# Supplementary material
Source: PubMed Central journal article supplement (PMC4866811)

# LC-MS/MS Identification of the O-Glycosylation and Hydroxylation of Amino Acid Residues of Collagen $\alpha$ -1 (II) chain from Bovine Cartilage

*Ehwang Song, and Yehia Mechref\**

Department of Chemistry and Biochemistry, Texas Tech University, Lubbock, TX

\*Corresponding author

Email: [yehia.mechref@ttu.edu](mailto:yehia.mechref@ttu.edu)

Tel: 806-742-3059

Fax: 806-742-1289

**Keywords:** type II collagen, CO2A1, hydroxylation, glycosylation, glycopeptides, LC-MS/MS, quantitation

K287

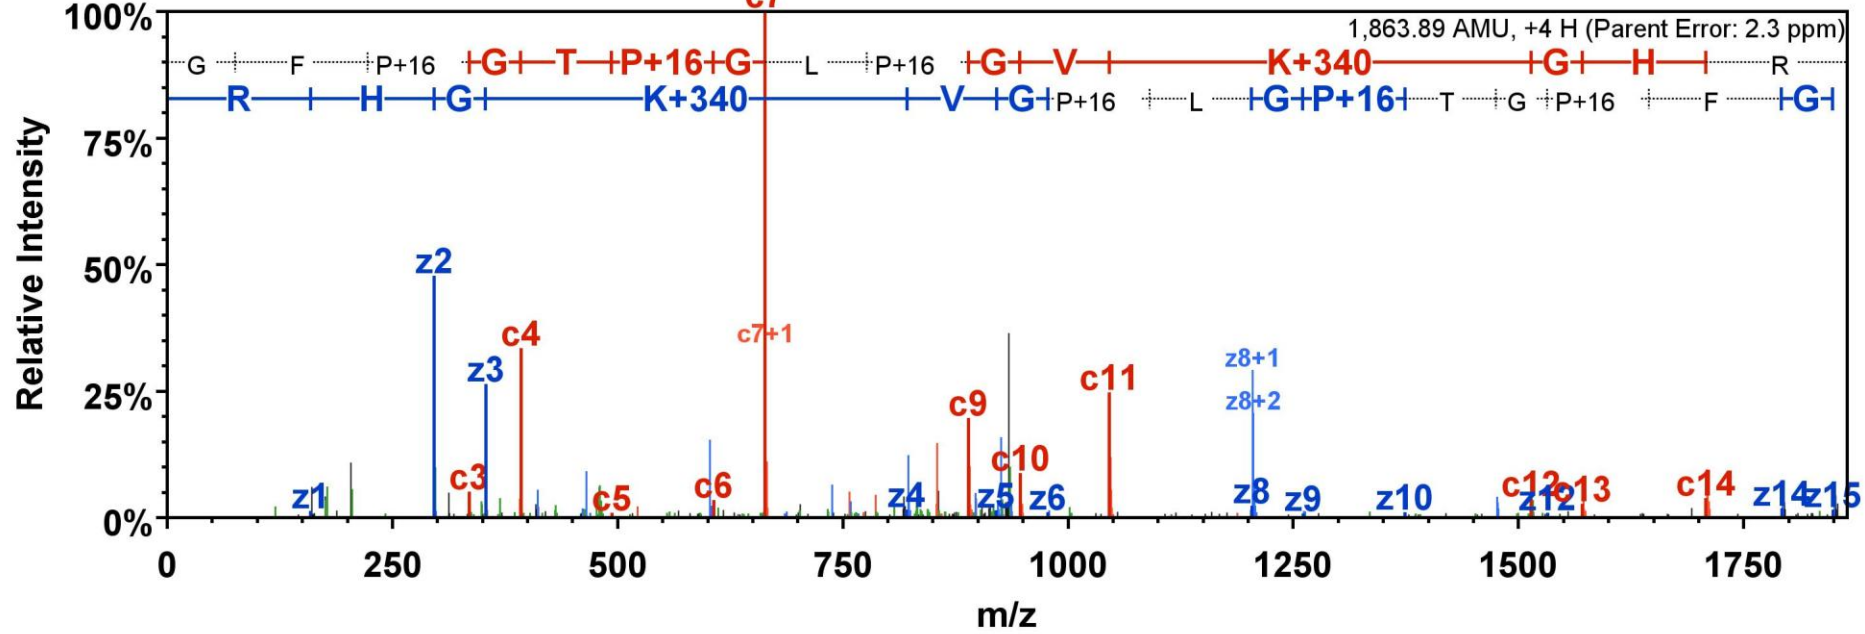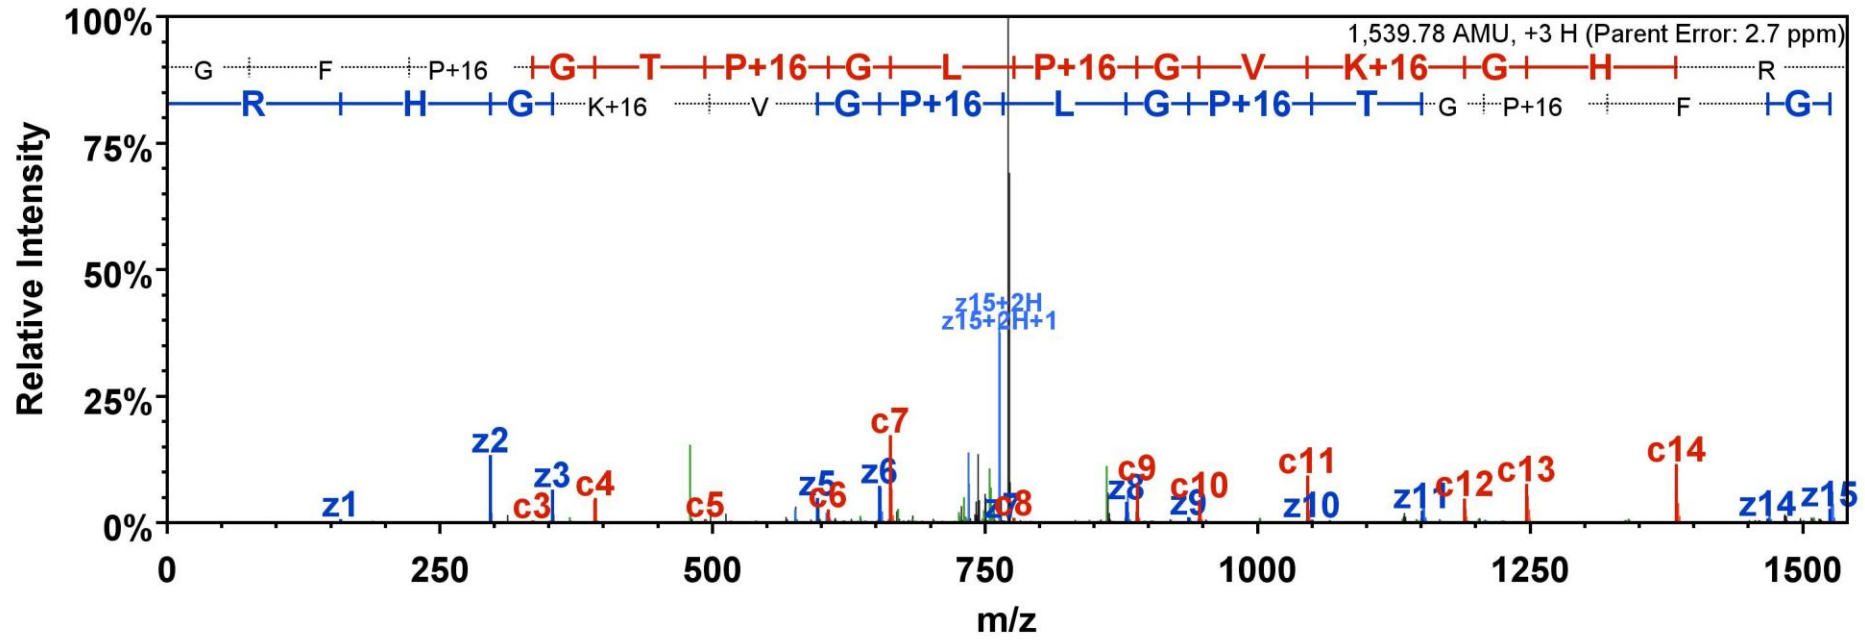

K299

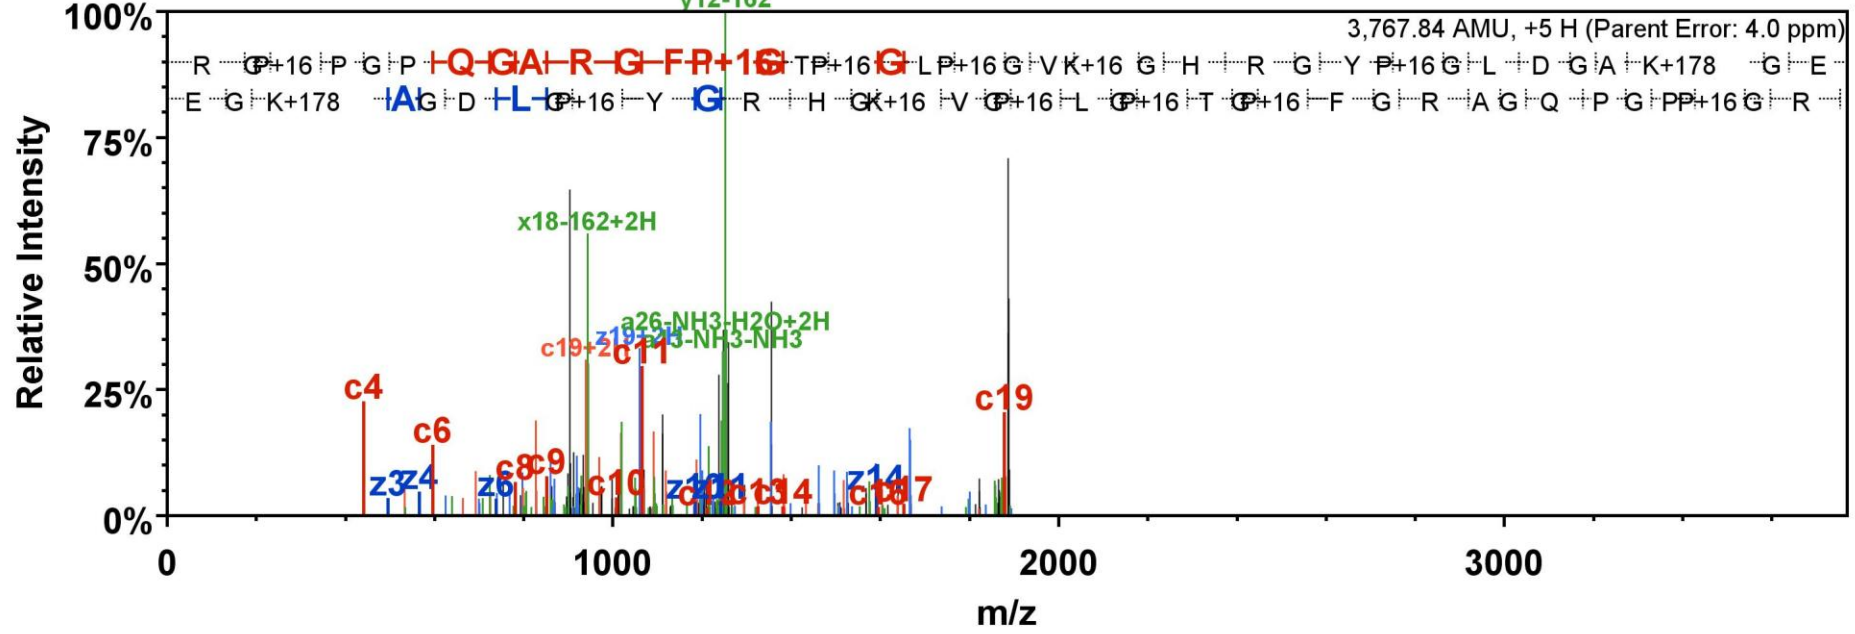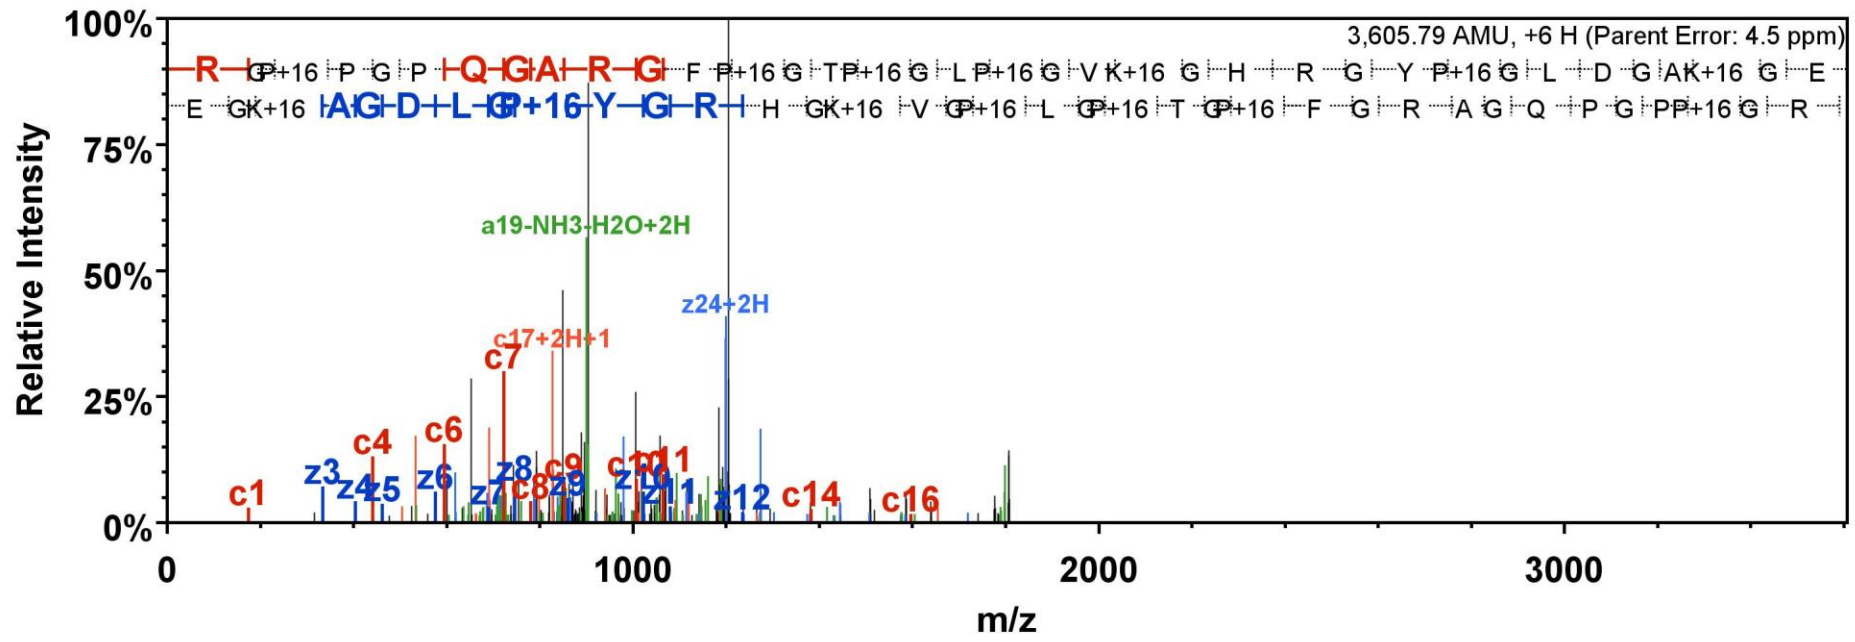

K299

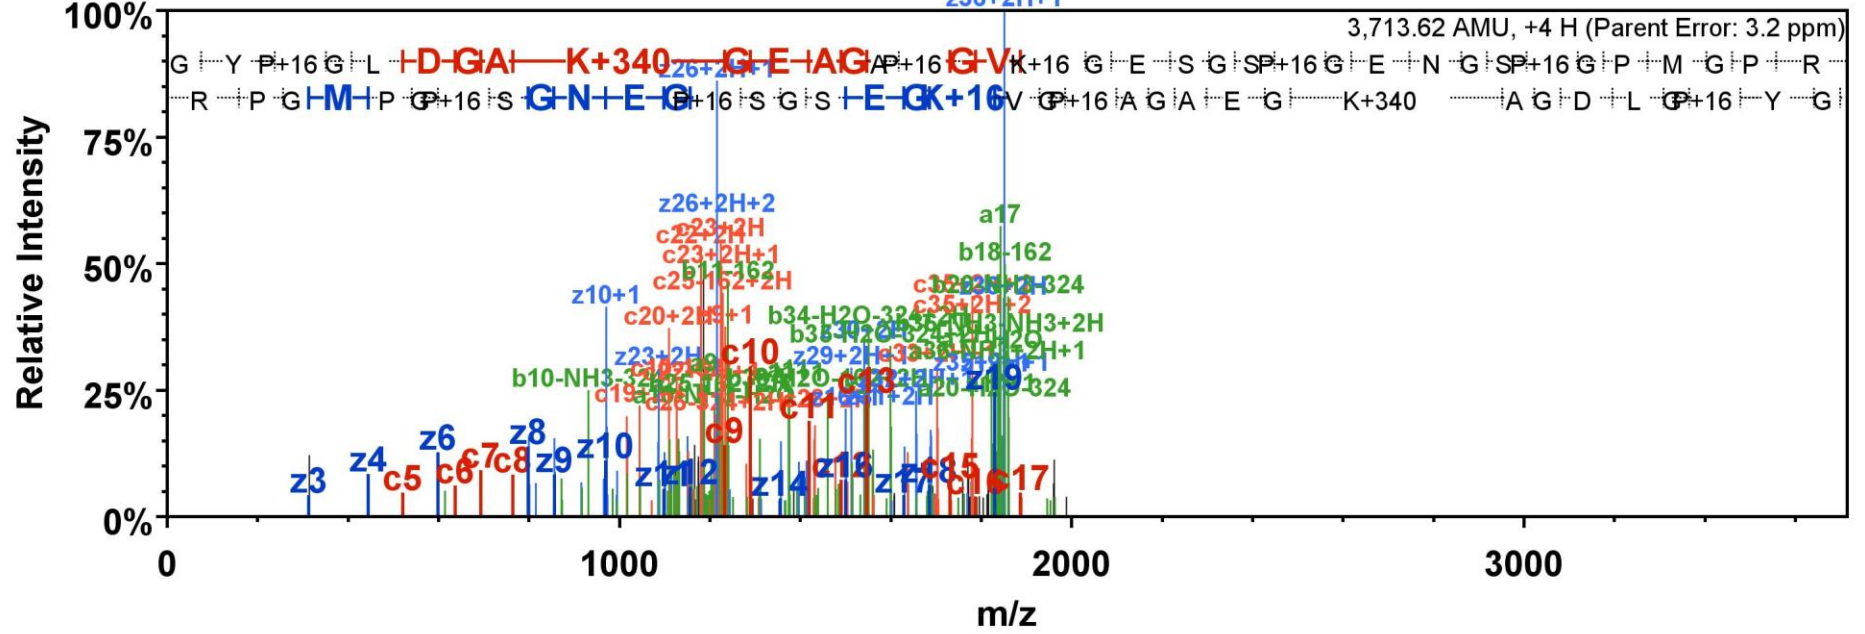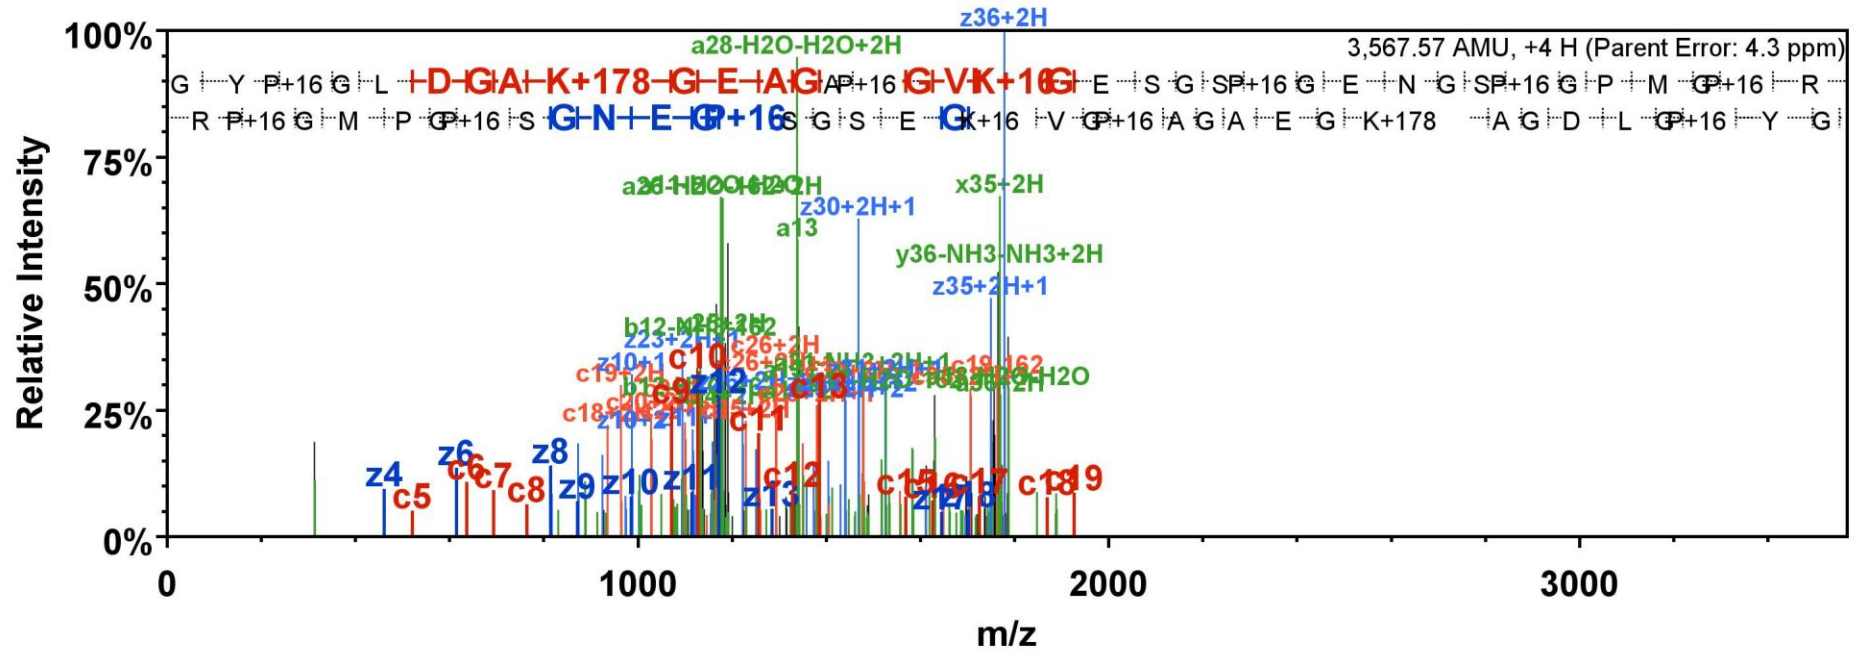

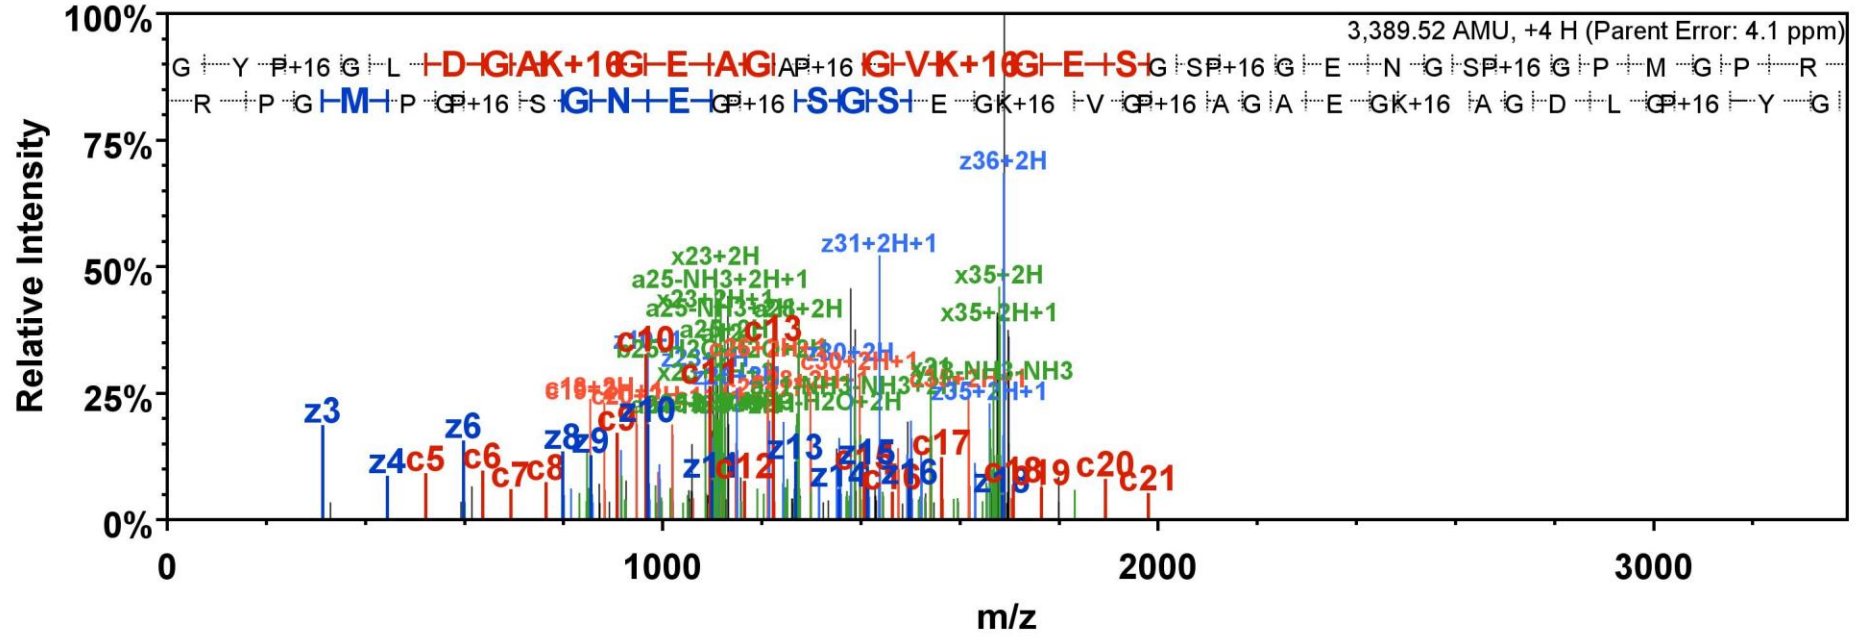

K308

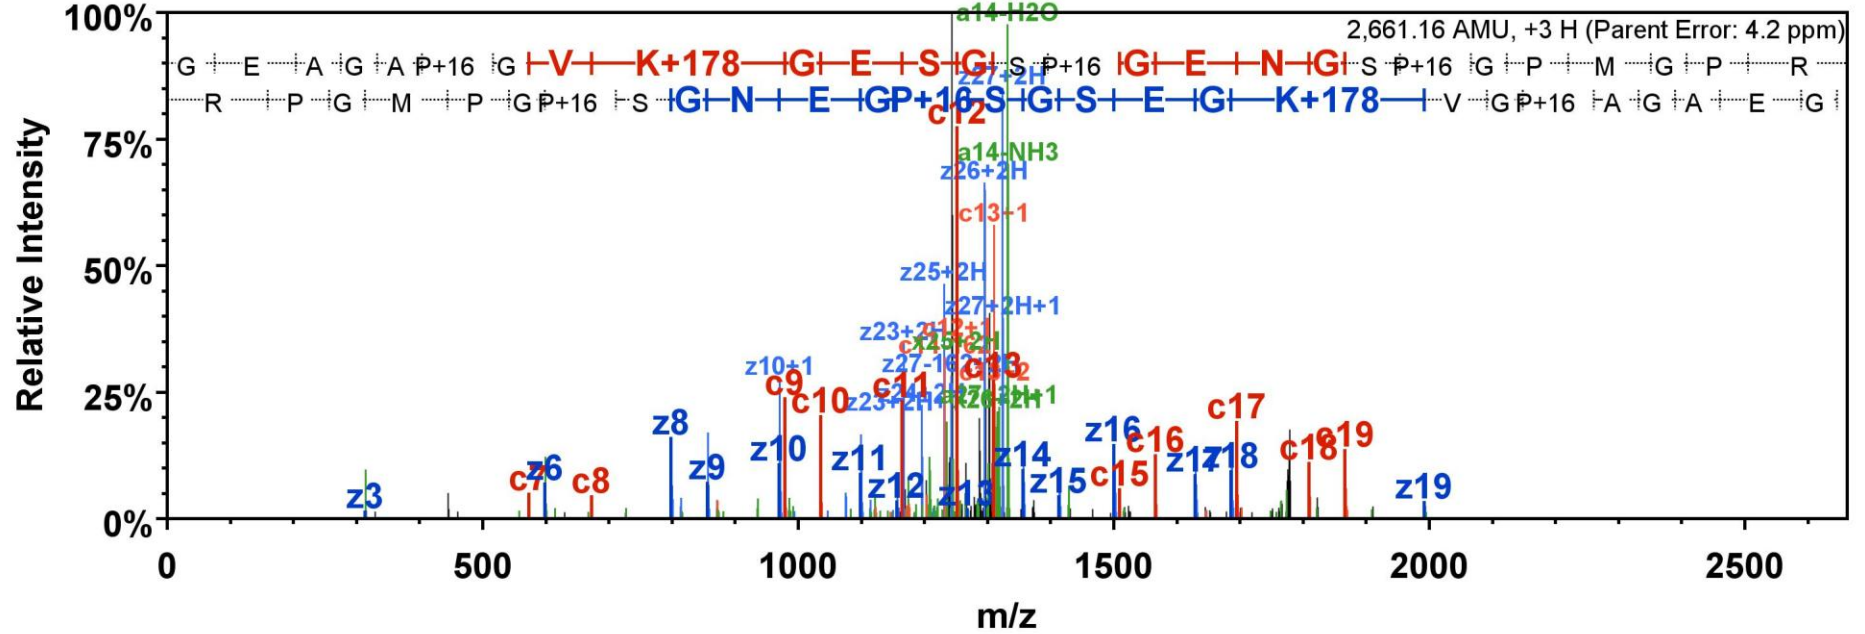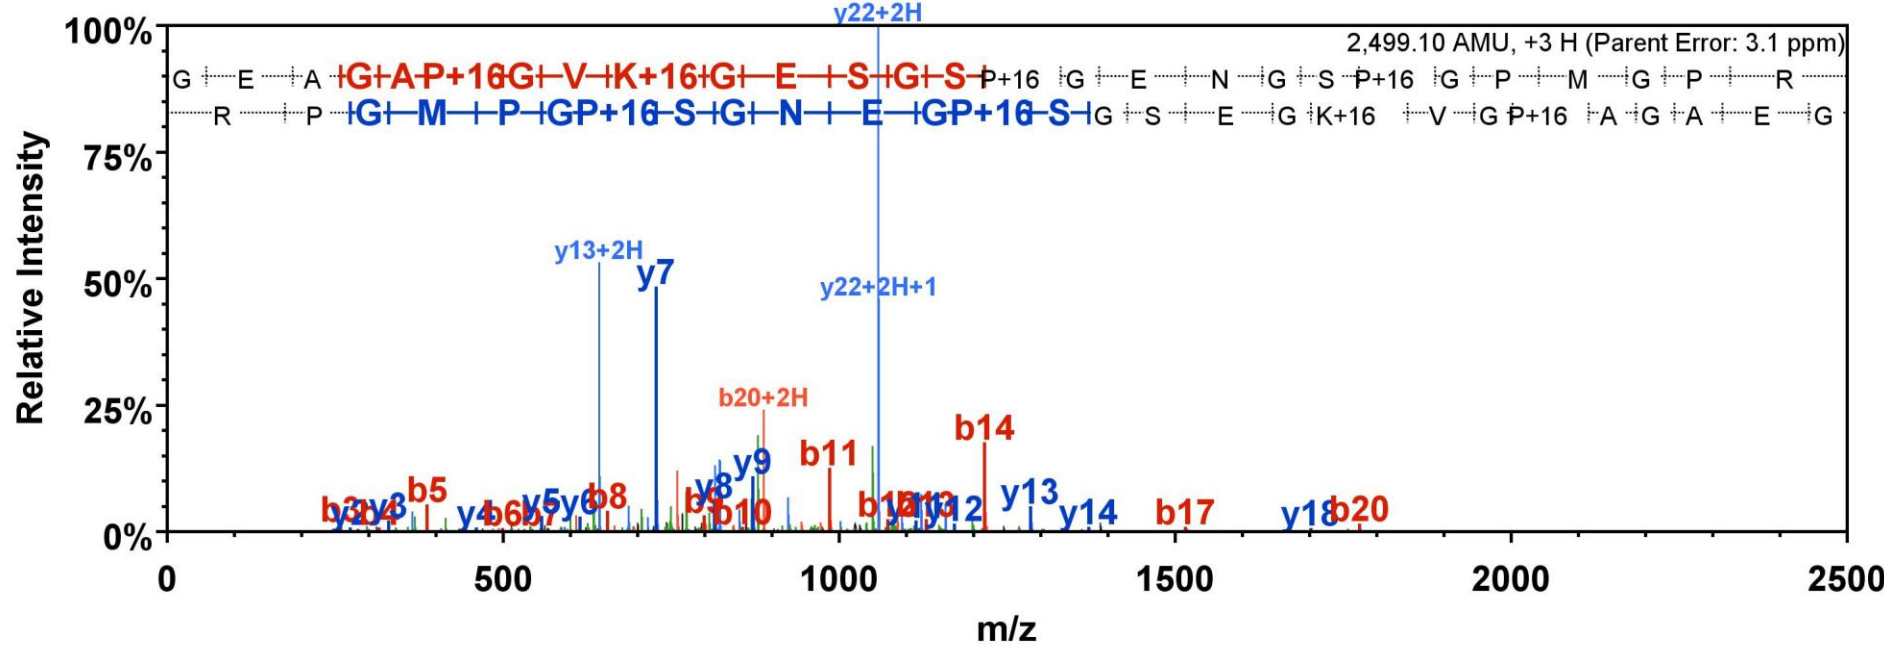



K374

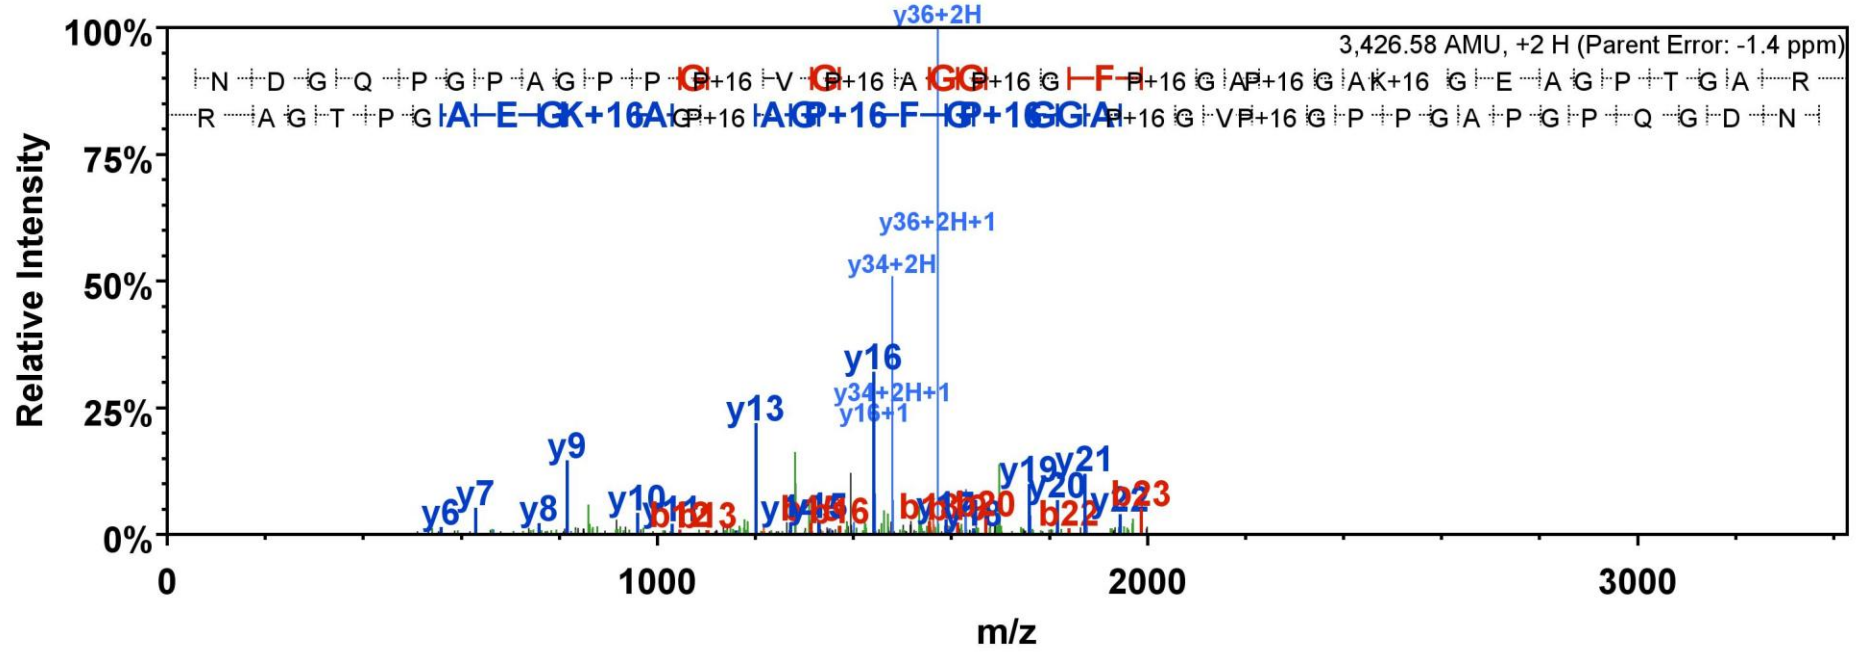



K374

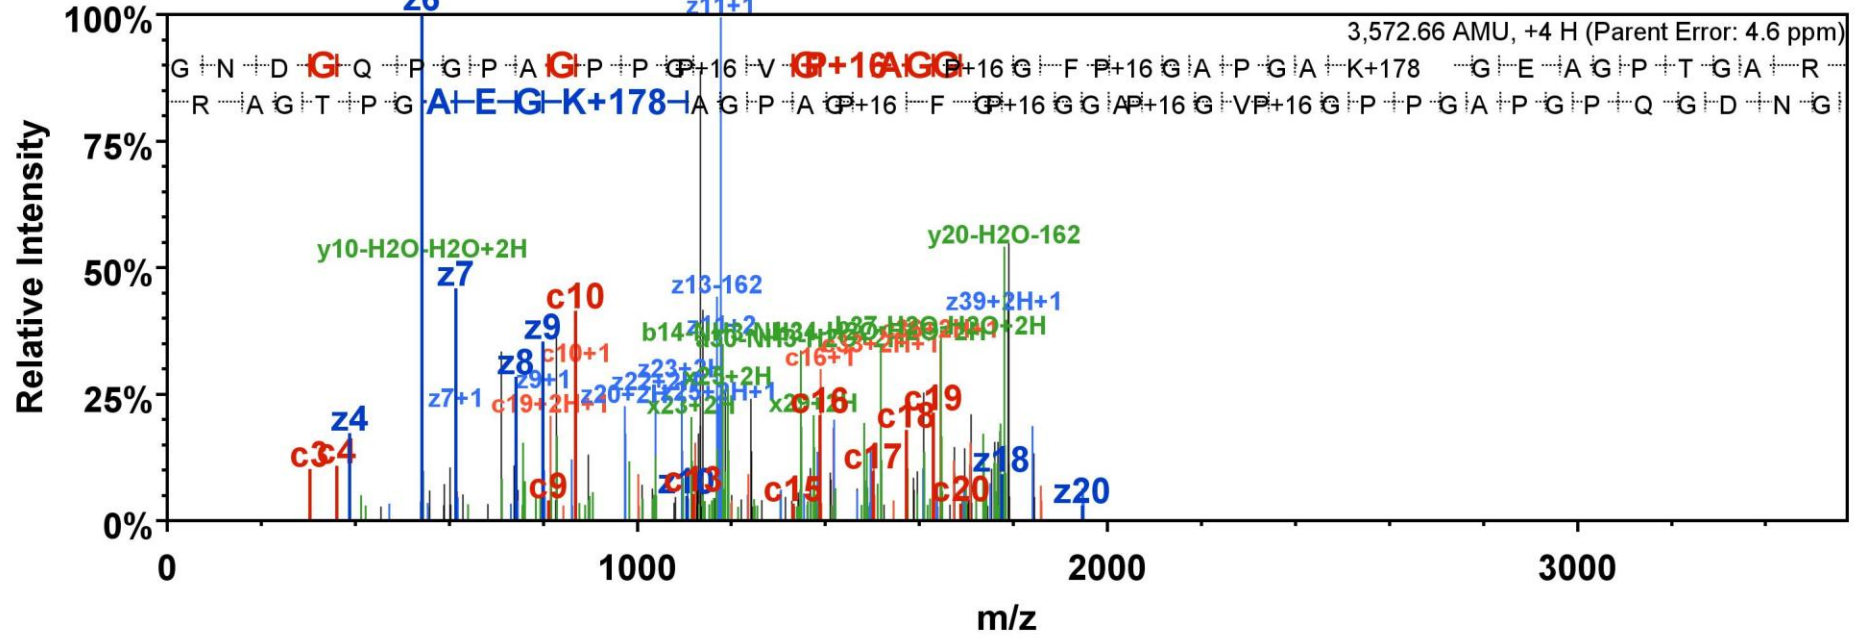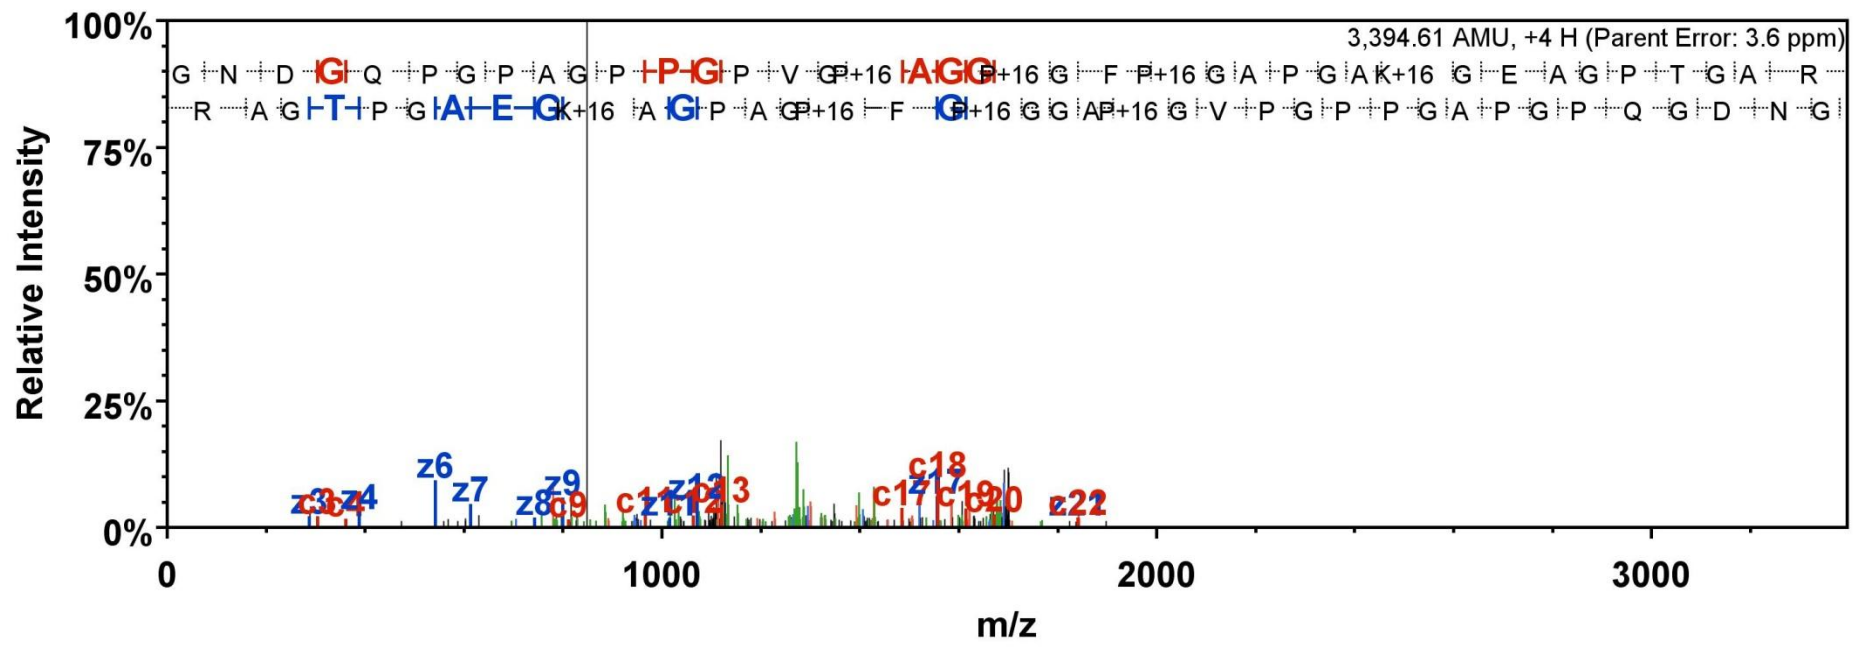

K374

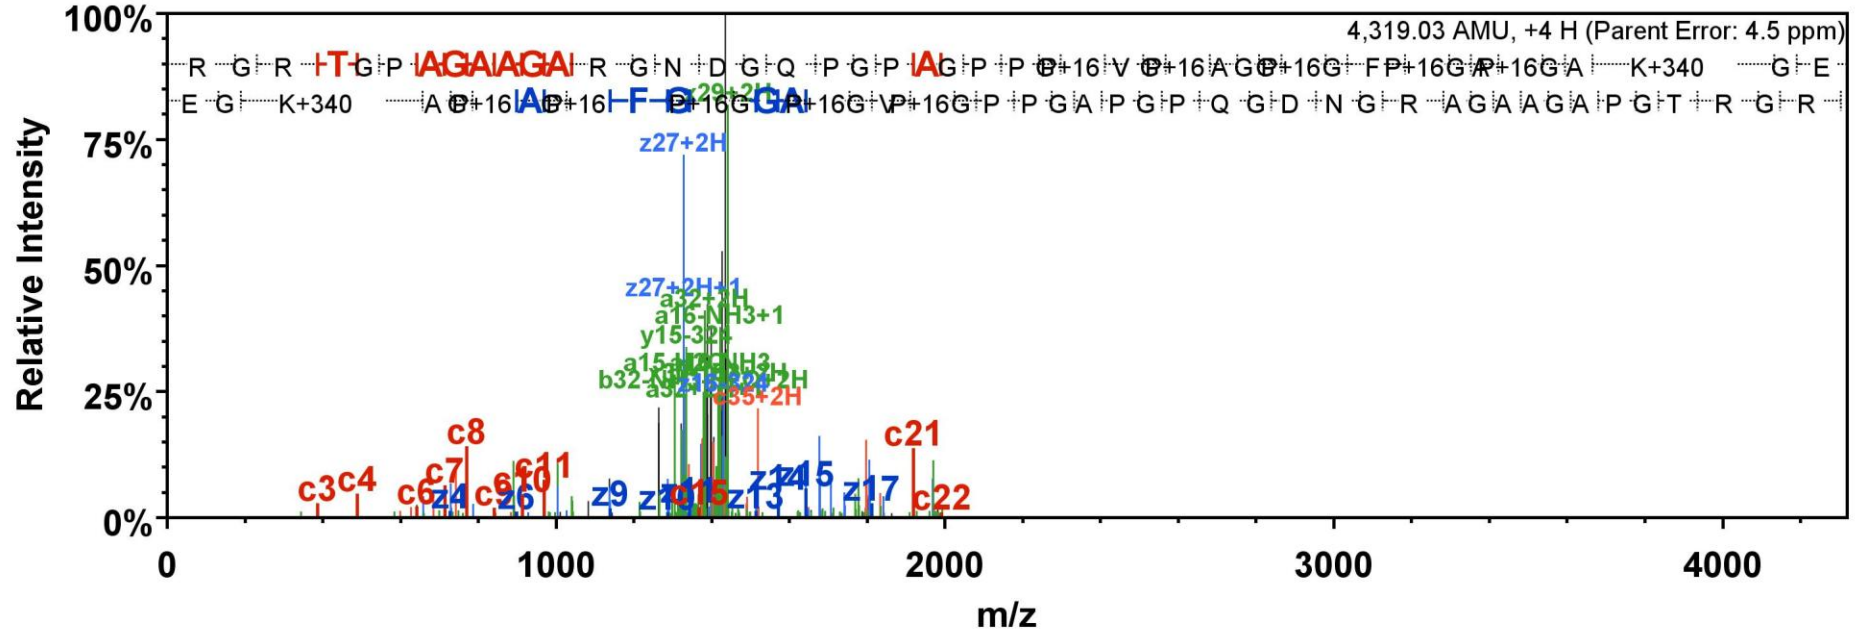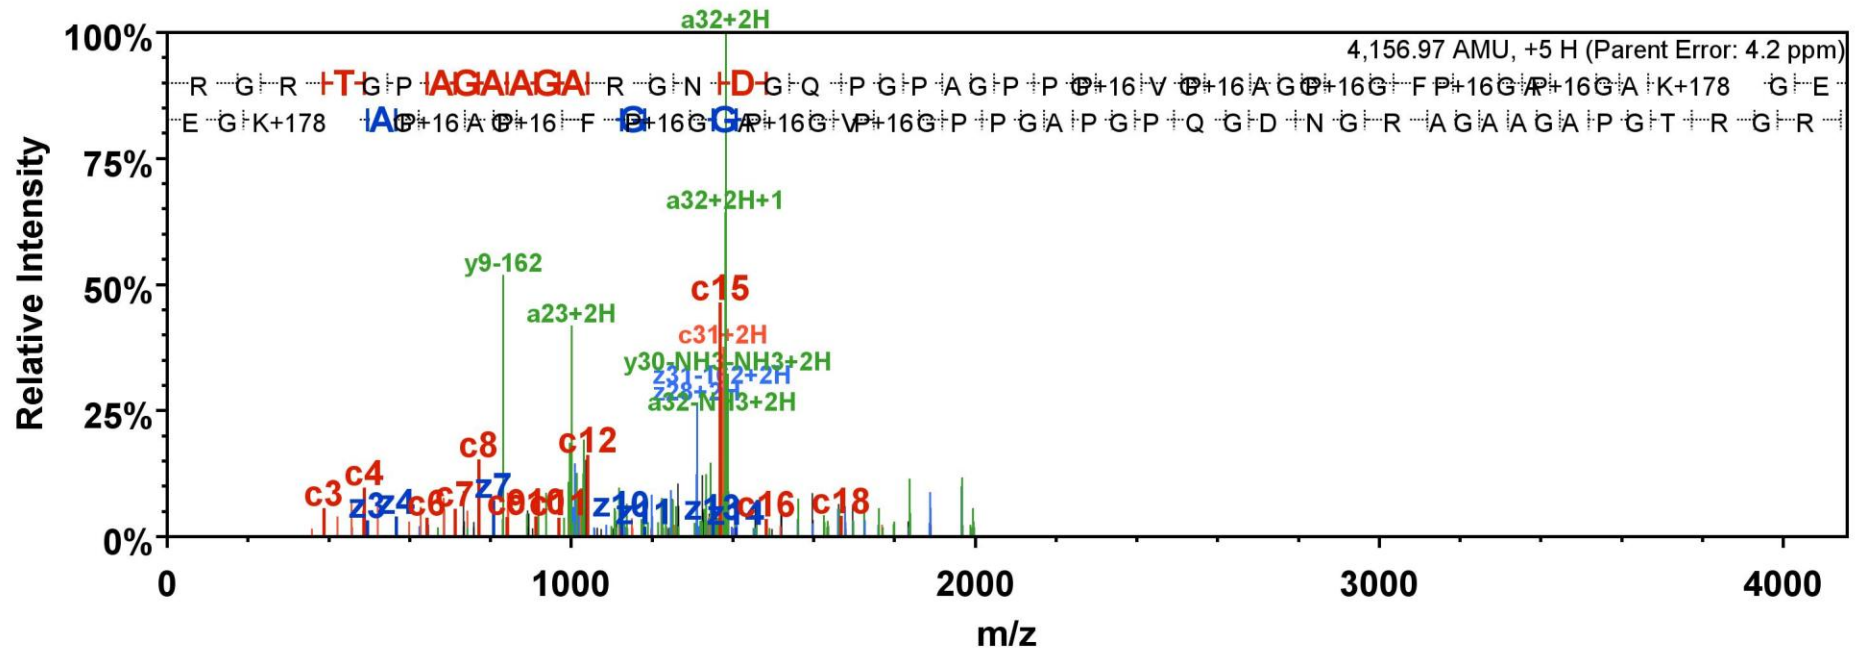

K374

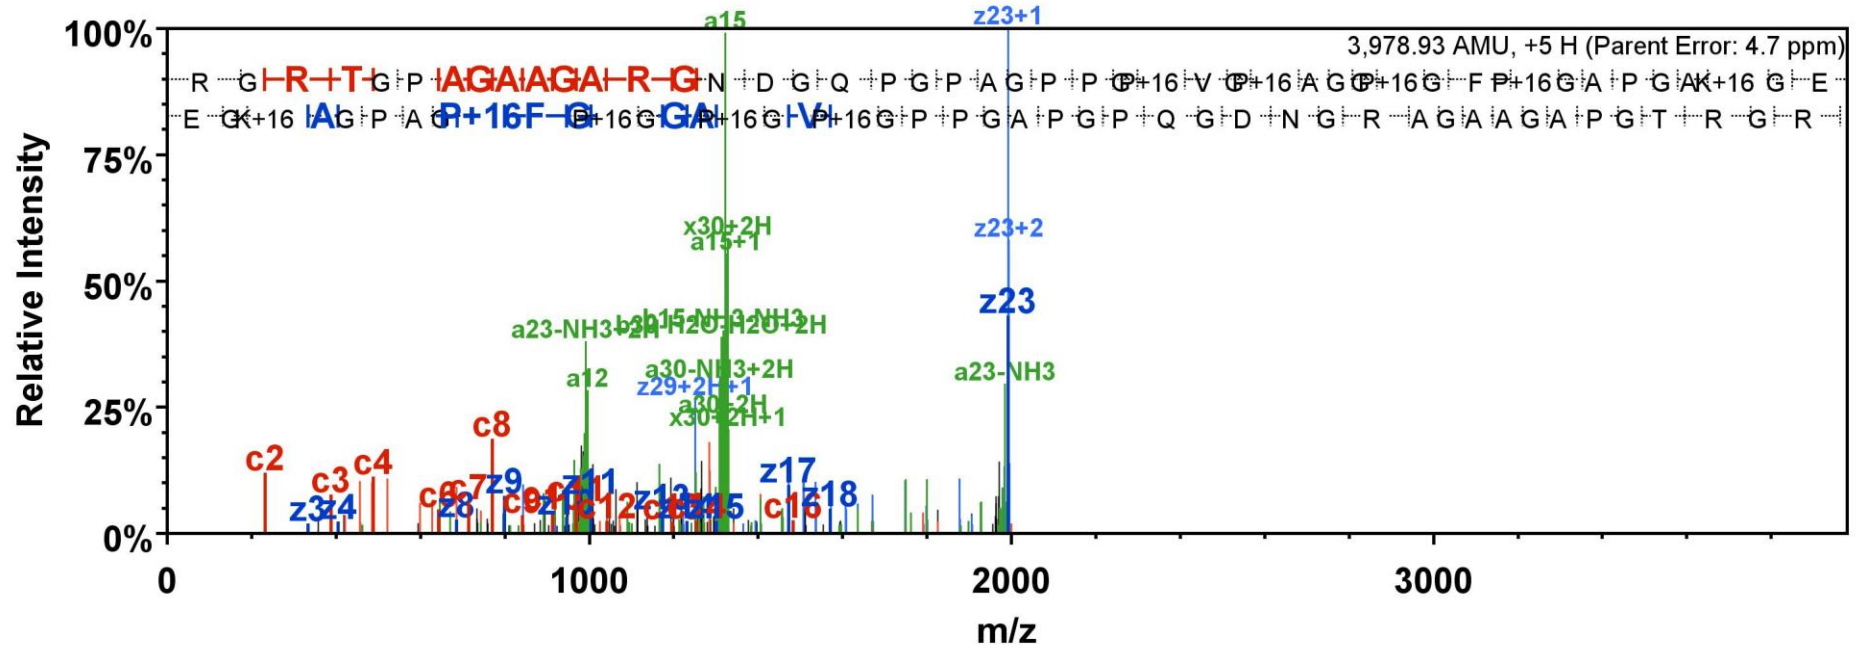



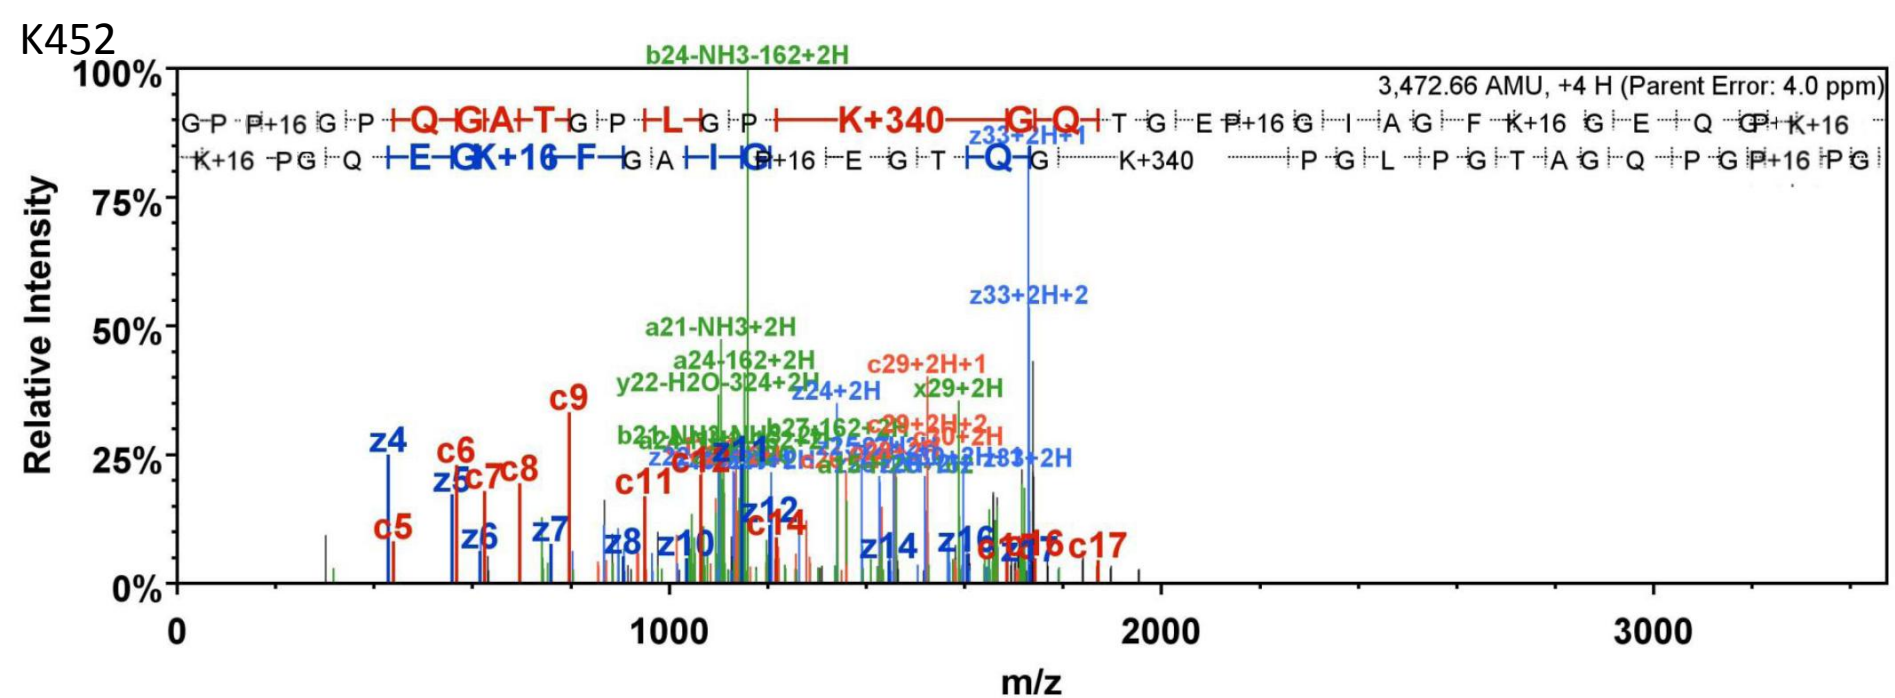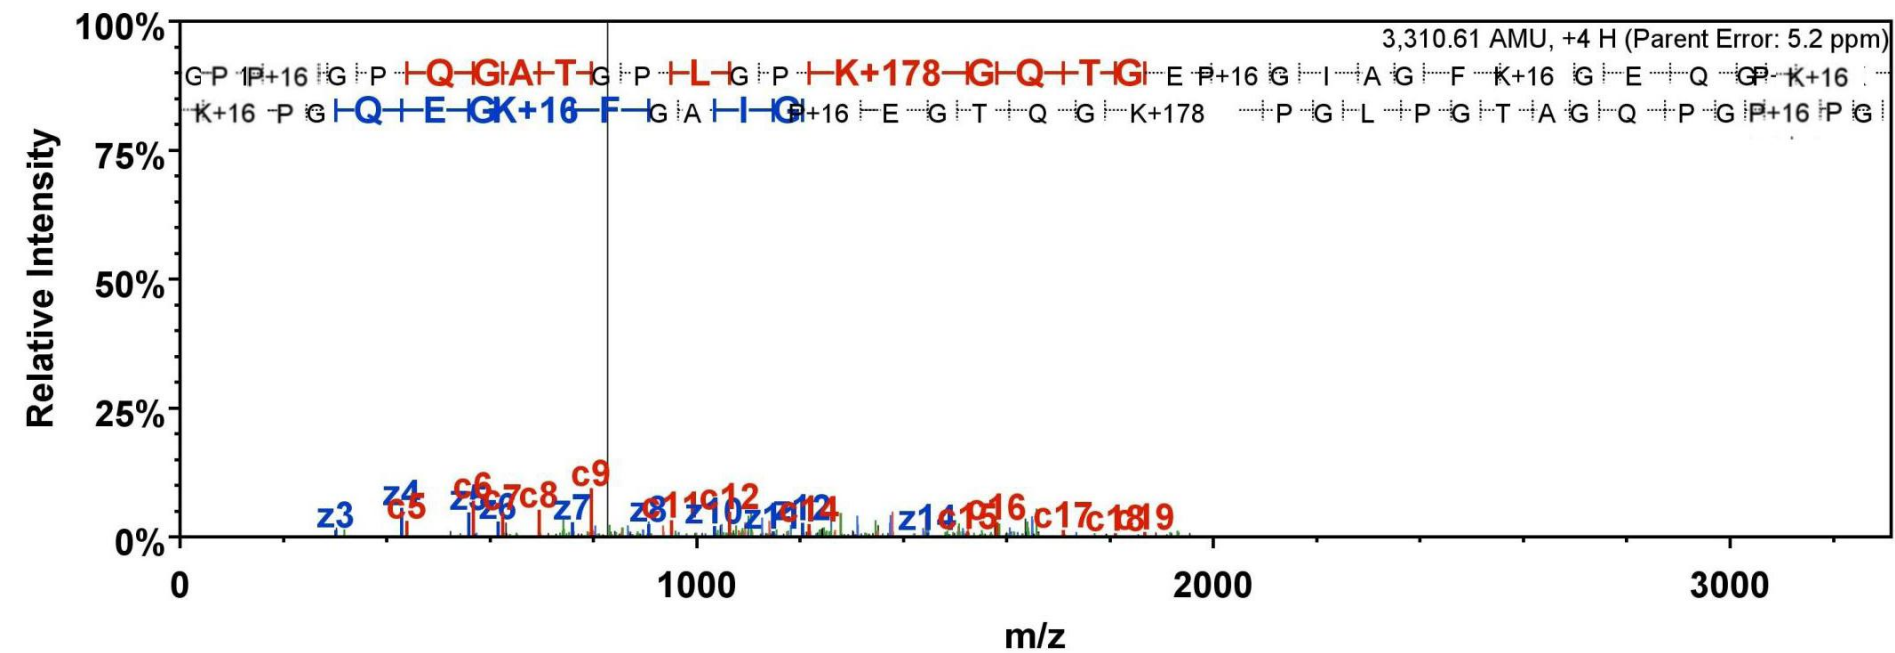



K527

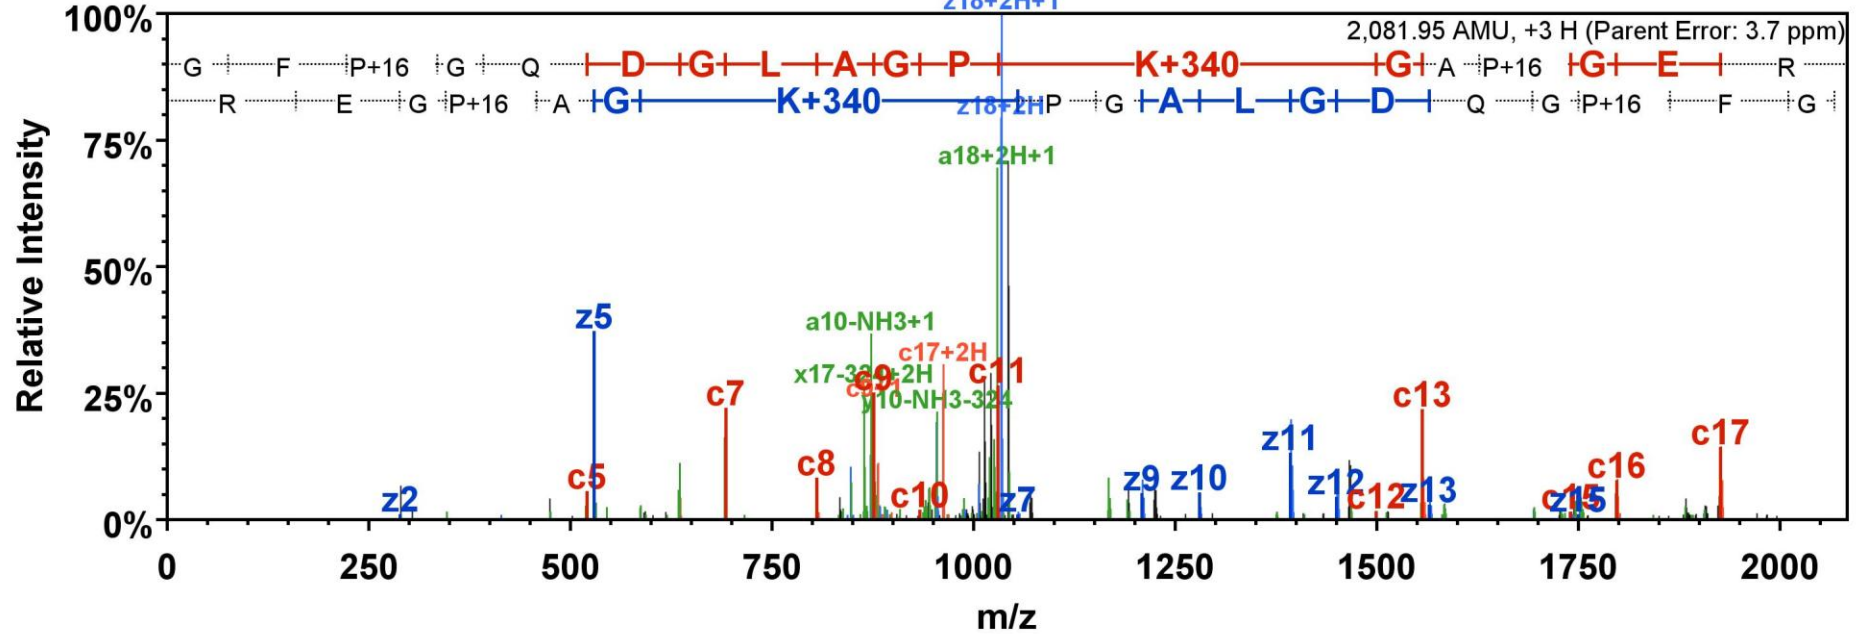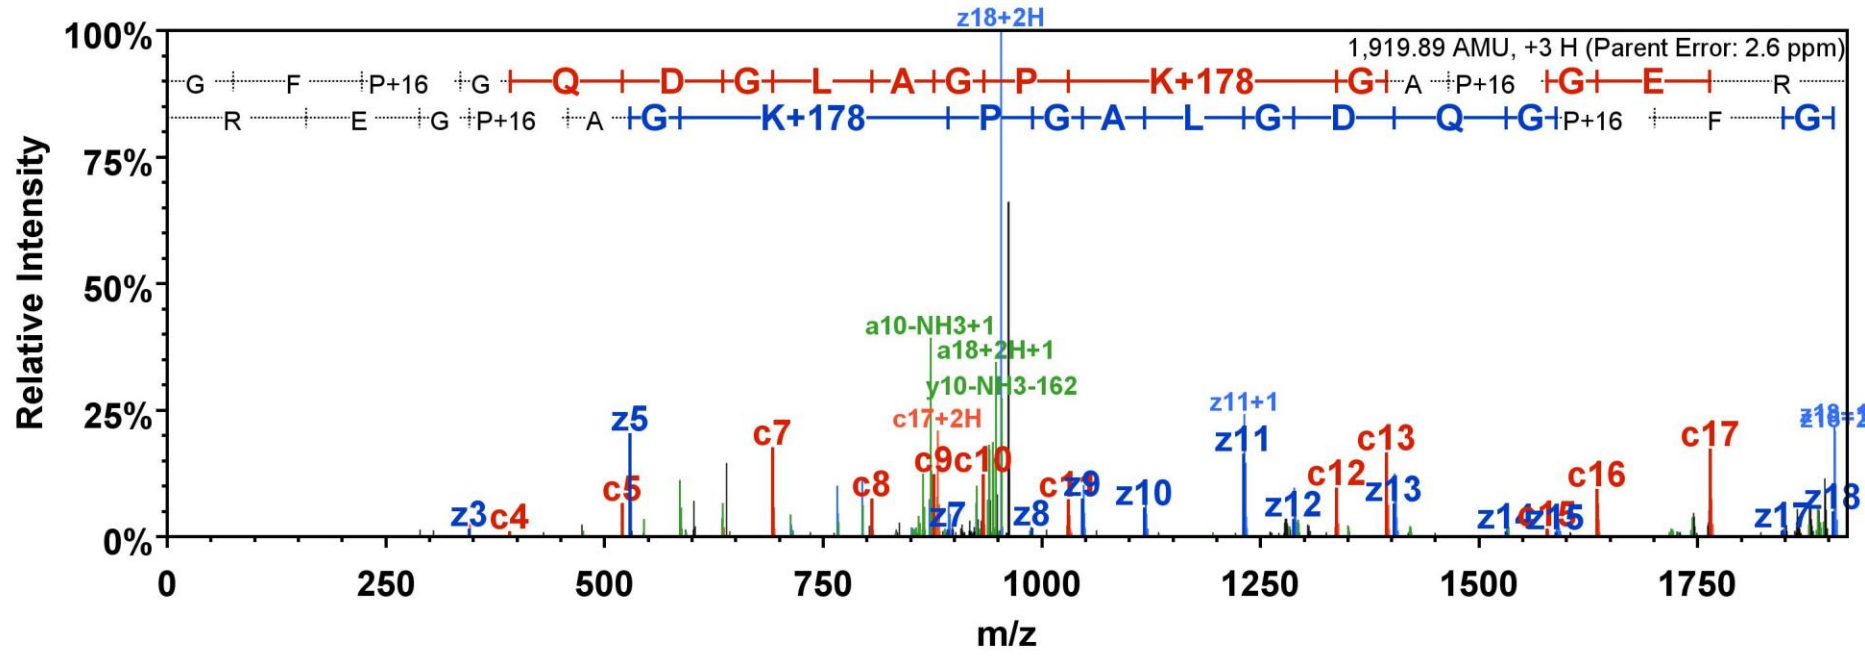

K527

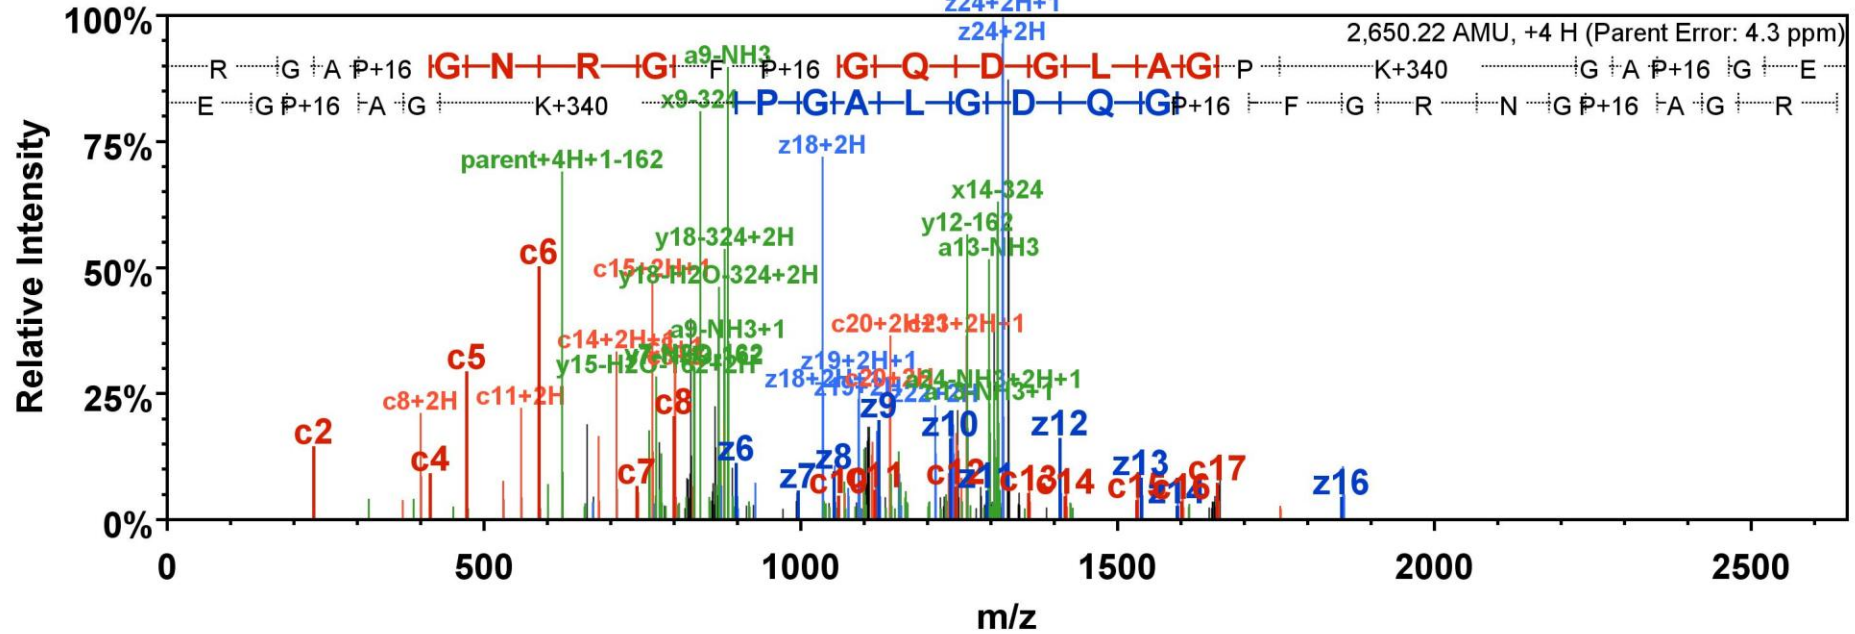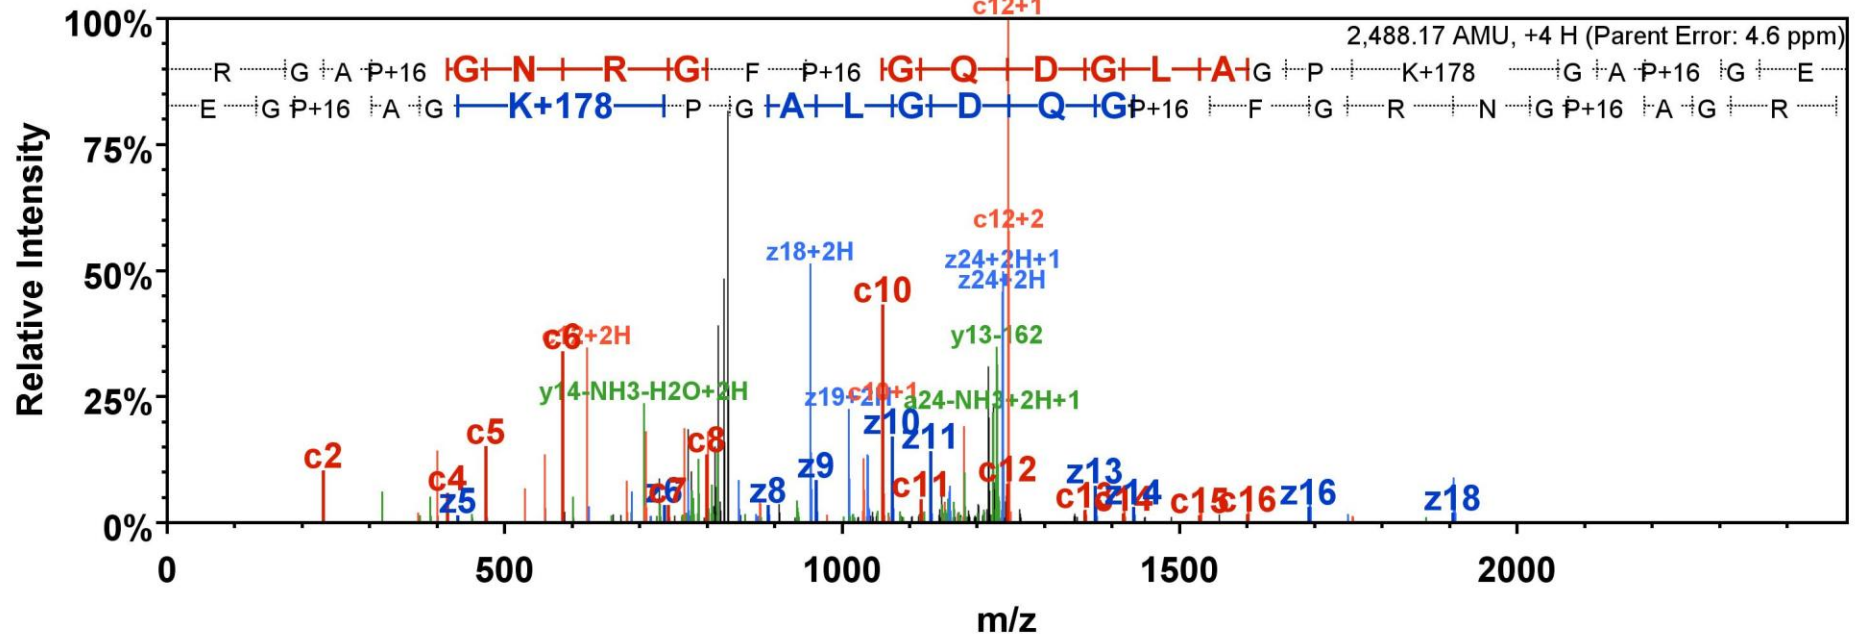



K542

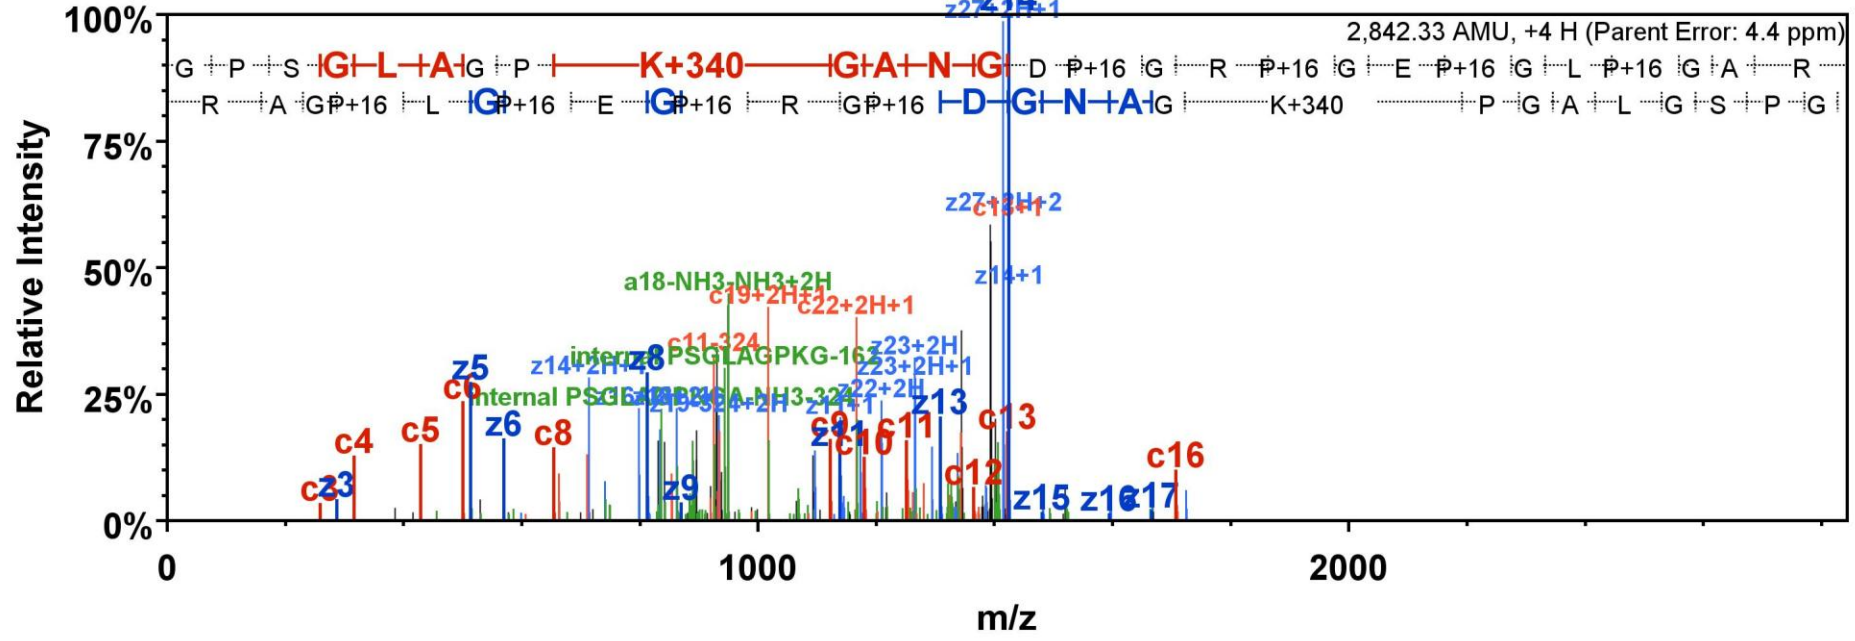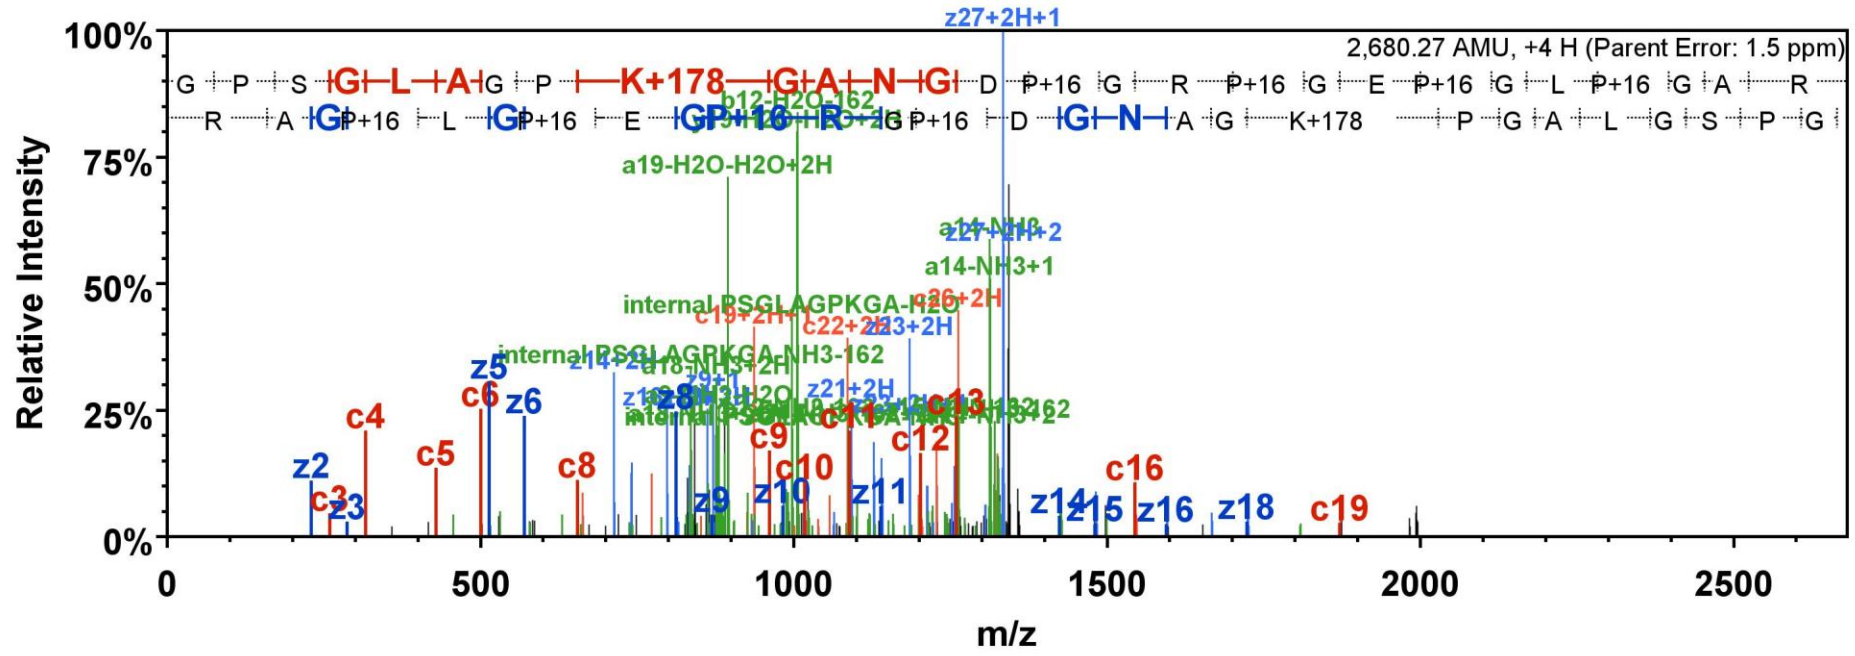

K542

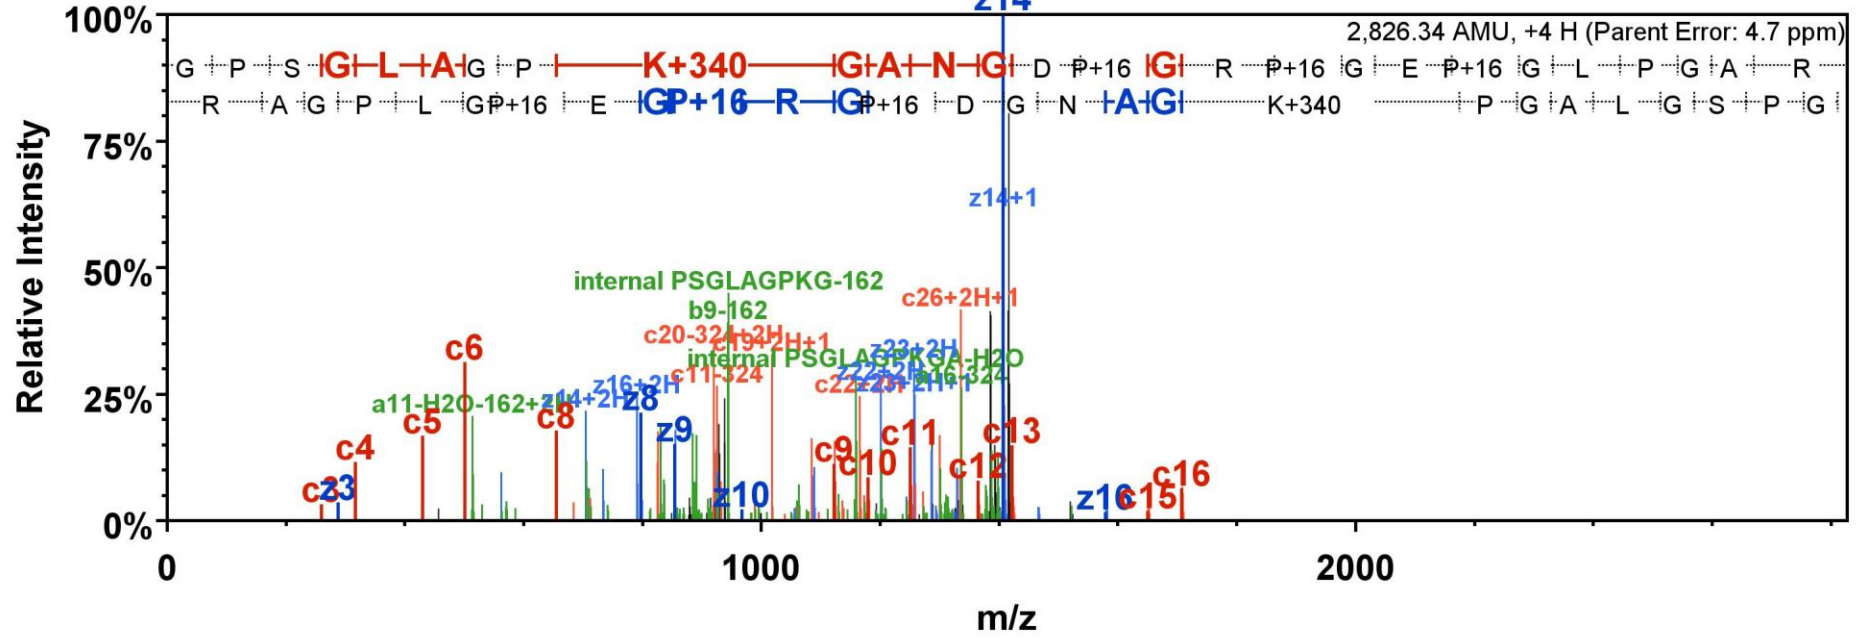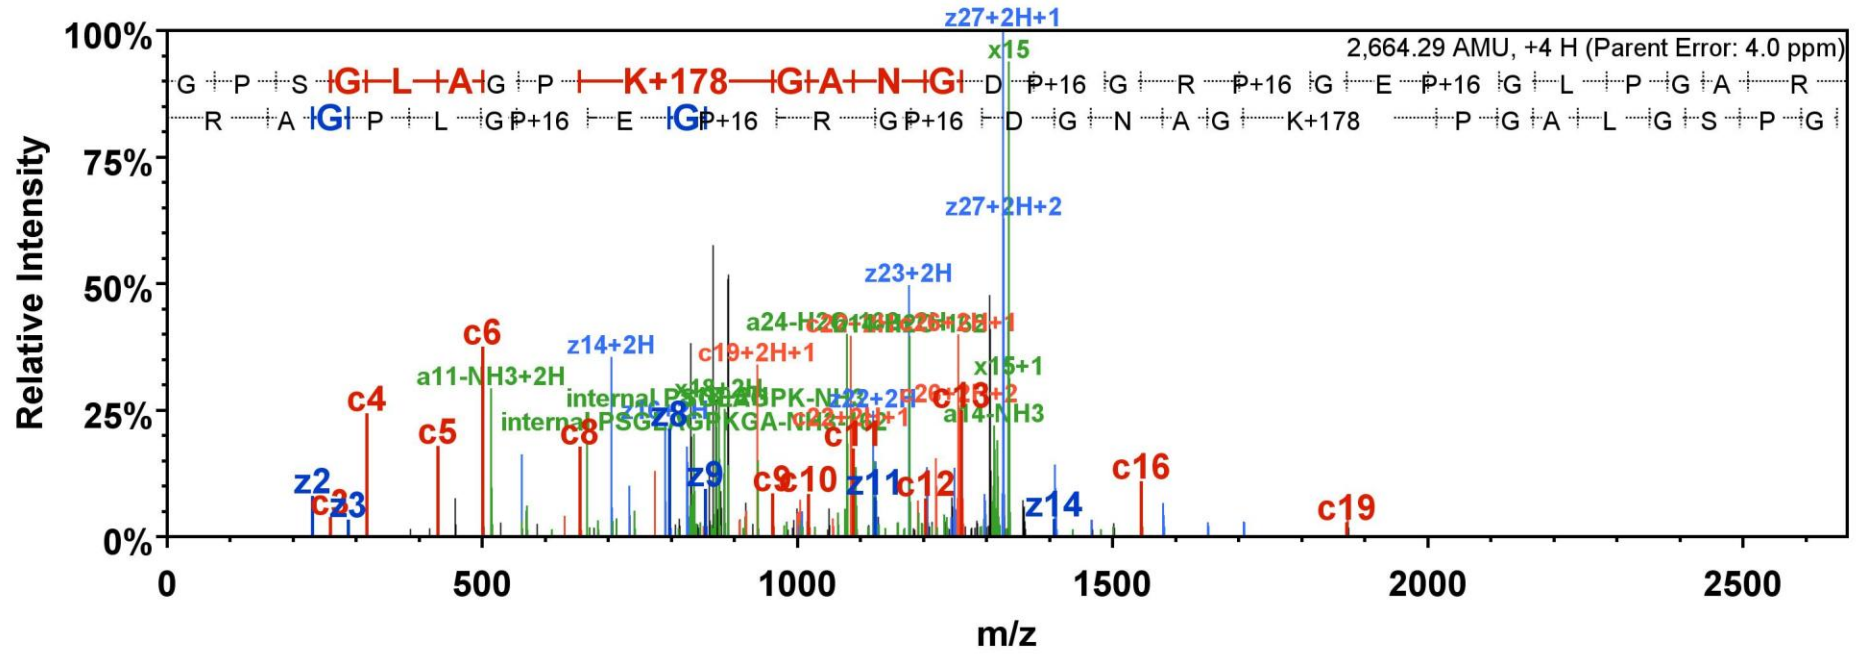

K731

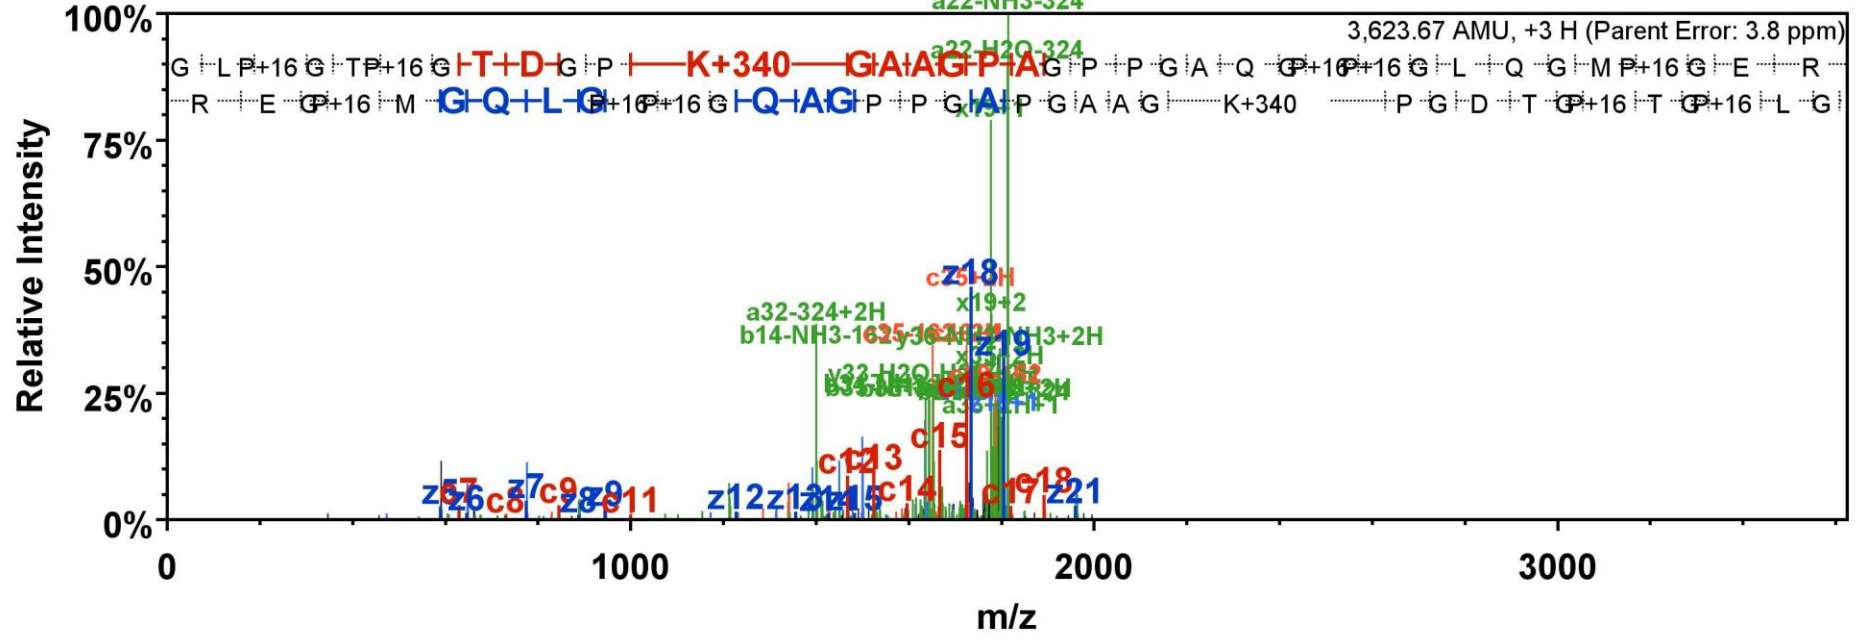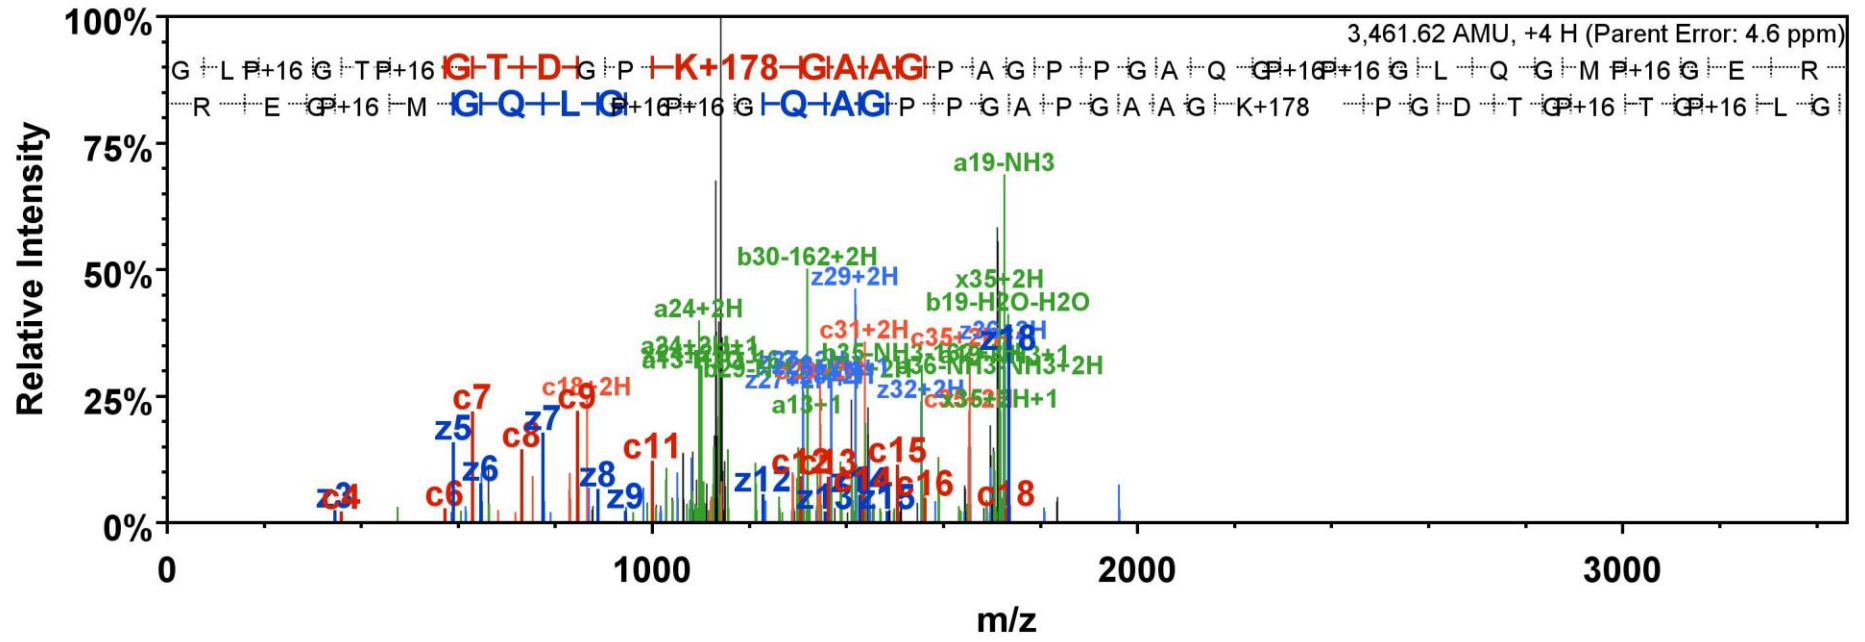

K764

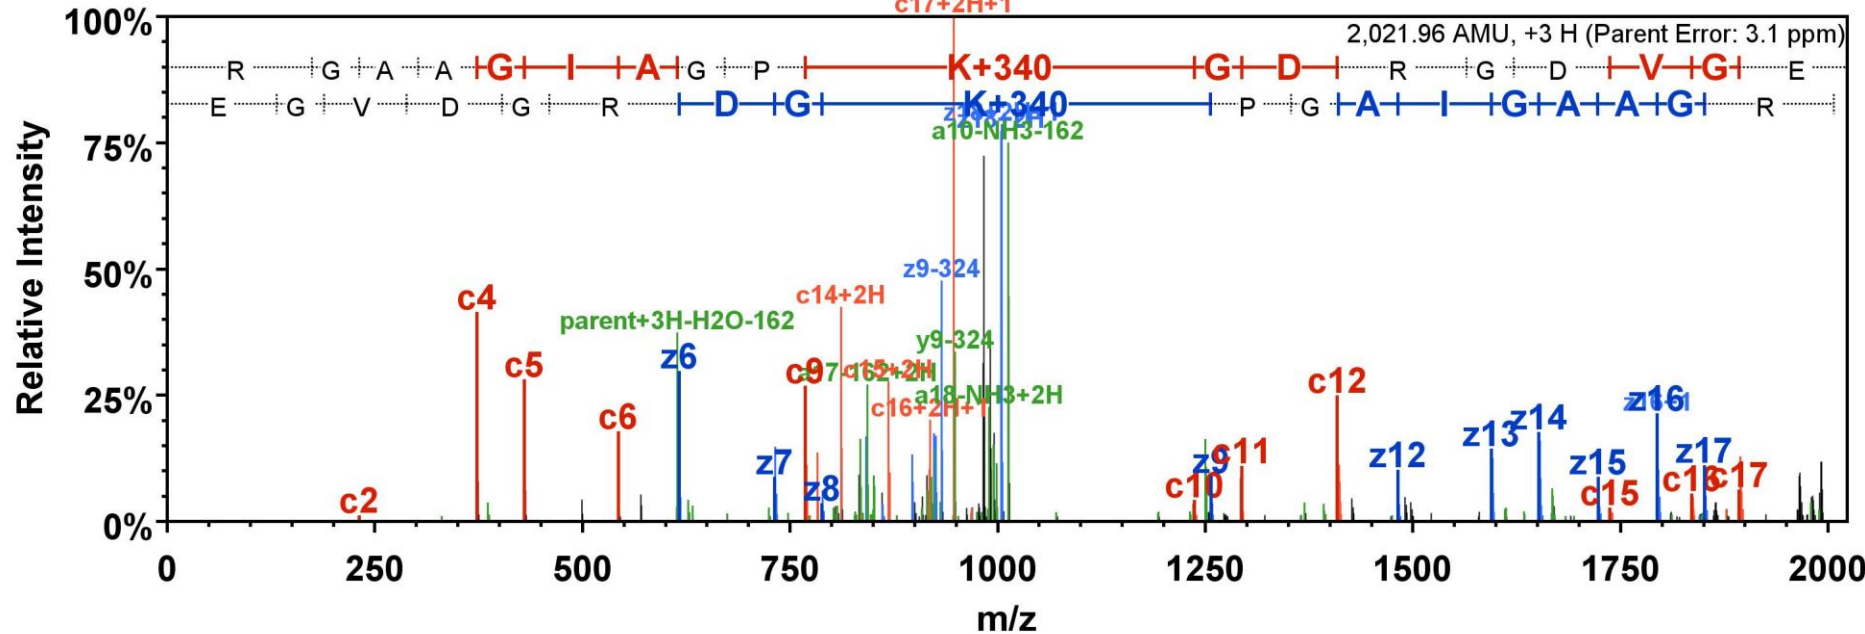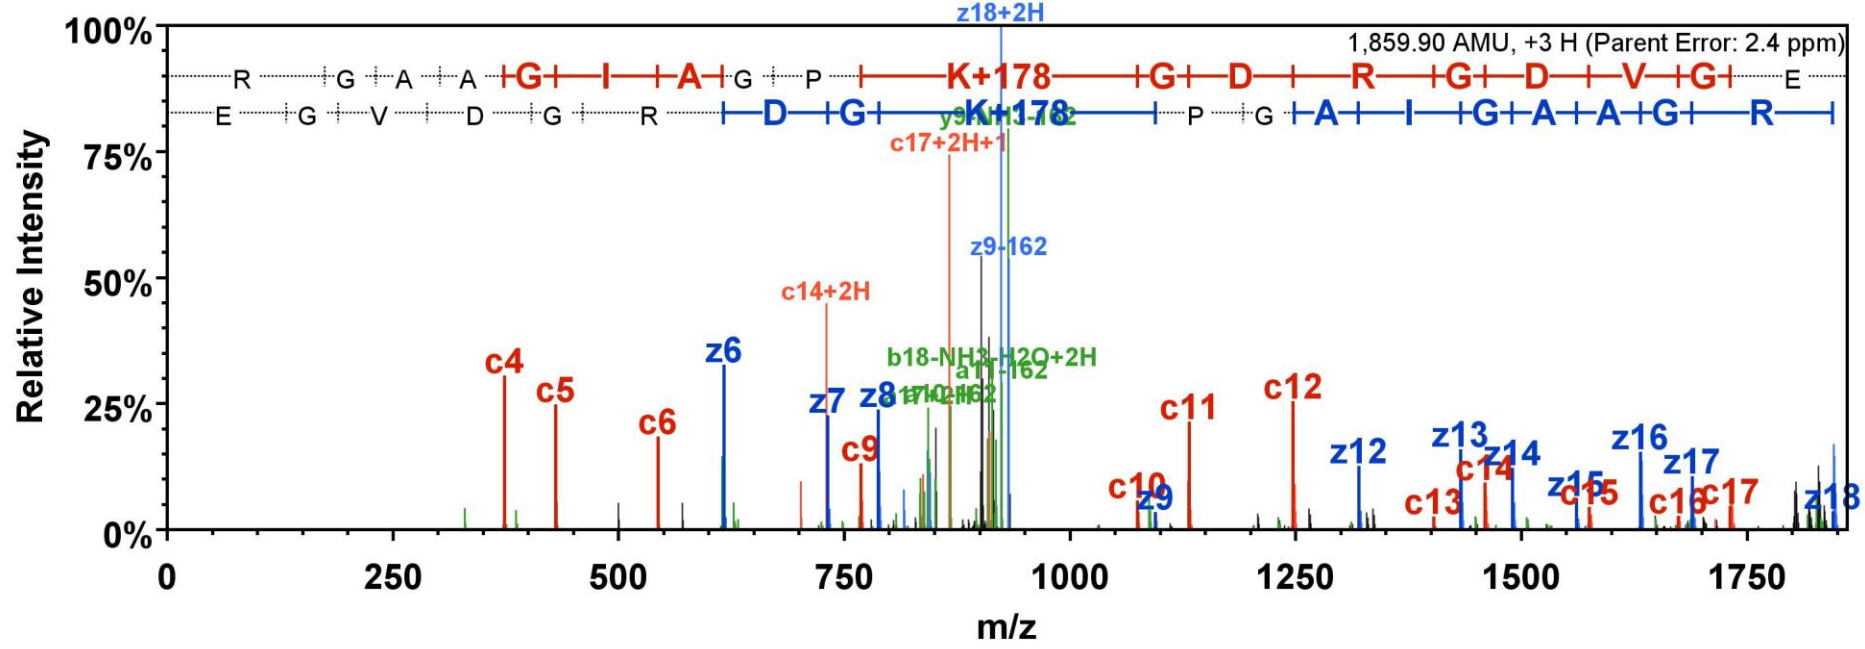

K764

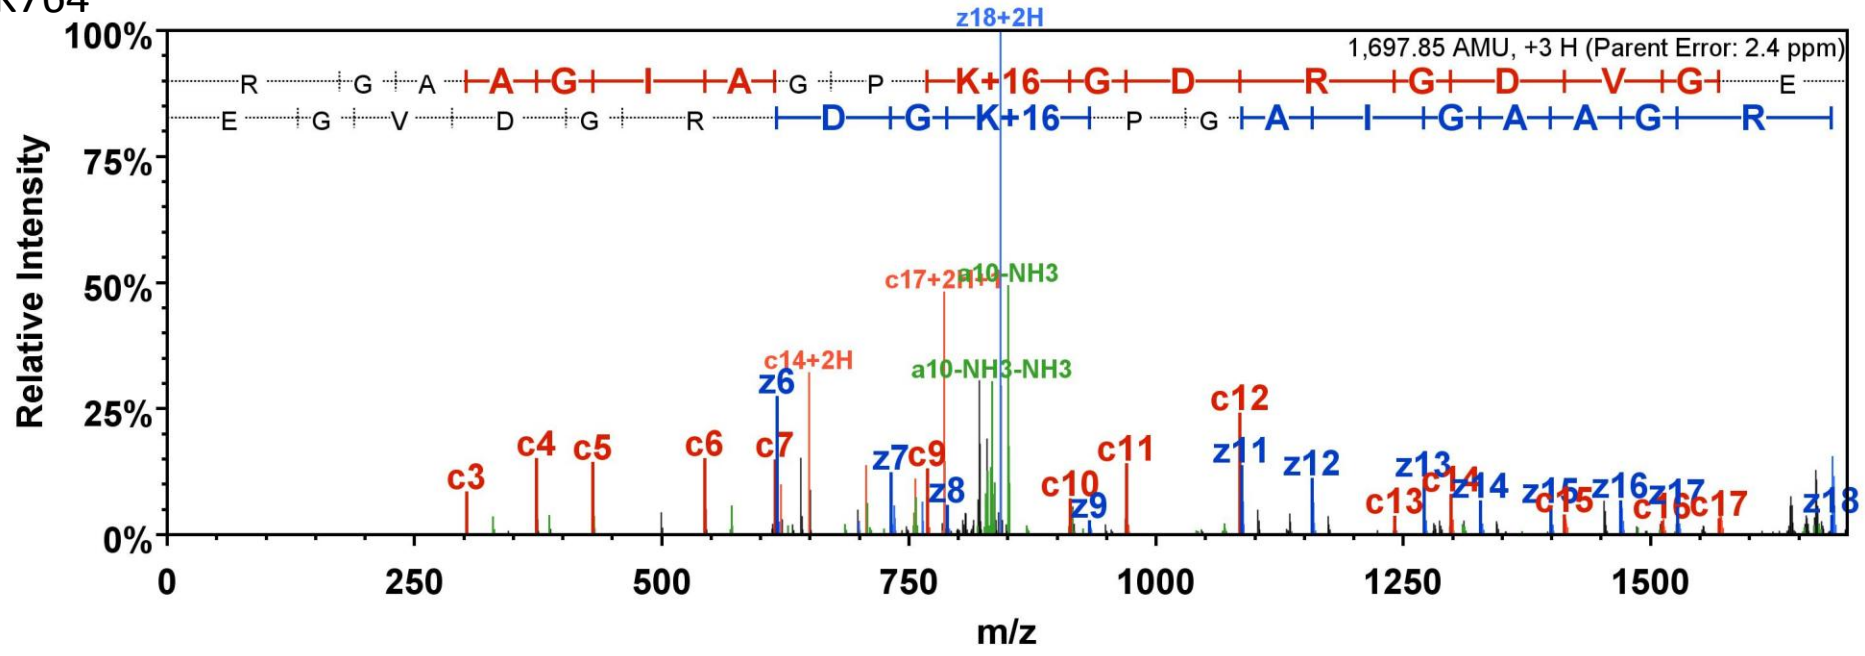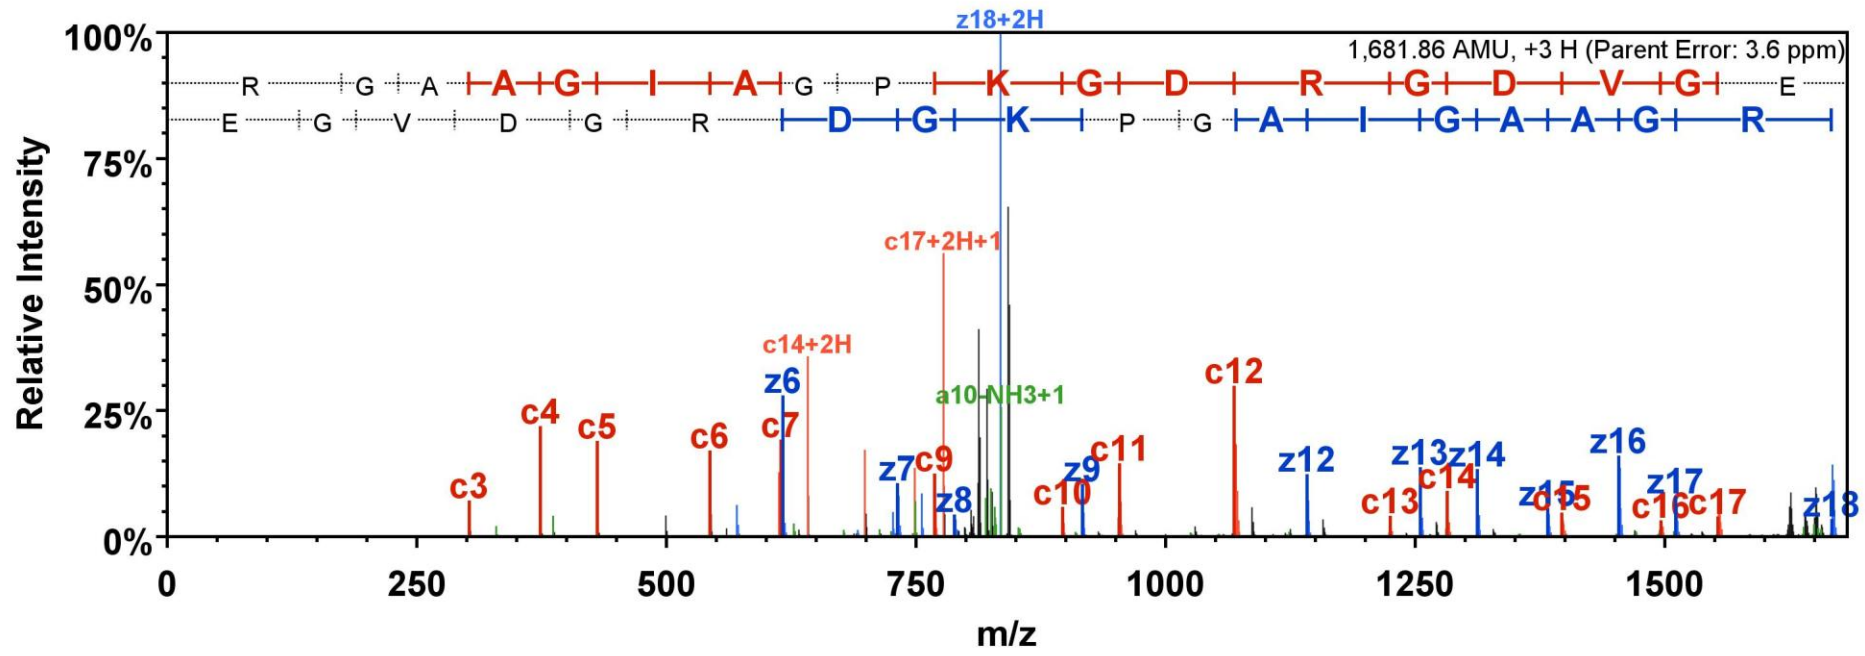

K848

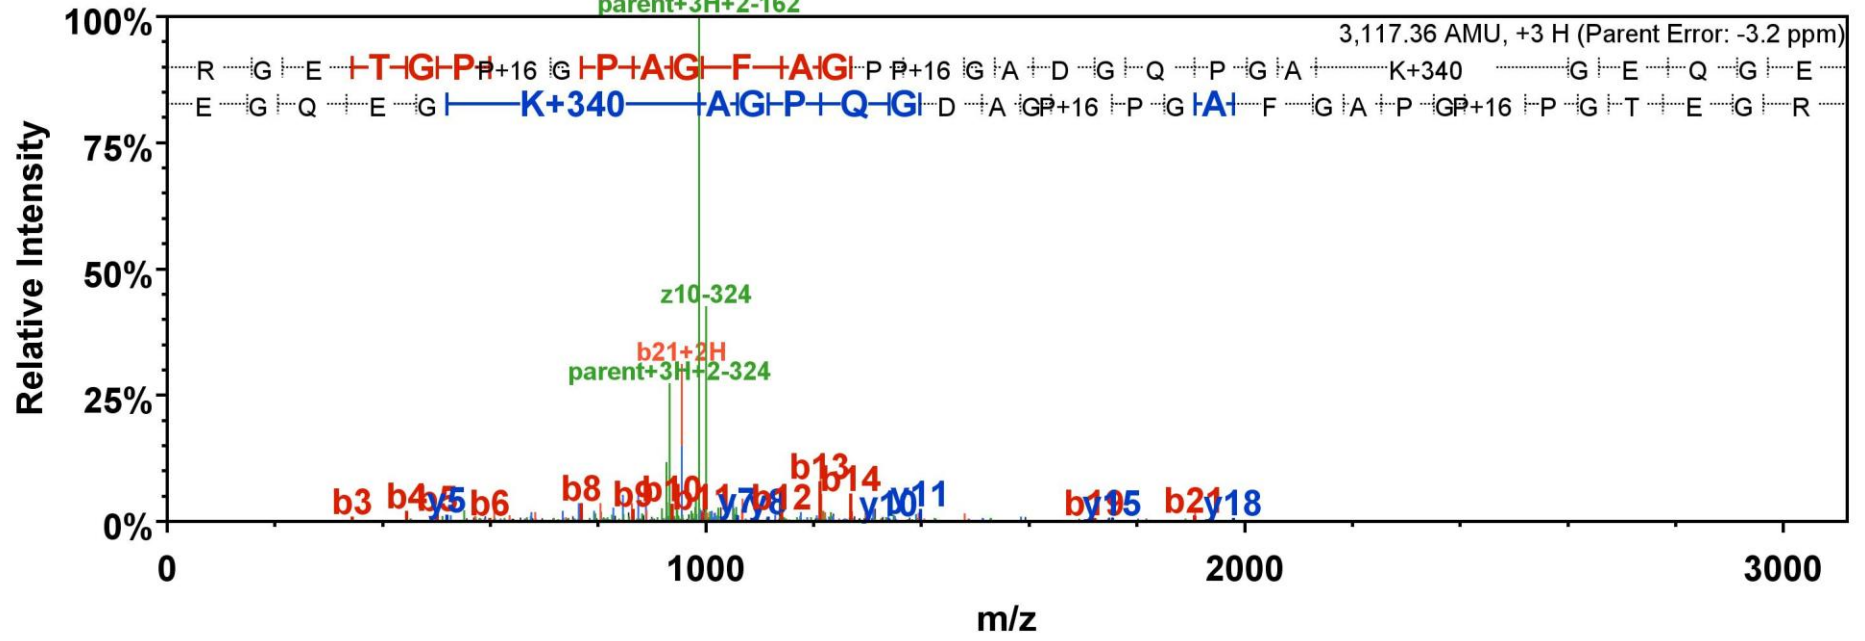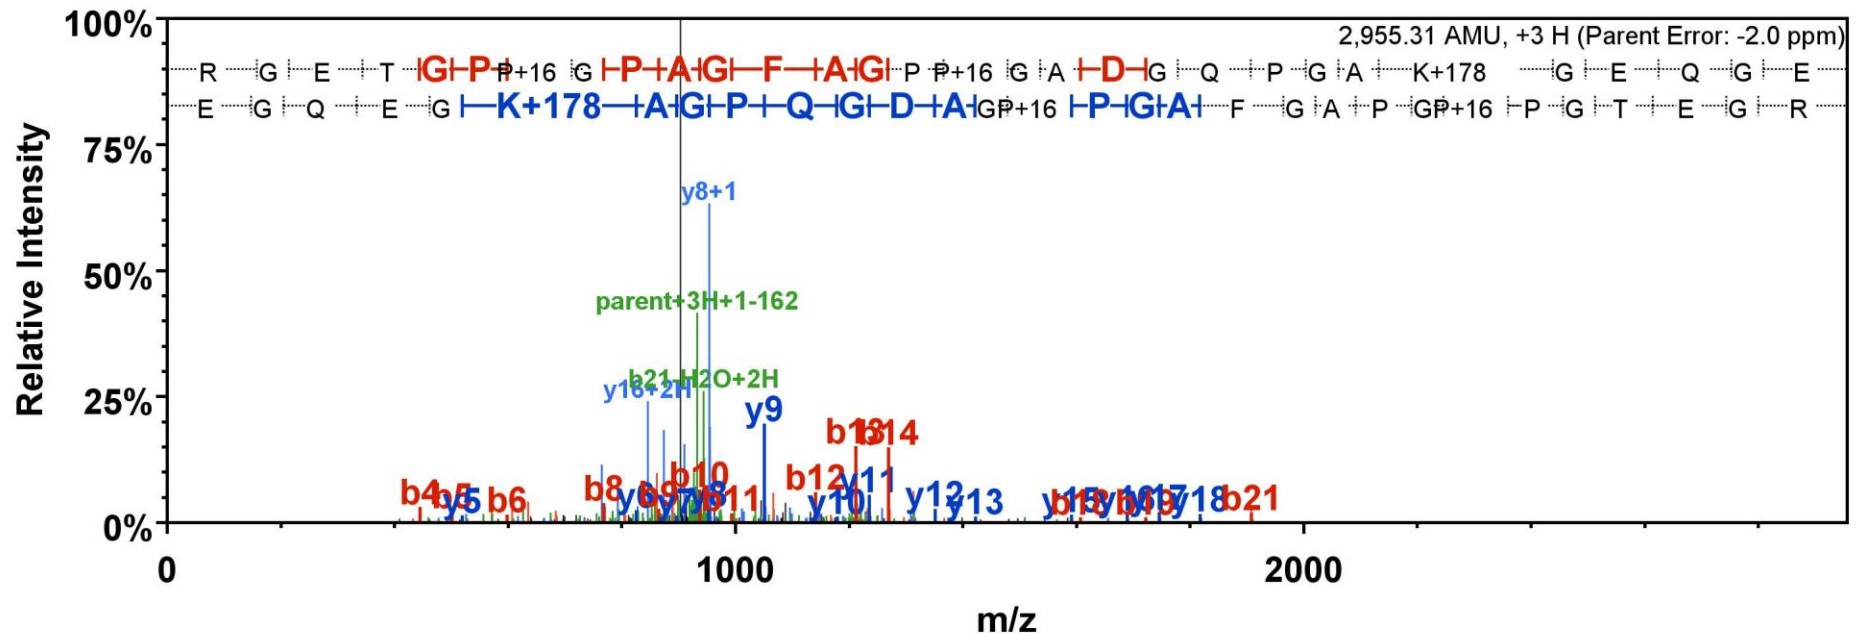

K848

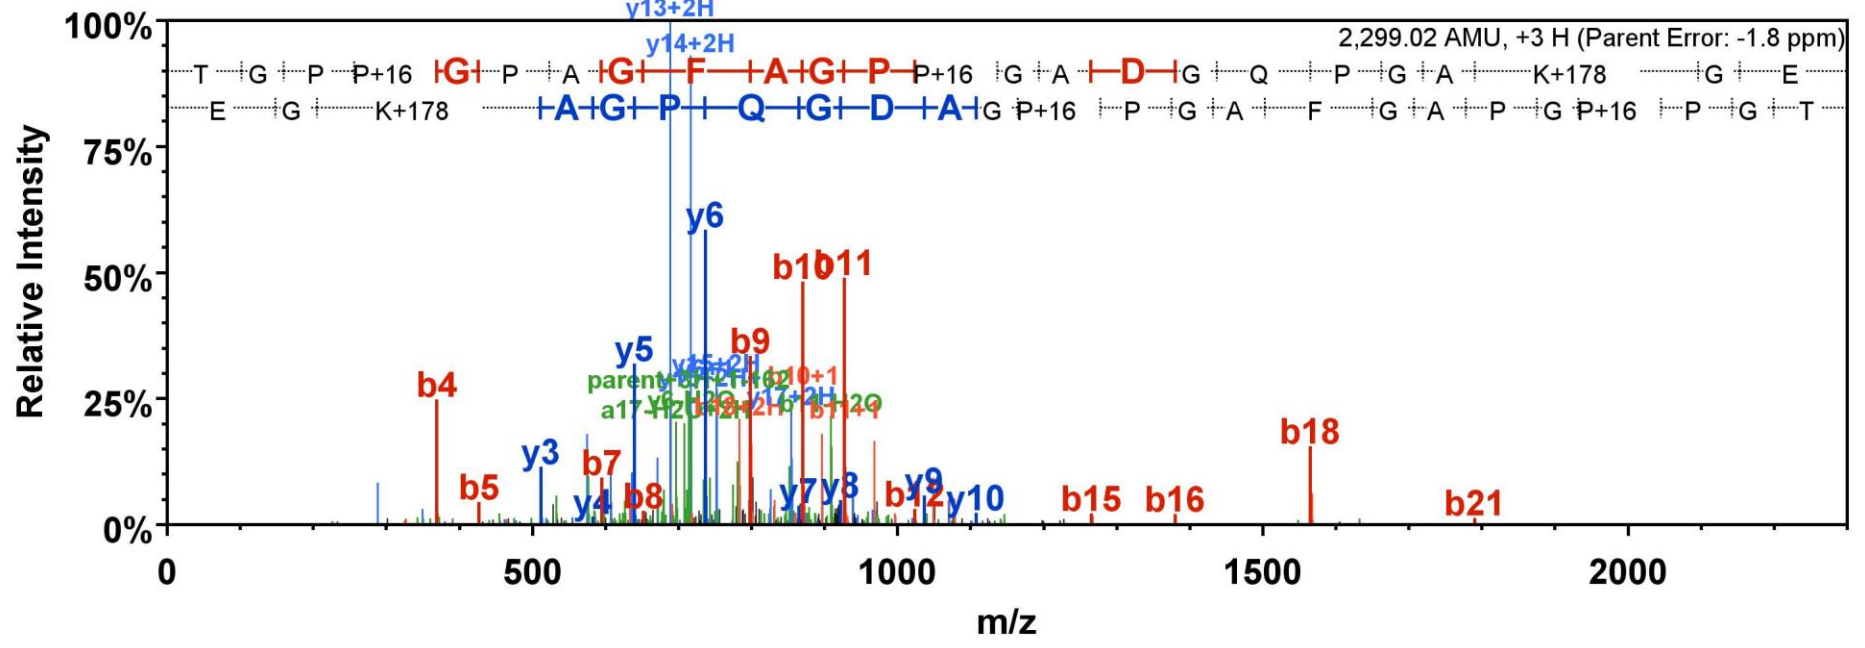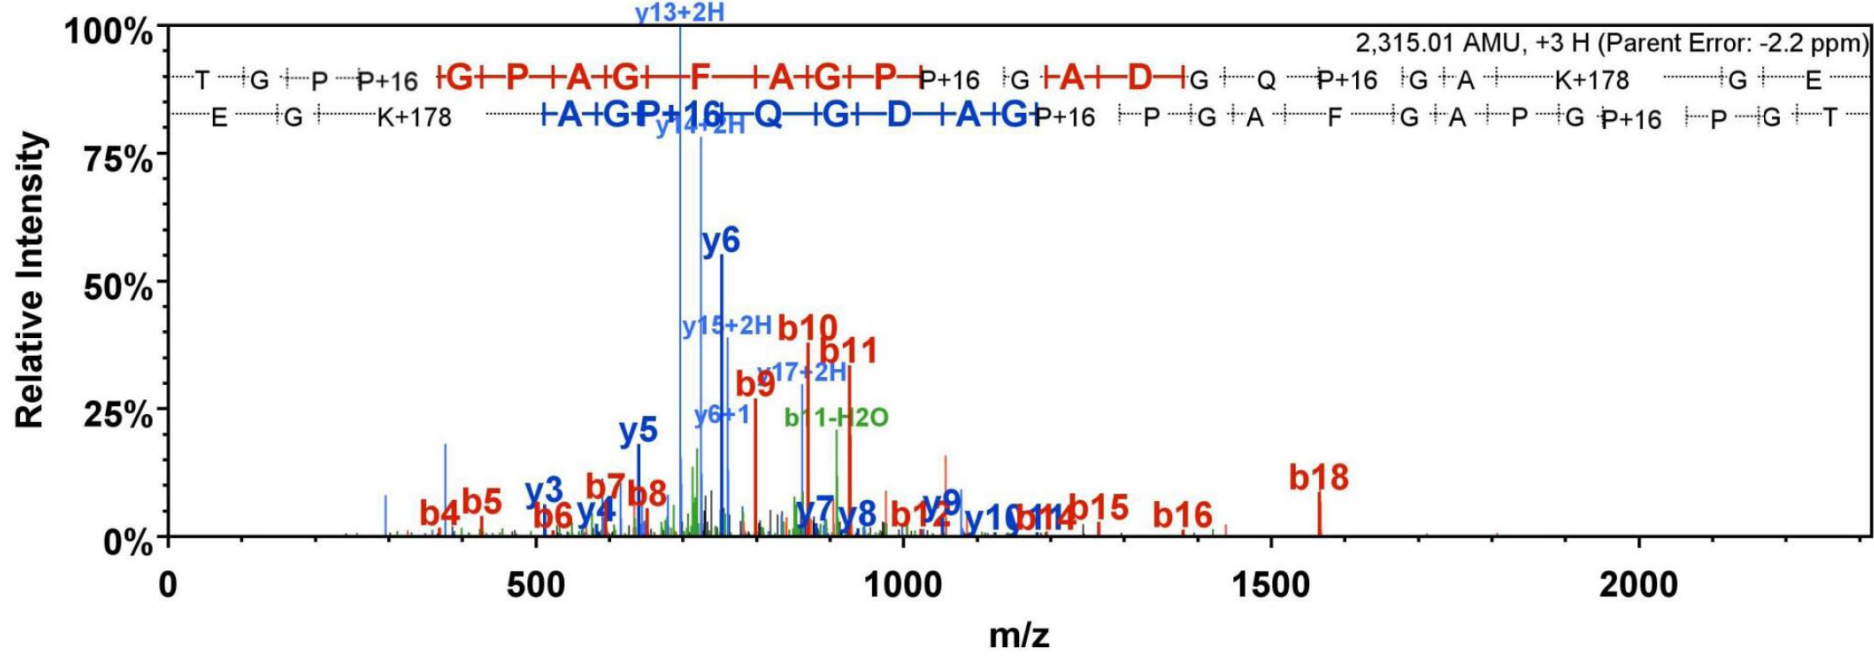

K848

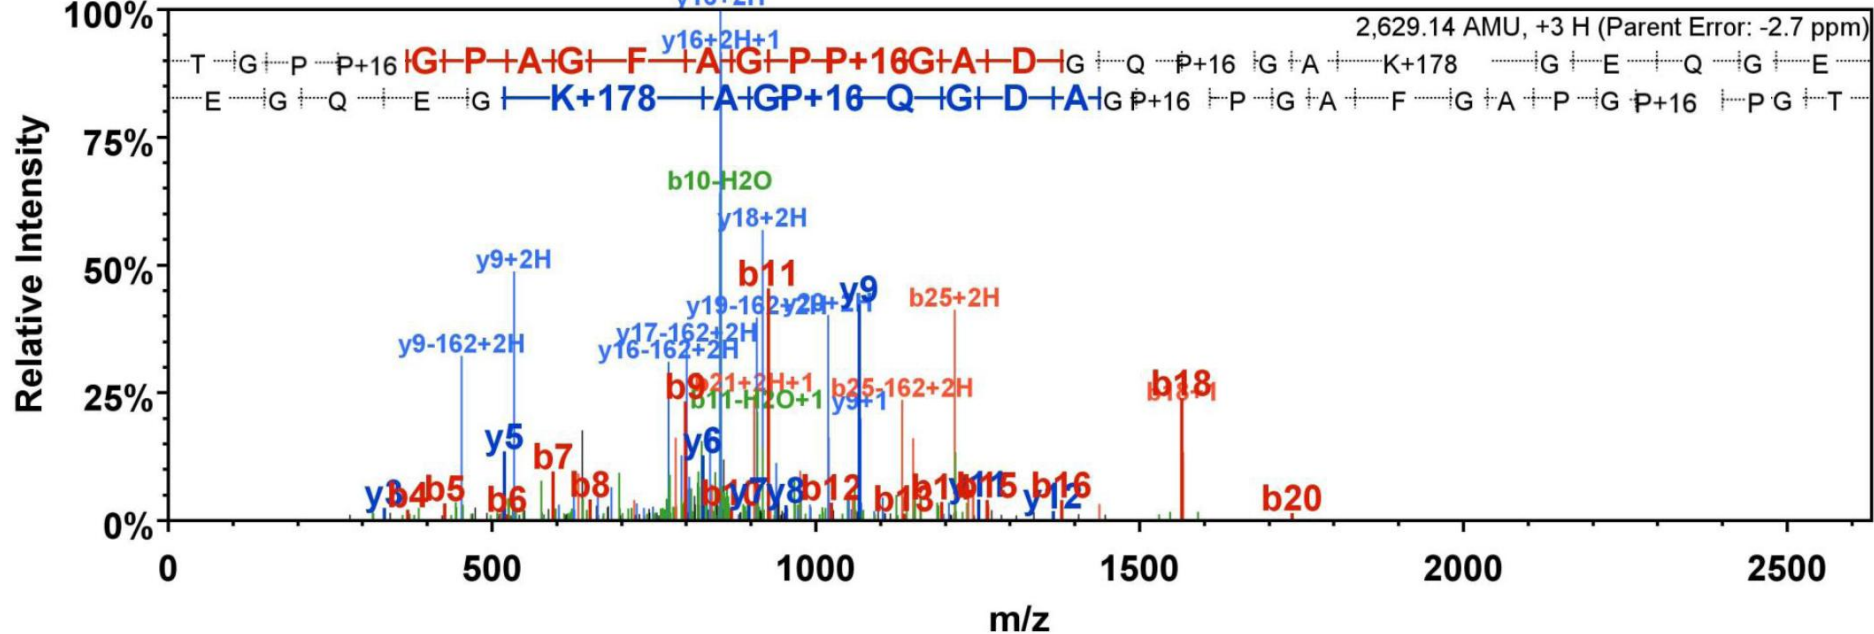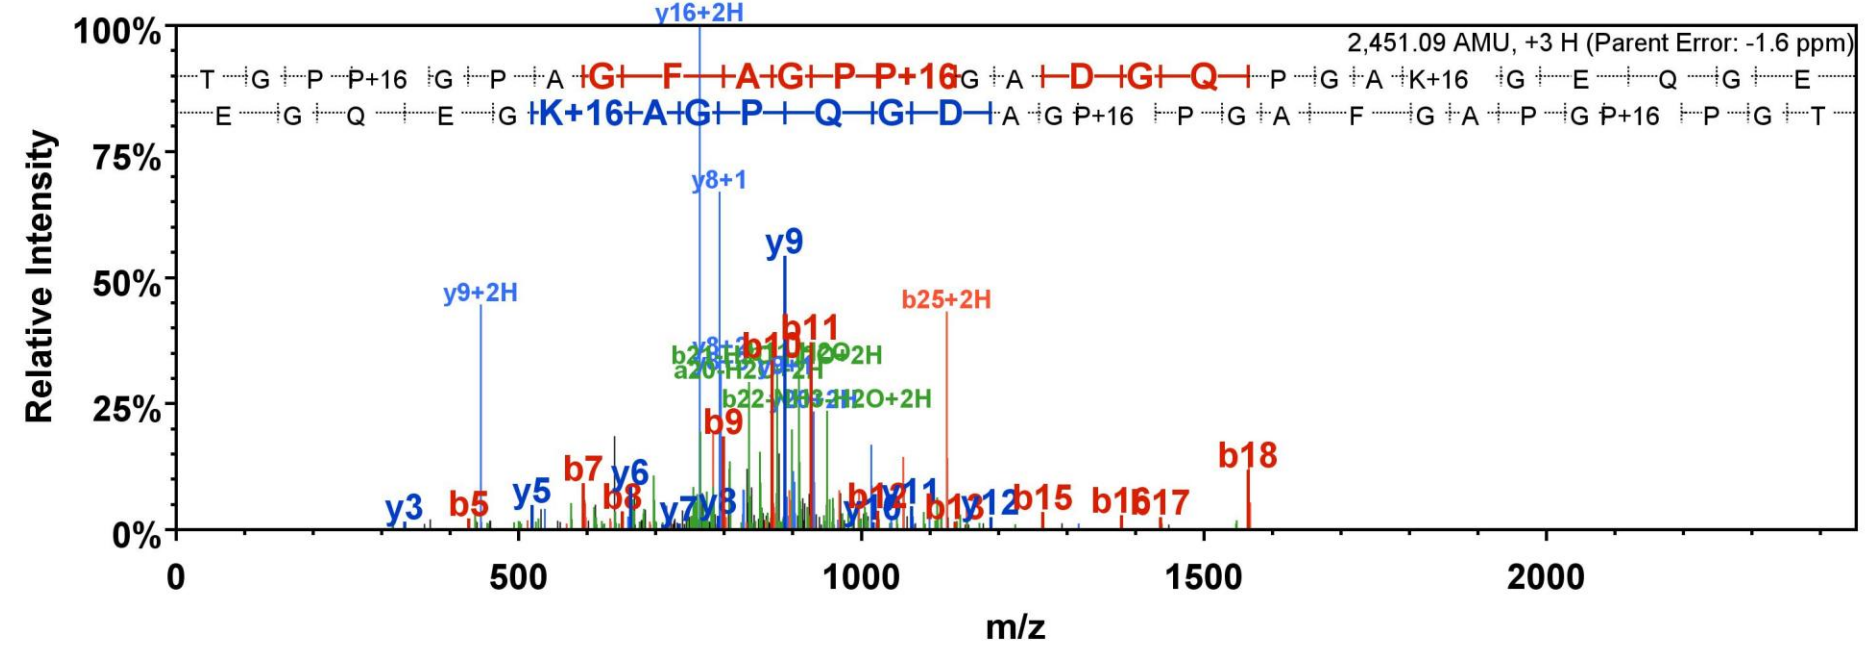





K1055

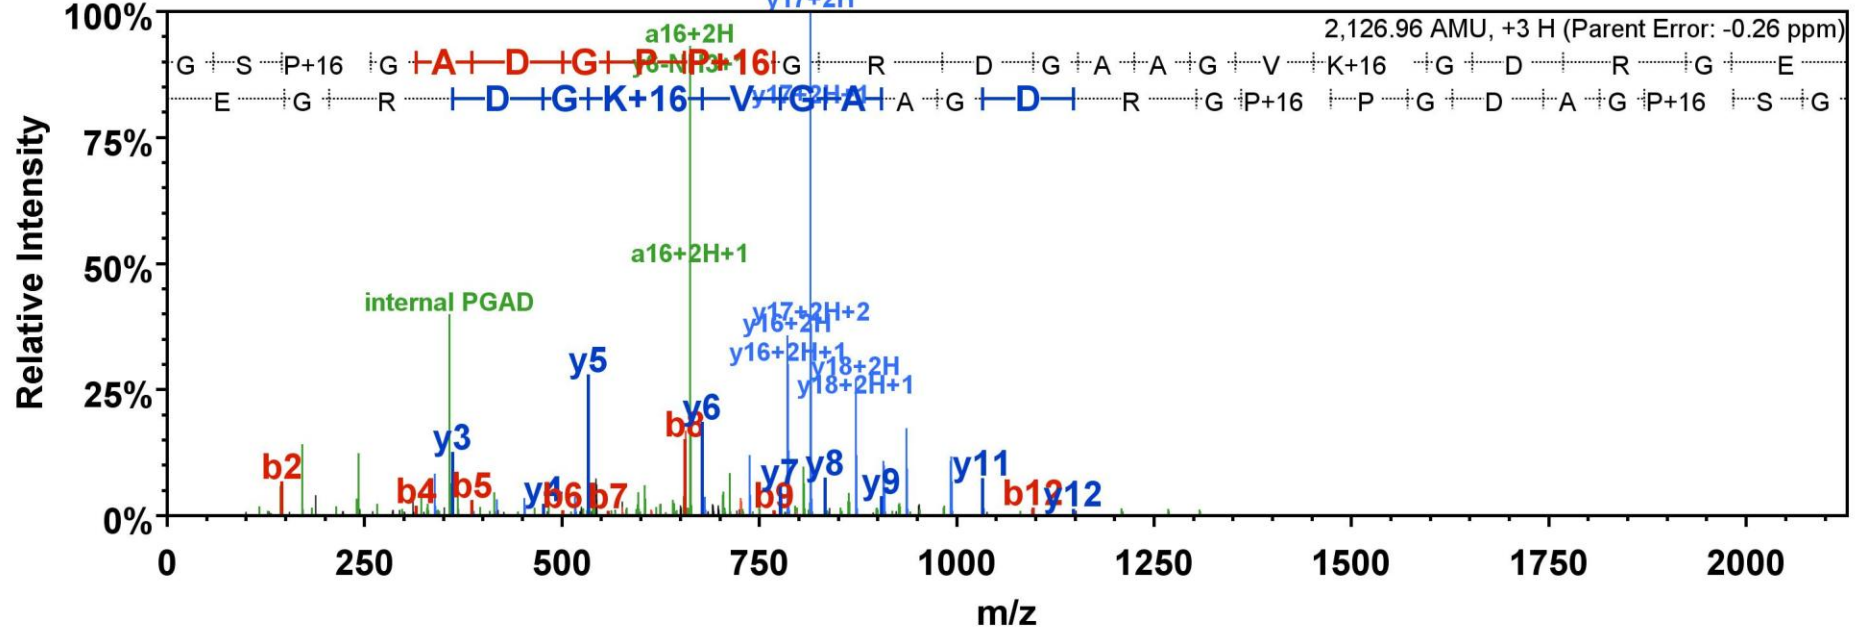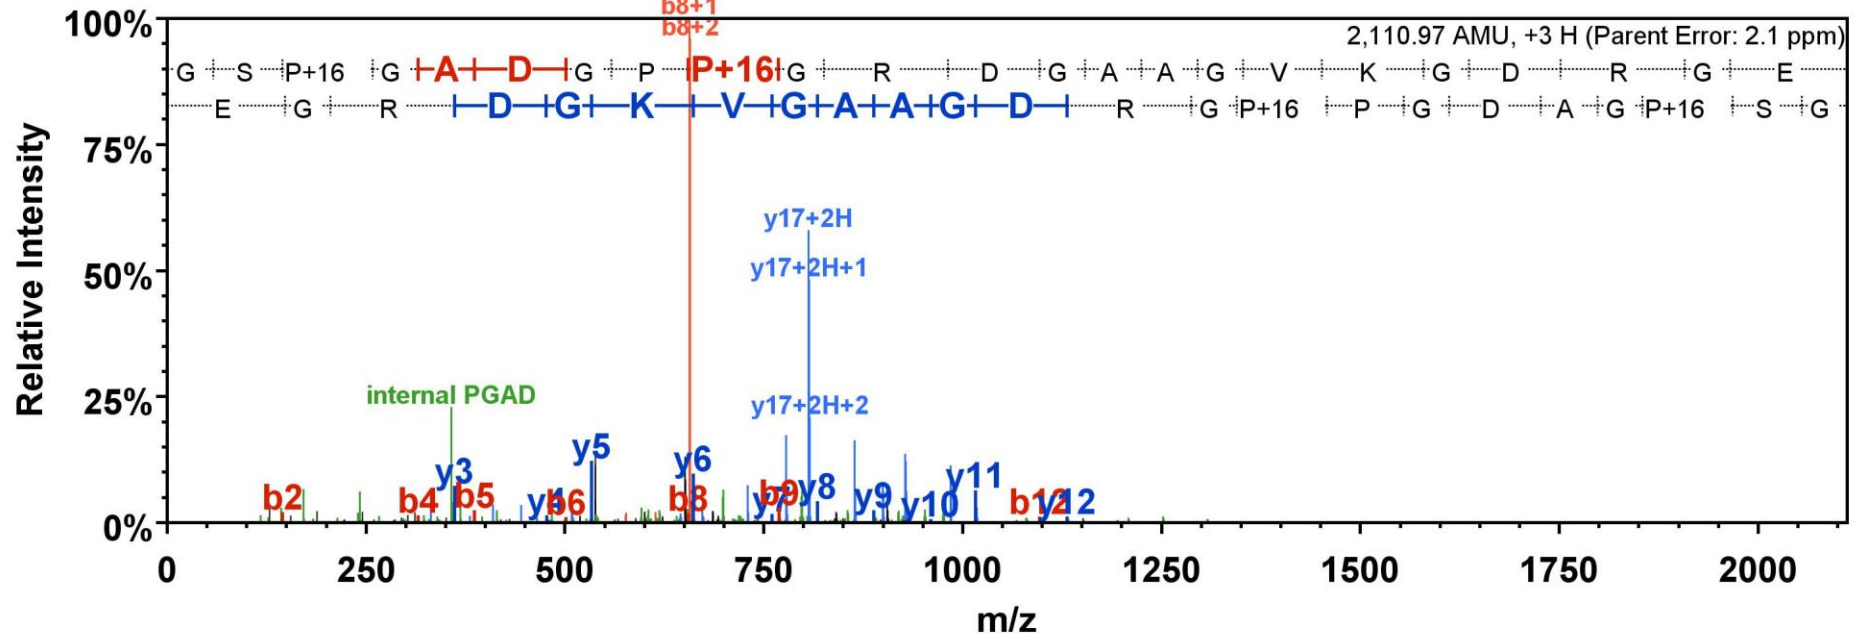



- Gly-Xaa-HyP > Gly-HyP-Yaa
- Gly-HyP-HyP > Gly-HyP-Yaa + Gly-Xaa-HyP
- Gly-HyP-Yaa

# P220 of GpQ

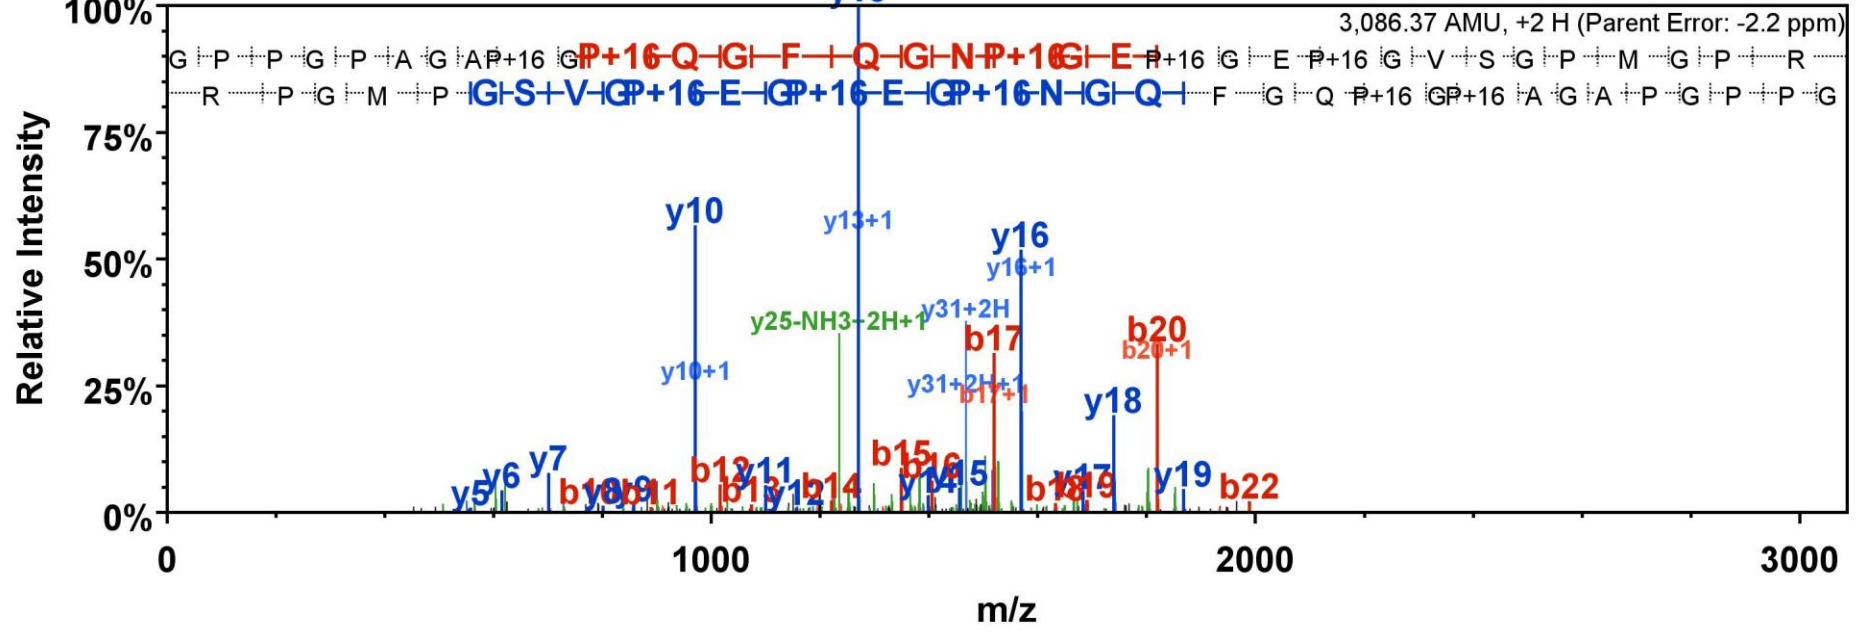

P214 of GpA

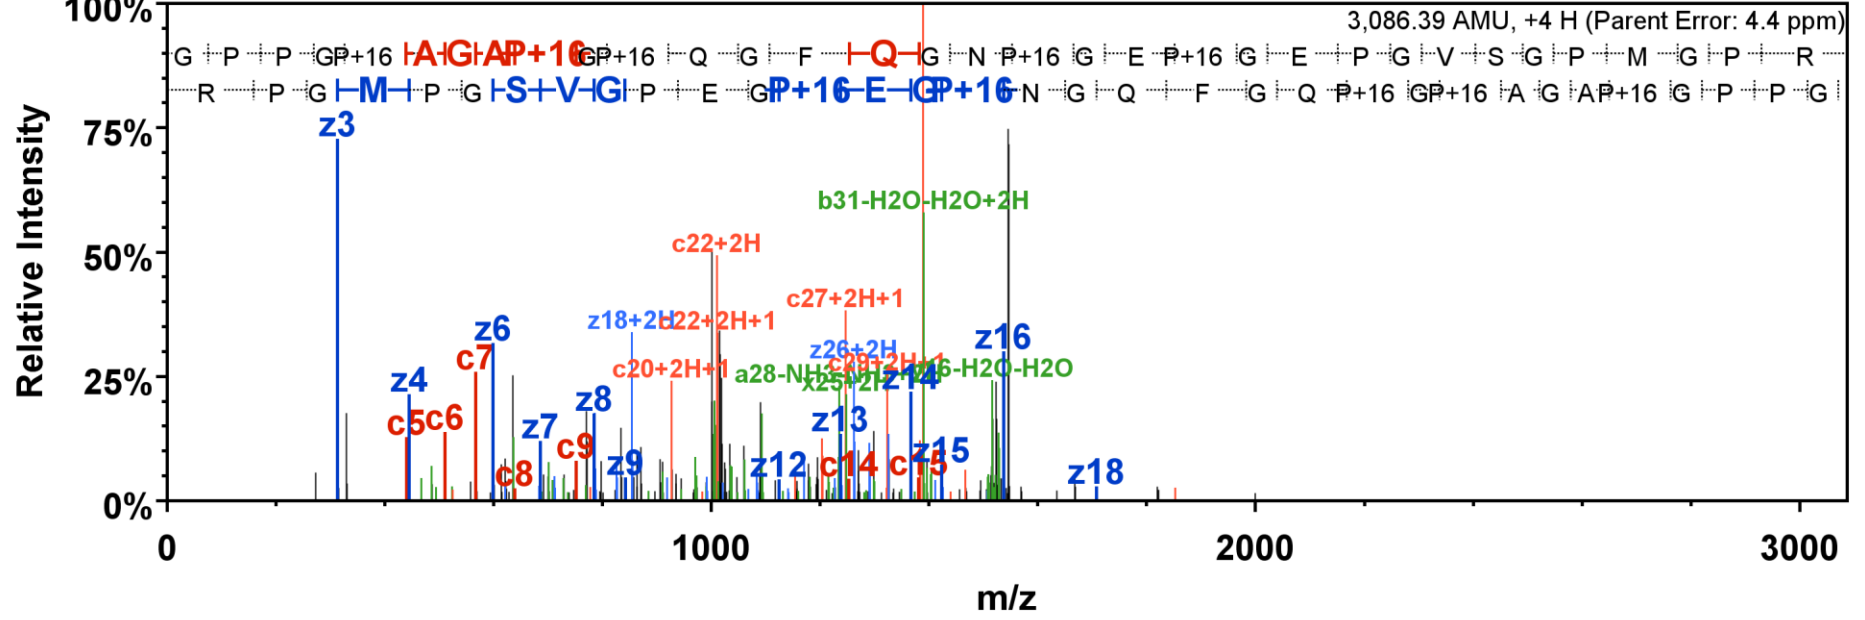

P502 of GpA

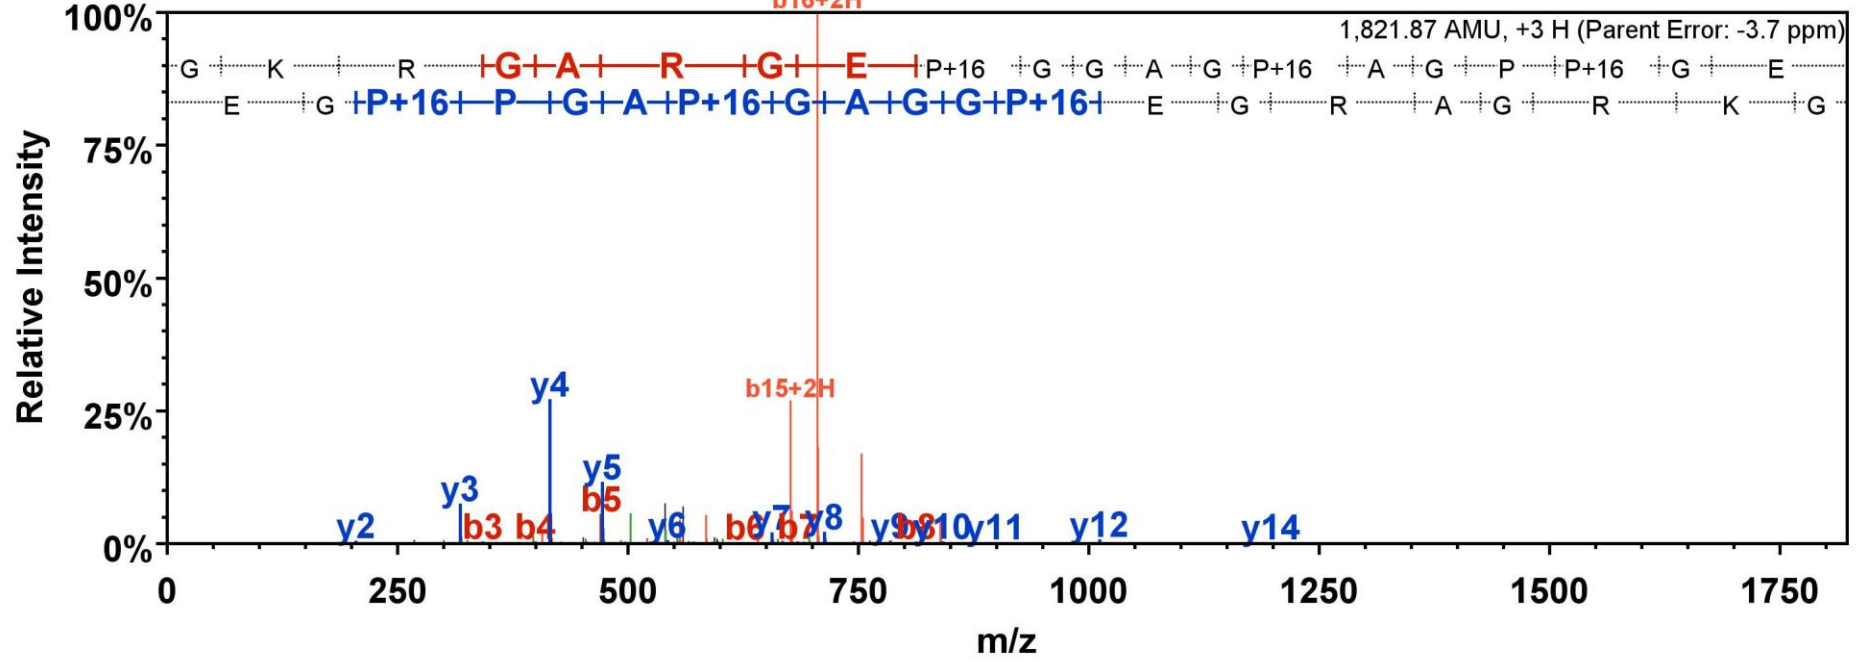

### P646of GpA

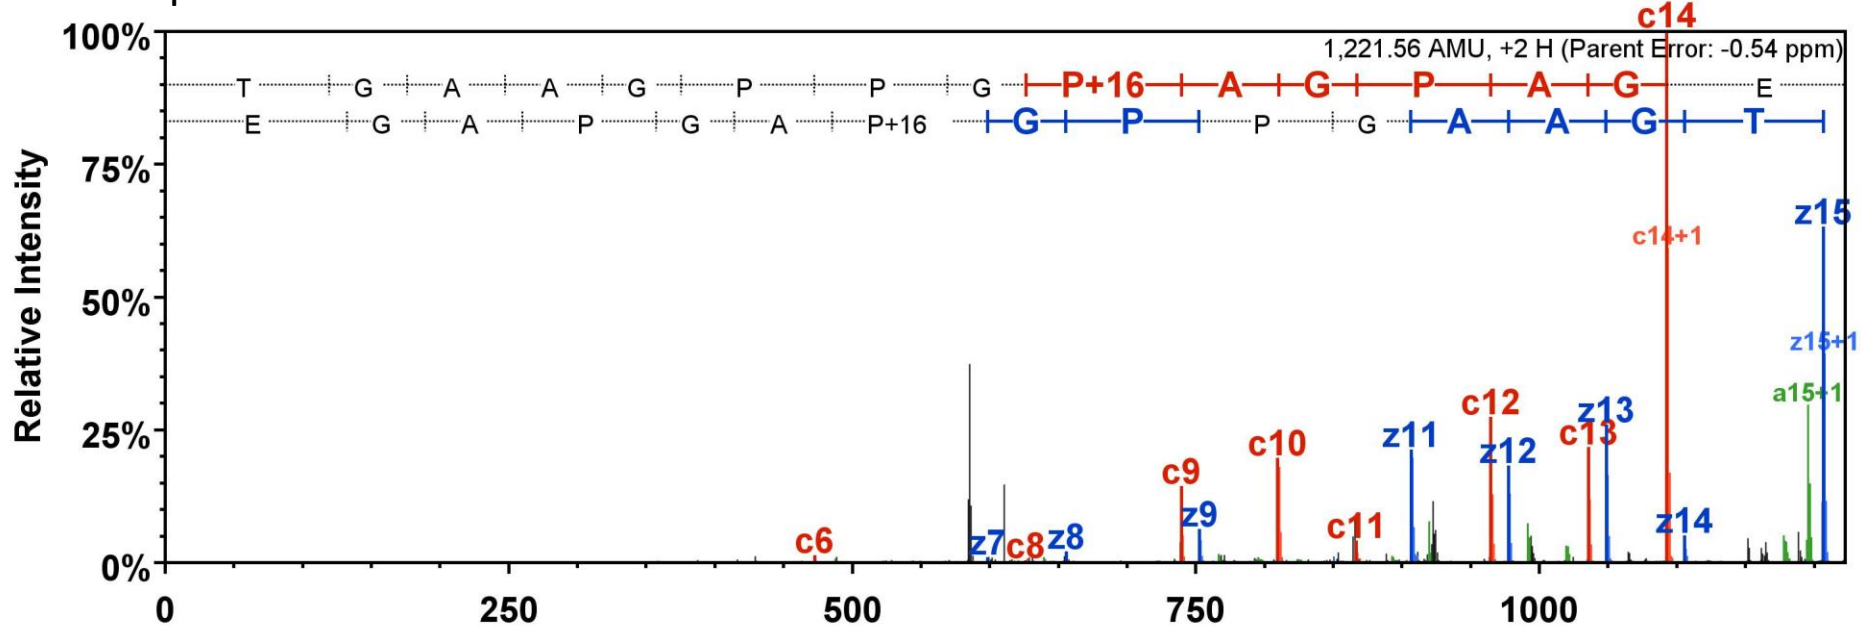

### P649 of GpA

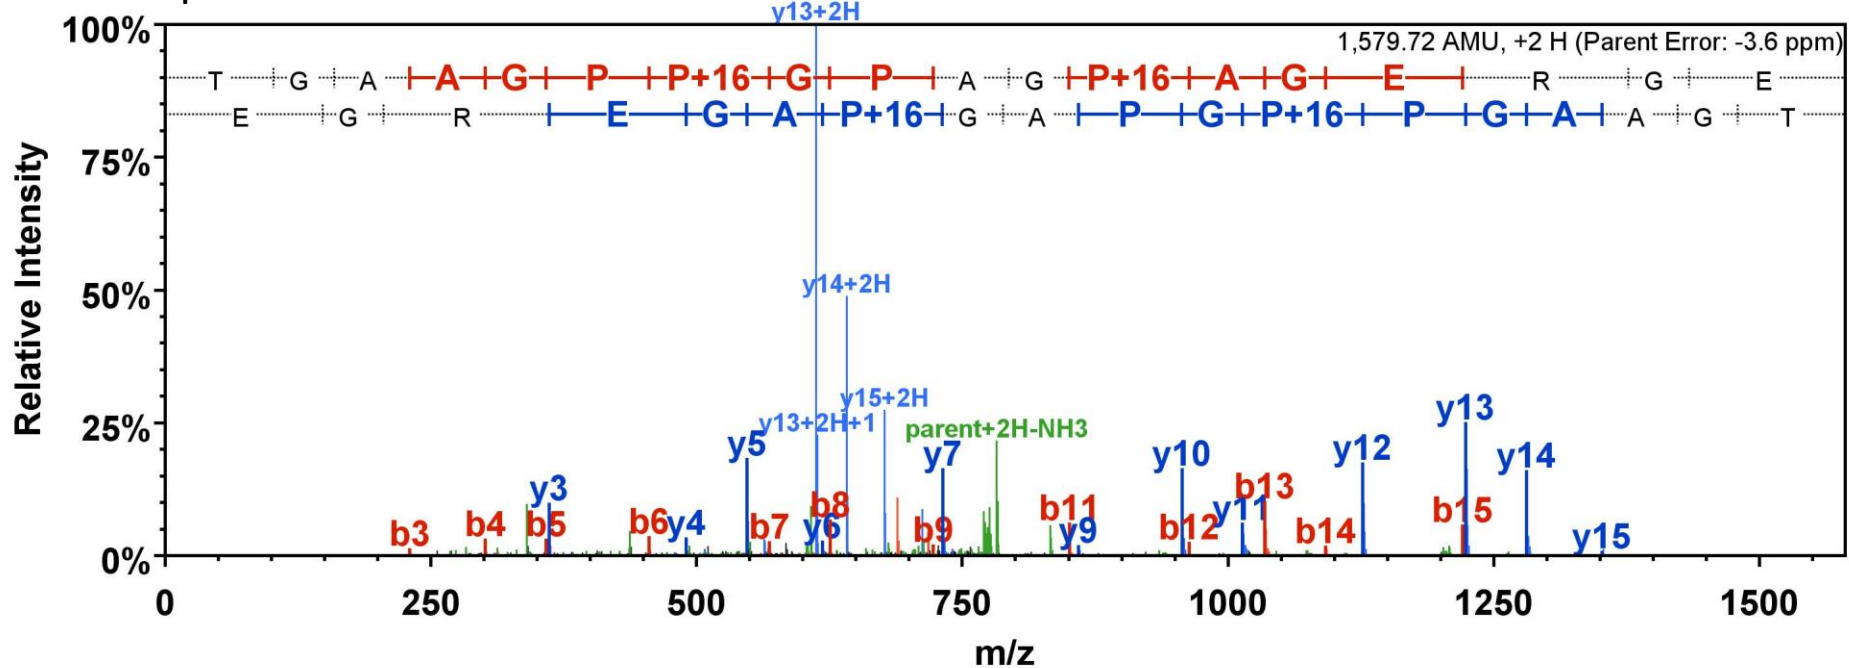

### P1098 of GpA

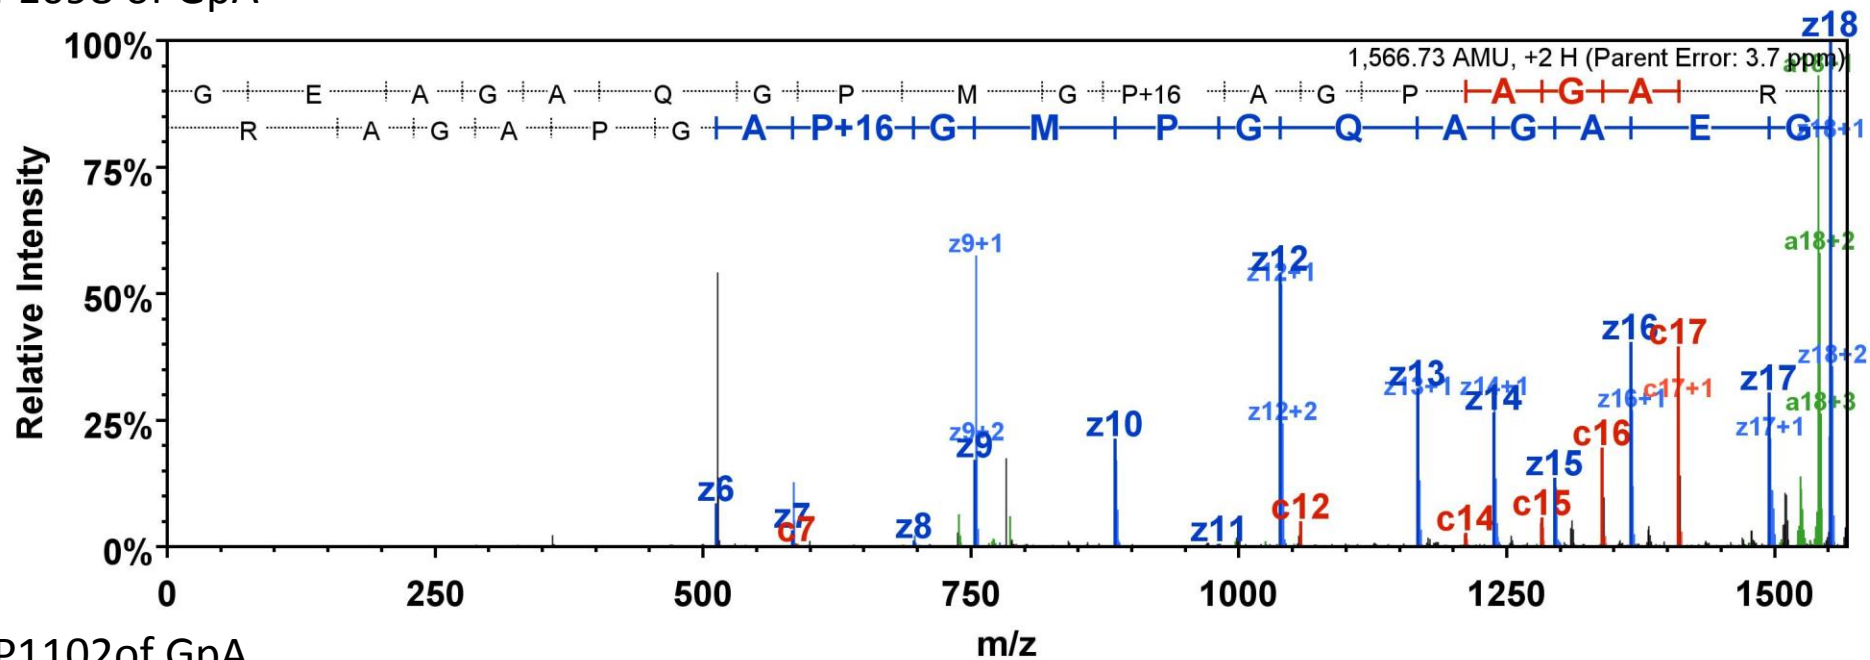

### P1102 of GpA

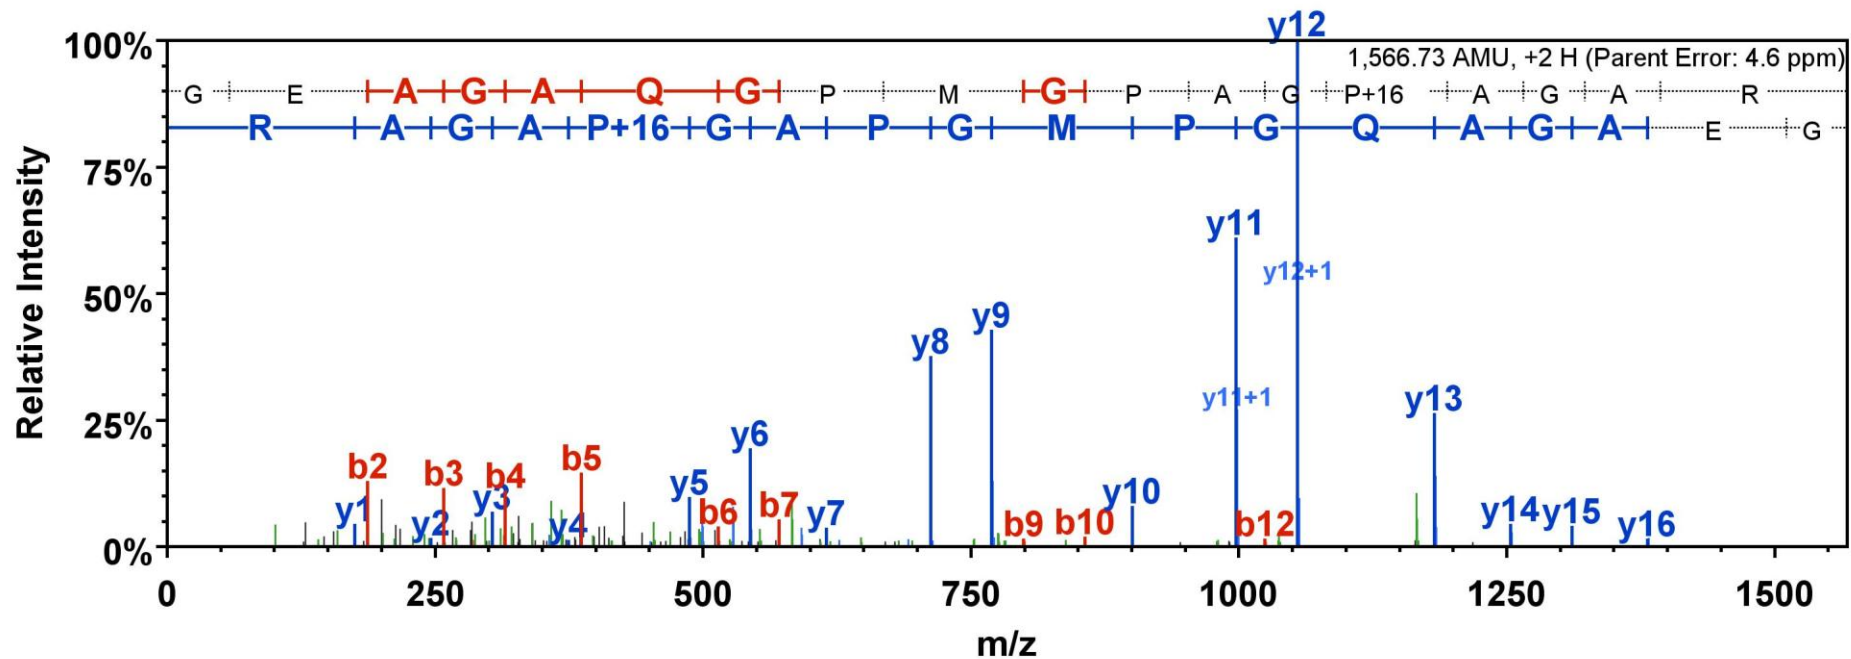

Supplement: NIHMS509233-supplement-1_si_003.pdf [file NIHMS509233-supplement-1_si_003.pdf]
