# Supplementary material
Source: PubMed Central journal article supplement (PMC4866811)
Supplement: NIHMS509233-supplement-2_si_002.pdf [file NIHMS509233-supplement-2_si_002.pdf]

## Supplementary Tables

# LC-MS/MS Identification of the O-Glycosylation and Hydroxylation of Amino Acid Residues of Collagen $\alpha$ -1 (II) chain from Bovine Cartilage

*Ehwang Song, and Yehia Mechref\**

Department of Chemistry and Biochemistry, Texas Tech University, Lubbock, TX

\*Corresponding author

Email: [yehia.mechref@ttu.edu](mailto:yehia.mechref@ttu.edu)

Tel: 806-742-3059

Fax: 806-742-1289

**Keywords:** type II collagen, CO2A1, hydroxylation, glycosylation, glycopeptides, LC-MS/MS, quantitation

**Supplementary Table 1.** List of glycosylation sites of bovine CO2A1 protein that have been identified in 3 different studies compared to the results of this study.

| Glycosylation site | Glc-Gal-HyK        | Gal-HyK            | HyK              | Unmodified K   |
|--------------------|--------------------|--------------------|------------------|----------------|
| 287                | ✓ <sup>a,c,d</sup> | ✓ <sup>c,d</sup>   | ✓ <sup>d</sup>   | N/D            |
| 299                | ✓ <sup>a,c,d</sup> | ✓ <sup>a,d</sup>   | ✓ <sup>d</sup>   | N/D            |
| 308                | ✓ <sup>a,c,d</sup> | ✓ <sup>a,d</sup>   | ✓ <sup>d</sup>   | N/D            |
| 374                | ✓ <sup>b,c,d</sup> | ✓ <sup>b,d</sup>   | ✓ <sup>b,d</sup> | N/D            |
| 419                | ✓ <sup>b,c,d</sup> | ✓ <sup>b,c,d</sup> | ✓ <sup>b,d</sup> | N/D            |
| 452                | ✓ <sup>b,c,d</sup> | ✓ <sup>b,c,d</sup> | ✓ <sup>b,d</sup> | N/D            |
| 464                | ✓ <sup>b,d</sup>   | ✓ <sup>b,d</sup>   | ✓ <sup>b,d</sup> | ✓ <sup>d</sup> |
| 470                | ✓ <sup>b,d</sup>   | ✓ <sup>b,d</sup>   | ✓ <sup>b,d</sup> | ✓ <sup>d</sup> |
| 527                | ✓ <sup>b,c,d</sup> | ✓ <sup>b,c,d</sup> | ✓ <sup>b,d</sup> | ✓ <sup>d</sup> |
| 542                | ✓ <sup>b,c,d</sup> | ✓ <sup>b,c,d</sup> | ✓ <sup>b,d</sup> | ✓ <sup>d</sup> |
| 608                | ✓ <sup>c,d</sup>   | ✓ <sup>a,d</sup>   | ✓ <sup>a,d</sup> | ✓ <sup>d</sup> |
| 620                | ✓ <sup>c,d</sup>   | ✓ <sup>a,c,d</sup> | ✓ <sup>a,d</sup> | ✓ <sup>d</sup> |
| 731                | ✓ <sup>a,c,d</sup> | ✓ <sup>a,c,d</sup> | ✓ <sup>a,d</sup> | ✓ <sup>d</sup> |
| 764                | ✓ <sup>c,d</sup>   | ✓ <sup>a,c,d</sup> | ✓ <sup>d</sup>   | ✓ <sup>d</sup> |
| 773                | N/D                | N/D                | N/D              | ✓ <sup>d</sup> |
| 803                | ✓ <sup>a,c,d</sup> | ✓ <sup>a,c,d</sup> | ✓ <sup>d</sup>   | ✓ <sup>d</sup> |
| 848                | ✓ <sup>d</sup>     | ✓ <sup>d</sup>     | ✓ <sup>d</sup>   | ✓ <sup>d</sup> |
| 857                | ✓ <sup>d</sup>     | ✓ <sup>d</sup>     | ✓ <sup>d</sup>   | ✓ <sup>d</sup> |
| 884                | ✓ <sup>c,d</sup>   | ✓ <sup>d</sup>     | ✓ <sup>d</sup>   | ✓ <sup>d</sup> |
| 929                | ✓ <sup>d</sup>     | ✓ <sup>d</sup>     | ✓ <sup>d</sup>   | N/D            |
| 956                | ✓ <sup>c,d</sup>   | ✓ <sup>d</sup>     | ✓ <sup>d</sup>   | ✓ <sup>d</sup> |
| 1055               | ✓ <sup>d</sup>     | ✓ <sup>d</sup>     | ✓ <sup>d</sup>   | ✓ <sup>d</sup> |
| 1118               | ✓ <sup>d</sup>     | ✓ <sup>d</sup>     | ✓ <sup>d</sup>   | N/D            |
| 1130               | N/D                | N/D                | N/D              | N/D            |

<sup>a</sup>. Butler & Francis *et al*,<sup>21-23</sup> <sup>b</sup>. Seyer *et al*,<sup>53</sup> <sup>c</sup>. Taga *et al*,<sup>47</sup> and <sup>d</sup>. This study

\* <sup>c</sup>. Taga *et al* have only reported the identification of glycosylated forms since they applied hydrazide chemistry based enrichment.

**Supplementary Table 2.** Lists of all modified peptide sequences used for quantitation including peptide sequence, observed  $m/z$  values, mass accuracy (ppm) and retention time (RT) associated with each modifications.

| Glycosylation Site | Sequence                                         | Glc-Gal-HyK    |       |       | Gal-HyK        |       |          | HyK            |       |       | Unmodified K   |     |    |
|--------------------|--------------------------------------------------|----------------|-------|-------|----------------|-------|----------|----------------|-------|-------|----------------|-----|----|
|                    |                                                  | Observed $m/z$ | ppm   | RT    | Observed $m/z$ | ppm   | RT       | Observed $m/z$ | ppm   | RT    | Observed $m/z$ | ppm | RT |
| K287               | GFpGTPGLpGVkGHR                                  | 616.9712       | 1.15  | 19.07 | 562.9531       | 0.37  | 19.50    | 508.9358       | -0.73 | 19.67 | N/D            |     |    |
|                    | GFpGTpGLpGVkGHR                                  | 622.3024       | 0.23  | 16.55 | 568.2844       | -0.45 | 16.81    | 514.2676       | -0.73 | 17.22 |                |     |    |
|                    | GFpGTPGLpGVk                                     | N/D            |       |       | N/D            |       |          | 587.8090       | 0.36  | 37.65 |                |     |    |
|                    | GFpGTpGLpGVk                                     | N/D            |       |       | N/D            |       |          | 595.8071       | -0.73 | 31.68 |                |     |    |
| K299               | GYpGLDGAkGEAGApGVk<br>GESGSPGENGSpGPMGPR         | 925.4091       | 3.34  | 27.03 | 884.8963       | 3.04  | 28.47    | 844.3880       | -2.66 | 28.83 | N/D            |     |    |
|                    | GYpGLDGAkGEAGApGVk<br>GESGSPGEDGSpGPMGPR         | N/D            |       |       | 885.1441       | 1.00  | 30.66    | 844.6310       | 0.90  | 30.58 |                |     |    |
|                    | GYpGLDGAkGEAGApGVk<br>GESGSpGENGSpGPMGPR         | 929.4114       | -0.52 | 25.67 | 888.8970       | 0.80  | 26.17    | 848.3858       | -1.52 | 26.94 |                |     |    |
|                    | GYpGLDGAkGEAGApGVk<br>GESGSpGEDGSpGPMGPR         | 929.6575       | -0.62 | 27.54 | 889.1449       | -1.33 | 28.38    | 848.6306       | -0.11 | 29.06 |                |     |    |
|                    | GYpGLDGAkGEAGApGVk<br>GESGSpGENGSpGPMGPR         | 933.4132       | -3.81 | 21.09 | 892.8997       | -3.65 | 21.59    | 852.3801       | 3.68  | 21.84 |                |     |    |
|                    | GYpGLDGAkGEAGApGVk<br>GESGSpGEDGSpGPMGPR         | 933.6554       | 0.27  | 22.59 | 893.1426       | -0.17 | 23.27    | 852.6287       | 0.63  | 24.13 |                |     |    |
|                    | GYpGLDGAkGEAGApGV(k<br>GG)GESGSpGENGSpGPM<br>GPR | 1010.4374      | -0.07 | 24.30 | 969.9250       | -0.90 | 25.24    | N/D            |       |       |                |     |    |
|                    | GYpGLDGAkGEAGApGV(k<br>GG)GESGSpGEDGSpGPM<br>GPR | 1010.6834      | -0.07 | 25.70 | 970.1700       | 0.13  | 26.86    |                |       |       |                |     |    |
|                    | GYpGLDGAkGEAGApGV(k<br>G)GESGSpGENGSpGPMG<br>PR  | 969.9250       | -0.90 | 25.24 | N/D            |       |          |                |       |       |                |     |    |
|                    | GYpGLDGAkGEAGApGV(k<br>G)GESGSpGEDGSpGPMG<br>PR  | 970.1700       | 0.13  | 26.86 | N/D            |       |          |                |       |       |                |     |    |
|                    | GYpGLDGAkGEAGApGVk                               | 1016.4667      | -0.47 | 18.15 | 935.4372       | 2.81  | 18.57    | 854.4137       | -1.17 | 19.33 |                |     |    |
| GYpGLDGAk          | N/D                                              |                |       | N/D   |                |       | 455.2206 | -2.08          | 18.40 |       |                |     |    |

| Glycosylation Site                      | Sequence                                | Glc-Gal-HyK  |       |       | Gal-HyK      |       |       | HyK          |       |       | Unmodified K |       |       |  |  |
|-----------------------------------------|-----------------------------------------|--------------|-------|-------|--------------|-------|-------|--------------|-------|-------|--------------|-------|-------|--|--|
|                                         |                                         | Observed m/z | ppm   | RT    |  |  |
| K308                                    | GEAGApGVkGESGSPGEDGSpGPMGPR             | N/D          |       |       | N/D          |       |       | 829.0360     | -0.94 | 22.08 | N/D          |       |       |  |  |
|                                         | GEAGApGVkGESGSpGENGSpGPMGPR             | 942.0771     | -3.21 | 17.49 | 888.0597     | -3.64 | 17.87 | 834.0407     | -2.21 | 18.08 |              |       |       |  |  |
|                                         | GEAGApGVkGESGSpGEDGSpGPMGPR             | 942.4054     | -3.53 | 18.48 | 888.3865     | -2.28 | 19.11 | 834.3699     | -3.64 | 19.52 |              |       |       |  |  |
|                                         | GYpGLDGakGEAGApGVkGESGSPGENGSpGPMGPR    | N/D          |       |       | N/D          |       |       | 854.4137     | -1.17 | 19.33 |              |       |       |  |  |
|                                         | GYpGLDGakGEAGApGVkGESGSPGEDGSpGPMGPR    |              |       |       |              |       |       | 844.3880     | -2.66 | 21.84 |              |       |       |  |  |
|                                         | GYpGLDGakGEAGApGVkGESGSpGENGSpGPMGPR    |              |       |       |              |       |       | 844.6310     | 0.90  | 21.92 |              |       |       |  |  |
|                                         | GYpGLDGakGEAGApGVkGESGSpGEDGSpGPMGPR    |              |       |       |              |       |       | 848.3858     | -1.52 | 26.94 |              |       |       |  |  |
|                                         | GYpGLDGakGEAGApGVkGESGSpGENGSpGPMGPR    |              |       |       |              |       |       | 848.6306     | -0.11 | 29.06 |              |       |       |  |  |
|                                         | GYpGLDGakGEAGApGVkGESGSpGEDGSpGPMGPR    |              |       |       |              |       |       | 852.3801     | 3.68  | 21.84 |              |       |       |  |  |
|                                         | GYpGLDGakGEAGApGVkGESGSpGEDGSpGPMGPR    |              |       |       |              |       |       | 852.6287     | 0.63  | 24.13 |              |       |       |  |  |
|                                         | GYpGLDGA(kG)GEAGApGVk                   |              |       |       |              |       |       | 935.4372     | 2.81  | 18.57 |              |       |       |  |  |
|                                         | GYpGLDGA(kG)GEAGApGVkGESGSPGENGSpGPMGPR |              |       |       |              |       |       | 884.8963     | 3.04  | 28.47 |              |       |       |  |  |
|                                         | GYpGLDGA(kG)GEAGApGVkGESGSPGEDGSpGPMGPR |              |       |       |              |       |       | 885.1441     | 1.00  | 30.66 |              |       |       |  |  |
|                                         | GYpGLDGA(kG)GEAGApGVkGESGSpGENGSpGPMGPR |              |       |       |              |       |       | 969.9250     | -0.90 | 25.24 |              |       |       |  |  |
|                                         | GYpGLDGA(kG)GEAGApGVkGESGSpGEDGSpGPMGPR |              |       |       |              |       |       | 970.1700     | 0.13  | 26.86 |              |       |       |  |  |
| GYpGLDGA(kG)GEAGApGVkGESGSpGENGSpGPMGPR | N/D                                     |              |       |       |              |       |       | N/D          |       |       | 888.8970     | 0.80  | 26.17 |  |  |
| GYpGLDGA(kG)GEAGApGVkGESGSpGEDGSpGPMGPR |                                         |              |       |       |              |       |       |              |       |       | 889.1449     | -1.33 | 28.38 |  |  |

| Glycosylation Site | Sequence                                 | Glc-Gal-HyK  |       |       | Gal-HyK      |       |       | HyK          |       |       | Unmodified K |     |    |
|--------------------|------------------------------------------|--------------|-------|-------|--------------|-------|-------|--------------|-------|-------|--------------|-----|----|
|                    |                                          | Observed m/z | ppm   | RT    | Observed m/z | ppm   | RT    | Observed m/z | ppm   | RT    | Observed m/z | ppm | RT |
|                    | GYpGLDGA(kG)GEAGApGVkGESGSpGENGSpGPmGPR  | N/D          |       |       |              |       |       | 892.8997     | -3.65 | 21.59 | N/D          |     |    |
|                    | GYpGLDGA(kG)GEAGApGVkGESGSpGEDGSpGPmGPR  |              |       |       |              |       |       | 893.1426     | -0.17 | 23.27 |              |     |    |
|                    | GYpGLDGA(kGG)GEAGApGVk                   |              |       |       |              |       |       | 1016.4667    | -0.47 | 18.15 |              |     |    |
|                    | GYpGLDGA(kGG)GEAGApGVkGESGSPGENGSpGPMGPR |              |       |       |              |       |       | 925.4091     | 3.34  | 27.03 |              |     |    |
|                    | GYpGLDGA(kGG)GEAGApGVkGESGSpGENGSpGPMGPR | 1010.4374    | -0.07 | 24.30 | 969.9250     | -0.90 | 25.24 | 929.4114     | -0.52 | 25.67 |              |     |    |
|                    | GYpGLDGA(kGG)GEAGApGVkGESGSpGEDGSpGPMGPR | 1010.6834    | -0.07 | 25.70 | 970.1700     | 0.13  | 26.86 | 929.6575     | -0.62 | 27.54 |              |     |    |
|                    | GYpGLDGA(kGG)GEAGApGVkGESGSpGENGSpGPMGPR | N/D          |       |       | N/D          |       |       | 933.4132     | -3.81 | 21.09 |              |     |    |
|                    | GYpGLDGA(kGG)GEAGApGVkGESGSpGEDGSpGPMGPR |              |       |       |              |       |       | 933.6554     | 0.27  | 22.59 |              |     |    |
| K374               | GNDGQpGPAGPpGPVGPAGGPGFPGApGAKGEAGPTGAR  | 930.6826     | -0.12 | 36.42 | 890.1699     | -0.69 | 36.93 | 849.6553     | 0.91  | 37.57 | N/D          |     |    |
|                    | GNDGQpGPAGPpGPVGPAGGPGFPGApGAKGEAGPTGAR  | 930.6821     | 0.41  | 37.85 | 890.1693     | -0.02 | 38.61 | 849.6579     | -2.15 | 39.03 |              |     |    |
|                    | GNDGQpGPAGPpGPVGPAGGPGFPGApGAKGEAGPTGAR  | 934.6813     | -0.09 | 34.97 | 894.1680     | 0.01  | 35.36 | 853.6544     | 0.47  | 35.99 |              |     |    |

| Glycosylation Site                       | Sequence                                        | Glc-Gal-HyK                                                    |           |       | Gal-HyK      |           |       | HyK          |           |       | Unmodified K |     |    |  |       |     |  |  |  |
|------------------------------------------|-------------------------------------------------|----------------------------------------------------------------|-----------|-------|--------------|-----------|-------|--------------|-----------|-------|--------------|-----|----|--|-------|-----|--|--|--|
|                                          |                                                 | Observed m/z                                                   | ppm       | RT    | Observed m/z | ppm       | RT    | Observed m/z | ppm       | RT    | Observed m/z | ppm | RT |  |       |     |  |  |  |
|                                          | GNDGQpGPAGPpGPVGP<br>AGGPGFpGApGAKGEAGP<br>TGAR | 934.6804                                                       | 0.87      | 36.34 | N/D          |           |       | N/D          |           |       |              |     |    |  |       |     |  |  |  |
|                                          | GDDGQpGPAGPpGPVGP<br>AGGPGFpGApGAKGEAGP<br>TGAR | 934.9276                                                       | -0.41     | 38.78 |              |           |       |              |           |       |              |     |    |  |       |     |  |  |  |
|                                          | GNDGQpGPAGPpGPVGP<br>AGGpGFpGApGAKGEAGP<br>TGAR | 938.6810                                                       | -1.13     | 31.13 | 898.1677     | -1.07     | 31.81 | 857.6535     | 0.04      | 32.32 | N/D          |     |    |  |       |     |  |  |  |
|                                          | GNDGQpGPAGPpGPVGP<br>AGGpGFpGApGAKGEAGP<br>TGAR | 938.6824                                                       | -2.62     | 33.00 | 898.1667     | 0.04      | 33.60 | 857.6534     | 0.15      | 34.12 |              |     |    |  |       |     |  |  |  |
|                                          | GDDGQpGPAGPpGPVGP<br>AGGpGFpGApGAKGEAGP<br>TGAR | 938.9268                                                       | -0.91     | 35.39 | 898.4138     | -1.18     | 36.17 | 857.9000     | -0.55     | 36.51 |              |     |    |  |       |     |  |  |  |
|                                          | GNDGQpGPAGPpGPVGP<br>AGGPGFPGApGAK              | N/D                                                            |           |       | N/D          |           |       | 1300.1111    | 1.36      | 42.37 |              |     |    |  |       |     |  |  |  |
|                                          | GNDGQpGPAGPpGPVGP<br>AGGPGFpGApGAK              |                                                                |           |       |              |           |       | 1308.1128    | -1.89     | 38.53 |              |     |    |  |       |     |  |  |  |
|                                          | GNDGQpGPAGPpGPVGP<br>AGGpGFpGApGAK              |                                                                |           |       |              |           |       | 1316.1046    | 2.42      | 34.80 |              |     |    |  |       |     |  |  |  |
|                                          | K419                                            | GPEGAQGPRGEpGTpGSp<br>GPAGAAGNpGTDGlpGAK<br>GSAGApGIAGApGFpGPR | 1281.3408 | 0.08  | 38.95        | 1240.8229 | 3.67  | 39.88        | 1200.3109 | 2.78  |              |     |    |  | 40.23 | N/D |  |  |  |
|                                          |                                                 | GEpGTpGSpGPAGAAGNp<br>GTDGlpGAKGSAGApGIAG<br>ApGFpGPR          | 1068.9896 | -1.24 | 41.42        | 1028.4764 | -1.29 | 41.94        | 987.9631  | -1.25 |              |     |    |  | 42.20 |     |  |  |  |
| GPEGAQGPRGEpGTpGSp<br>GPAGAAGNpGTDGlpGAK |                                                 | N/D                                                            |           |       | N/D          |           |       | 1072.8337    | -1.81     | 20.70 |              |     |    |  |       |     |  |  |  |
| GEpGTpGSpGPAGAAGNp<br>GTDGlpGAK          |                                                 |                                                                |           |       |              |           |       | 789.6943     | 1.22      | 20.37 |              |     |    |  |       |     |  |  |  |
| GEpGTpGSpGPAGAAGNp<br>GTDGlpGAK          |                                                 |                                                                |           |       |              |           |       | 1192.0347    | 1.45      | 20.03 |              |     |    |  |       |     |  |  |  |

| Glycosylation Site                    | Sequence                                           | Glc-Gal-HyK  |       |       | Gal-HyK      |       |       | HyK          |       |          | Unmodified K |          |       |
|---------------------------------------|----------------------------------------------------|--------------|-------|-------|--------------|-------|-------|--------------|-------|----------|--------------|----------|-------|
|                                       |                                                    | Observed m/z | ppm   | RT    | Observed m/z | ppm   | RT    | Observed m/z | ppm   | RT       | Observed m/z | ppm      | RT    |
| K452                                  | GPpGPQGATGPLGPkGQT<br>GEpGIAGFK                    | 954.4603     | 1.47  | 36.93 | 900.4467     | -2.89 | 37.85 | 841.0947     | -0.01 | 38.86    | N/D          |          |       |
|                                       | GPpGPQGATGPLGPkGQT<br>GEpGIAGFk                    | 949.1299     | 0.17  | 36.51 | 895.1096     | 3.01  | 37.69 | 846.4249     | 1.89  | 38.11    |              |          |       |
|                                       | GPpGPQGATGPLGPkGQT<br>GEpGIAGFKGEQGPK              | 865.1710     | 0.27  | 30.33 | 824.6583     | -0.42 | 31.00 | 784.1453     | -0.61 | 32.02    |              |          |       |
|                                       | GPpGPQGATGPLGPkGQT<br>GEpGIAGFkGEQGPK              | 869.1708     | -0.96 | 29.95 | 828.6561     | 0.80  | 30.62 | 788.1433     | 0.25  | 31.98    |              |          |       |
|                                       | GPpGPQGATGPLGPkGQT<br>GEpGIAGF(kG)GEQGPK           | 909.6833     | -0.14 | 29.18 | 869.1708     | -0.96 | 29.95 | N/D          | N/D   | N/D      |              |          |       |
|                                       | GPpGPQGATGPLGPkGQT<br>GEpGIAGF(kGG)GEQGPK          | 946.1980     | -0.38 | 28.85 | N/D          | N/D   | N/D   |              |       |          |              |          |       |
|                                       | GPpGPQGATGPLGPkGQT<br>GEpGIAGF(kGG)GEQGPK          | 950.1942     | 2.29  | 28.43 |              |       |       |              |       |          |              |          |       |
|                                       | GPpGPQGATGPLGPk                                    | N/D          | N/D   | N/D   | N/D          | N/D   | N/D   | 681.8550     | -0.36 | 18.43    |              |          |       |
|                                       | GppGPQGATGPLGPk                                    |              |       |       |              |       |       | 689.8516     | 0.88  | 17.24    |              |          |       |
| K464                                  | GQTGEpGIAGFkGEQGPK                                 | 705.3309     | 0.27  | 17.41 | 651.3142     | -1.41 | 18.01 | 597.2953     | 0.97  | 18.76    | N/D          |          |       |
|                                       | GQTGEpGIAGFkGEQGPK                                 | 710.6617     | 1.44  | 17.00 | 656.6449     | 0.29  | 17.67 | 602.6273     | 0.36  | 18.26    |              |          |       |
|                                       | GQTGEpGIAGFkGEQGPK<br>GEpGPAGPQGApGPAGEE<br>GK     | 976.4493     | -1.06 | 24.77 | 935.9318     | 3.48  | 37.10 | N/D          | N/D   | N/D      |              |          |       |
|                                       | GQTGEpGIAGFkGEQGP(k<br>G)GEpGPAGPQGApGPAG<br>EEGK  | 1016.9632    | -1.71 | 24.18 | N/D          | N/D   | N/D   |              |       |          |              |          |       |
|                                       | GQTGEpGIAGFkGEQGP(k<br>GG)GEpGPAGPQGApGPA<br>GEEGK | 1057.4783    | -3.44 | 22.98 |              |       |       |              |       |          |              |          |       |
|                                       | GQTGEpGIAGFk                                       | N/D          | N/D   | N/D   | N/D          | N/D   | N/D   | 597.2950     | -1.84 | 21.03    |              |          |       |
|                                       | GPpGPQGATGPLGPkGQT<br>GEpGIAGFk                    |              |       |       |              |       |       | 846.4249     | 1.89  | 38.11    |              | 841.0947 | -0.01 |
| GPpGPQGATGPLGPkGQT<br>GEpGIAGFkGEQGPK | 788.1433                                           |              |       |       |              |       |       | 0.25         | 31.98 | 784.1453 | -0.61        | 32.02    |       |

| Glycosylation Site | Sequence                                          | Glc-Gal-HyK  |       |       | Gal-HyK      |       |       | HyK          |       |       | Unmodified K |       |       |
|--------------------|---------------------------------------------------|--------------|-------|-------|--------------|-------|-------|--------------|-------|-------|--------------|-------|-------|
|                    |                                                   | Observed m/z | ppm   | RT    |
|                    | GPpGPQGATGPLGP(kG)G<br>QTGEpGIAGFk                |              |       |       |              |       |       | 895.1096     | 3.01  | 37.69 | 900.4467     | -2.89 | 37.85 |
|                    | GPpGPQGATGPLGP(kG)G<br>QTGEpGIAGFkGEQGPk          |              |       |       | 869.1708     | -0.96 | 29.95 | 828.6561     | 0.80  | 30.62 | 824.6583     | -0.42 | 31.00 |
|                    | GPpGPQGATGPLGP(kGG)<br>GQTGEpGIAGFk               |              |       |       | N/D          |       |       | 949.1299     | 0.17  | 36.51 | 954.4603     | 1.47  | 36.93 |
|                    | GPpGPQGATGPLGP(kGG)<br>GQTGEpGIAGFkGEQGPk         | 950.1958     | 0.60  | 28.43 | 909.6833     | -0.14 | 29.18 | 869.1708     | -0.96 | 29.95 | 865.1710     | 0.27  | 30.33 |
|                    | GPpGPQGATGPLGP(kGG)<br>GQTGEpGIAGFkGEQGPk         | 946.2000     | -2.49 | 28.85 | N/D          |       |       | N/D          |       |       | N/D          |       |       |
| K470               | GEQGPkGEpGPAGPQGAp<br>GPAGEEGK                    | 910.0754     | -1.14 | 15.97 | 856.0572     | -0.51 | 16.15 | 802.0389     | 0.31  | 16.43 | N/D          |       |       |
|                    | GEQGPkGEpGPAGPQGAp<br>GPAGEEGKR                   | 721.8353     | -3.18 | 14.84 | 681.3220     | -3.22 | 15.07 | 640.8088     | -3.44 | 14.72 |              |       |       |
|                    | GPpGPQGATGPLGPkGQT<br>GEpGIAGFKGEQGPk             |              |       |       |              |       |       | 784.1453     | -0.61 | 32.02 |              |       |       |
|                    | GPpGPQGATGPLGPkGQT<br>GEpGIAGFKGEQGPk             |              |       |       |              |       |       | 788.1433     | 0.25  | 31.98 |              |       |       |
|                    | GPpGPQGATGPLGPkGQT<br>GEpGIAGFKGEQGPk             |              |       |       |              |       |       | 824.6583     | -0.42 | 31.00 |              |       |       |
|                    | GPpGPQGATGPLGPkGQT<br>GEpGIAGFKGEQGPk             |              |       |       |              |       |       | 828.6561     | 0.80  | 30.62 |              |       |       |
|                    | GPpGPQGATGPLGP(kG)G<br>QTGEpGIAGF(kG)GEQGP<br>k   |              |       | N/D   |              |       | N/D   | 869.1708     | -0.96 | 29.95 |              |       |       |
|                    | GPpGPQGATGPLGP(kGG)<br>GQTGEpGIAGFKGEQGPk         |              |       |       |              |       |       | 865.1710     | 0.27  | 30.33 |              |       |       |
|                    | GPpGPQGATGPLGP(kGG)<br>GQTGEpGIAGFKGEQGPk         |              |       |       |              |       |       | 869.1708     | -0.96 | 29.95 |              |       |       |
|                    | GPpGPQGATGPLGP(kGG)<br>GQTGEpGIAGF(kG)GEQGP<br>Pk |              |       |       |              |       |       | 909.6833     | -0.14 | 29.18 |              |       |       |



| Glycosylation Site | Sequence                                    | Glc-Gal-HyK  |       |       | Gal-HyK      |       |       | HyK          |       |       | Unmodified K |          |       |       |  |  |
|--------------------|---------------------------------------------|--------------|-------|-------|--------------|-------|-------|--------------|-------|-------|--------------|----------|-------|-------|--|--|
|                    |                                             | Observed m/z | ppm   | RT    | Observed m/z | ppm   | RT    | Observed m/z | ppm   | RT    | Observed m/z | ppm      | RT    |       |  |  |
|                    | GPpGPQGATGPLGP(kGG)GQTGEpGIAGF(kGG)GEQGPk   |              |       |       |              |       |       | 950.1942     | 2.29  | 28.43 | 946.2000     | -2.49    | 28.85 |       |  |  |
|                    | GQTGEpGIAGFkGEQGPk                          |              |       |       |              |       |       | 602.6273     | 0.36  | 18.26 | 597.2953     | 0.97     | 18.76 |       |  |  |
|                    | GQTGEpGIAGF(kG)GEQGPk                       |              |       |       |              |       |       | 656.6449     | 0.29  | 17.67 | 651.3142     | -1.41    | 18.01 |       |  |  |
|                    | GQTGEpGIAGF(kGG)GEQGPk                      |              |       |       |              |       |       | 710.6617     | 1.44  | 17.00 | 705.3309     | 0.27     | 17.41 |       |  |  |
|                    | GQTGEpGIAGF(kG)GEQGPkGEpGPAGPQGAPpGPAGEEGK  |              |       |       |              |       |       | 935.9318     | 3.48  | 37.10 | N/D          |          |       |       |  |  |
|                    | GQTGEpGIAGF(kGG)GEQGPkGEpGPAGPQGAPpGPAGEEGK | 1057.4783    | -3.44 | 22.98 | 1016.9632    | -1.71 | 24.18 | 976.4493     | -1.06 | 24.77 |              |          |       |       |  |  |
| K527               | GFpGQDGLAGPkGAPGER                          | 689.6556     | 0.28  | 23.40 | 635.6378     | 0.62  | 24.40 | N/D          |       |       | N/D          |          |       |       |  |  |
|                    | GFpGQDGLAGPkGApGER                          | 1041.9760    | 1.18  | 20.42 | 960.9507     | 0.13  | 21.26 | 879.9239     | 0.58  | 21.75 |              |          |       |       |  |  |
|                    | GFpGQDGLAGPkGApGERGPSGLAGPK                 | 949.7926     | 0.98  | 29.40 | 895.7766     | -0.05 | 29.99 | 841.7577     | 0.73  | 30.41 |              |          |       |       |  |  |
|                    | GFpGQDGLAGPk                                |              |       |       |              |       |       | 588.2888     | -0.25 | 24.94 |              | 580.2916 | -0.70 | 25.62 |  |  |
|                    | GApGNRGFpGQDGLAGPk                          | N/D          |       |       | N/D          |       |       | N/D          |       |       |              | 576.6209 | -0.38 | 18.85 |  |  |
|                    | GApGDRGFpGQDGLAGPk                          | N/D          |       |       | N/D          |       |       | N/D          |       |       |              | 576.9482 | 0.84  | 22.20 |  |  |
| K542               | GApGERGPSGLAGPkGANGDpGRpGEpGLpGAR           | 857.4053     | 0.99  | 15.33 | N/D          |       |       | N/D          |       |       | N/D          |          |       |       |  |  |
|                    | GApGERGPSGLAGPkGADGDpGRpGEpGLpGAR           | 857.6525     | -0.41 | 16.58 | 813.1399     | 0.39  | 18.85 |              |       |       |              |          |       |       |  |  |
|                    | GPSLAGPkGADGDpGRpGEpGLpGAR                  | 938.1123     | 0.89  | 21.12 | 884.0952     | 0.38  | 21.53 |              |       |       |              |          |       |       |  |  |
|                    | GPSLAGPkGANGDpGRpGEpGLpGAR                  | 943.1150     | 1.88  | 17.24 | 889.0993     | -0.15 | 17.76 |              |       |       |              | 835.0817 | -0.17 | 17.93 |  |  |
|                    | GPSLAGPkGADGDpGRpGEpGLpGAR                  | 943.4453     | -0.56 | 18.76 | 889.4262     | 1.09  | 19.53 |              |       |       |              | 835.4095 | 0.07  | 20.13 |  |  |

| Glycosylation Site | Sequence                                                                    | Glc-Gal-HyK  |       |       | Gal-HyK      |       |       | HyK          |       |       | Unmodified K |       |       |
|--------------------|-----------------------------------------------------------------------------|--------------|-------|-------|--------------|-------|-------|--------------|-------|-------|--------------|-------|-------|
|                    |                                                                             | Observed m/z | ppm   | RT    |
|                    | GPSGLAGP <b>k</b> GANGD <b>p</b> GR <b>p</b><br>GE <b>p</b> GL <b>p</b> GAR | 948.4490     | -0.63 | 15.58 | 894.4300     | 0.90  | 15.84 | 840.4134     | -0.25 | 16.17 |              |       |       |
|                    | GPSGLAGP <b>k</b> GADGD <b>p</b> GR <b>p</b><br>GE <b>p</b> GL <b>p</b> GAR | 948.7755     | 0.96  | 16.92 | 894.7593     | -0.55 | 17.24 | 840.7413     | -0.12 | 17.59 |              |       |       |
|                    | GF <b>p</b> GGQDGLAGP <b>k</b> GAPGER<br>GPSGLAGP <b>k</b>                  |              |       |       |              |       |       |              |       |       | 841.7577     | 0.73  | 30.41 |
|                    | GF <b>p</b> GGQDGLAGP( <b>kG</b> )GAPGER<br>ERGPSGLAGP <b>k</b>             |              | N/D   |       |              | N/D   |       |              | N/D   |       | 895.7766     | -0.05 | 29.99 |
|                    | GF <b>p</b> GGQDGLAGP( <b>kGG</b> )GAPGER<br>GERGPSGLAGP <b>k</b>           |              |       |       |              |       |       |              |       |       | 949.7926     | 0.98  | 29.40 |
| K608               | GQ <b>p</b> GVMGF <b>p</b> GP <b>k</b> GADGEPGK                             |              | N/D   |       | 698.3197     | 2.96  | 26.90 |              | N/D   |       |              |       |       |
|                    | GQ <b>p</b> GVMGF <b>p</b> GP <b>k</b> GANGEPGK                             | 757.3408     | 2.91  | 18.41 | 703.3246     | 1.14  | 18.92 | 649.3071     | 1.07  | 19.53 |              |       |       |
|                    | GQ <b>p</b> GVMGF <b>p</b> GP <b>k</b> GAI <b>D</b> GEPGK                   | 757.6685     | 3.31  | 21.21 | 703.6533     | 0.15  | 22.20 | 649.6359     | -0.16 | 23.48 |              |       |       |
|                    | GQ <b>p</b> GVMGF <b>p</b> GP <b>k</b> GADGEPGK                             | 757.6715     | -0.65 | 22.79 | 703.6532     | 0.29  | 23.74 | 649.6353     | 0.76  | 24.68 |              | N/D   |       |
|                    | GQ <b>p</b> GVMGF <b>p</b> GP <b>k</b> GADGEPGK                             | 762.9992     | 4.52  | 16.13 | 708.6550     | 3.30  | 15.72 |              | N/D   |       |              |       |       |
|                    | GQ <b>p</b> GVMGF <b>p</b> GP <b>k</b> GADGEPGKAGEK                         | 886.0673     | 2.75  | 17.08 | 832.0504     | 2.09  | 17.71 | 778.0345     | 0.04  | 17.97 |              |       |       |
|                    | GQ <b>p</b> GVMGF <b>p</b> GP <b>k</b> GADGEPGKAGE <b>k</b>                 | 891.3981     | 3.68  | 16.91 | 837.3870     | -3.85 | 17.35 | 783.3637     | 3.15  | 17.89 |              |       |       |
|                    | GQ <b>p</b> GVMGF <b>p</b> GP <b>k</b>                                      |              | N/D   |       |              | N/D   |       | 610.2926     | 0.43  | 28.51 | 602.30       | 2.01  | 29.02 |
| K620               | AGE <b>k</b> GLPGAPGLR                                                      | 521.6028     | -1.05 | 18.40 | 467.5838     | 1.82  | 19.25 | 413.5665     | 0.38  | 19.33 |              |       |       |
|                    | AGE <b>k</b> GLPGAPGLR                                                      | 526.9332     | 1.31  | 16.23 | 472.9162     | 0.19  | 16.55 | 418.9005     | -4.35 | 16.64 |              |       |       |
|                    | AGE <b>k</b> GL <b>p</b> GAPGLR                                             | 532.2652     | 0.62  | 15.05 | 478.2478     | 0.26  | 15.30 | 424.2300     | 0.75  | 15.47 |              |       |       |
|                    | GADGEPGKAGE <b>k</b> GLPGAPGLR                                              | 764.0415     | -1.72 | 17.50 |              | N/D   |       |              | N/D   |       |              | N/D   |       |
|                    | GANGEPGKAGE <b>k</b> GL <b>p</b> GAPGLR                                     | 769.0427     | 1.48  | 14.83 | 715.0268     | -0.81 | 15.00 | 661.0110     | -3.60 | 15.25 |              |       |       |

| Glycosylation Site | Sequence                             | Glc-Gal-HyK  |       |       | Gal-HyK      |       |       | HyK          |       |       | Unmodified K |       |       |
|--------------------|--------------------------------------|--------------|-------|-------|--------------|-------|-------|--------------|-------|-------|--------------|-------|-------|
|                    |                                      | Observed m/z | ppm   | RT    |
|                    | GADGEpGKAGEkGLpGAPGLR                | 769.3725     | -0.86 | 15.50 | 715.3540     | 0.31  | 15.84 | 661.3371     | -0.72 | 16.26 |              |       |       |
|                    | GADGEpGKAGEkGLpGAPGLR                | 774.7035     | -0.03 | 14.83 | 720.6838     | 2.86  | 14.92 | 666.6688     | -0.81 | 15.08 |              |       |       |
|                    | GQpGVMGFpGpKADGEpGKAGEk              |              |       |       |              |       |       | 783.3637     | 3.15  | 17.89 | 778.0345     | 0.04  | 17.97 |
|                    | GQpGVMGFpGP(kG)ADGEpGKAGEk           |              | N/D   |       |              | N/D   |       | 837.3870     | -3.85 | 17.35 | 832.0504     | 2.09  | 17.71 |
|                    | GQpGVMGFpGP(kGG)ADGEpGKAGEk          |              |       |       |              |       |       | 891.3981     | 3.68  | 16.91 | 886.0673     | 2.75  | 17.08 |
|                    |                                      |              |       |       |              |       |       |              |       |       |              |       |       |
| K731               | GLpGTPGTDGpKGAAGPAGPpGAQGPpGLQGMpGER | 1203.5580    | 2.30  | 41.56 | 1149.5472    | -3.50 | 42.16 | 1095.5287    | -2.86 | 42.67 |              |       |       |
|                    | GLpGTPGTDGpKGAAGPAGPpGAQGPpGLQGMpGER | 1208.8917    | 0.59  | 39.33 | 1154.8745    | 0.27  | 40.44 | 1100.8575    | -0.27 | 40.96 |              | N/D   |       |
|                    | GLpGTPGTDGpKGAAGPAGPpGAQGPpGLQGMpGER | 1214.2234    | 0.54  | 36.51 | 1160.2040    | 2.11  | 37.19 | 1106.1854    | 3.10  | 37.69 |              |       |       |
|                    | GLpGTPGTDGpK                         |              | N/D   |       |              | N/D   |       | 572.7765     | 2.90  | 15.00 | 564.7807     | 0.01  | 15.00 |
| K764               | GAAGIAGPkGDRGDVGEK                   | 499.4916     | 4.40  | 19.15 | 458.9789     | 3.69  | 19.38 | 418.4658     | 3.79  | 19.57 | 414.4683     | 0.87  | 19.82 |
|                    | GAAGIAGPkGDR                         |              | N/D   |       |              | N/D   |       | 543.2901     | -2.13 | 17.76 |              | N/D   |       |
| K773               | GDRGDVGEkGPEGAPGK                    |              |       |       |              |       |       |              |       |       | 542.5997     | 2.95  | 16.76 |
|                    | GDRGDVGEkGPEGApGK                    |              |       |       |              |       |       |              |       |       | 547.9323     | 1.17  | 15.56 |
|                    | GDVGEkGPEGAPGK                       |              |       |       |              |       |       |              |       |       | 433.2192     | -2.53 | 16.96 |
|                    | GDVGEkGPEGApGK                       |              |       |       |              |       |       |              |       |       | 438.5509     | -2.64 | 16.55 |
|                    | GDVGEkGPEGAPGKDGGRR                  |              | N/D   |       |              | N/D   |       |              |       |       | 561.6068     | 2.97  | 16.60 |
|                    | GDVGEkGPEGApGKDGGRR                  |              |       |       |              |       |       |              |       |       | 566.9395     | 1.07  | 15.98 |
|                    | GAAGIAGPKGDRGDVGEk                   |              |       |       |              |       |       |              |       |       | 414.4683     | 0.87  | 19.82 |
|                    | GAAGIAGPkGDRGDVGEk                   |              |       |       |              |       |       |              |       |       | 418.4658     | 3.79  | 19.57 |

| Glycosylation Site                                                                 | Sequence                                                                                | Glc-Gal-HyK                                                               |           |       | Gal-HyK      |           |       | HyK          |           |       | Unmodified K |          |       |       |
|------------------------------------------------------------------------------------|-----------------------------------------------------------------------------------------|---------------------------------------------------------------------------|-----------|-------|--------------|-----------|-------|--------------|-----------|-------|--------------|----------|-------|-------|
|                                                                                    |                                                                                         | Observed m/z                                                              | ppm       | RT    | Observed m/z | ppm       | RT    | Observed m/z | ppm       | RT    | Observed m/z | ppm      | RT    |       |
|                                                                                    | GAAGIAGP( <b>kG</b> )GDRGDV <b>E</b> <b>k</b>                                           |                                                                           |           |       |              |           |       |              |           |       | 458.9789     | 3.69     | 19.38 |       |
|                                                                                    | GAAGIAGP( <b>kGG</b> )GDRGDV <b>G</b> <b>E</b> <b>k</b>                                 |                                                                           |           |       |              |           |       |              |           |       | 499.4916     | 4.40     | 19.15 |       |
| K803                                                                               | GLTGPIGPPGPAGANG <b>E</b> <b>k</b> <b>G</b><br>EVGP <b>p</b> GPAGTAGAR                  |                                                                           |           |       |              |           |       | 966.1584     | -1.40     | 36.42 | N/D          |          |       |       |
|                                                                                    | GLTGPIGPPGPAGAI <b>D</b> <b>G</b> <b>E</b> <b>k</b><br>GEVGP <b>p</b> GPAGTAGAR         | N/D                                                                       |           |       | N/D          |           |       | 966.4859     | -0.88     | 38.86 |              |          |       |       |
|                                                                                    | GLTGPIGPPGPAGAD <b>G</b> <b>E</b> <b>k</b> <b>G</b><br>EVGP <b>p</b> GPAGTAGAR          |                                                                           |           |       |              |           |       | 966.4858     | -0.78     | 40.74 |              |          |       |       |
|                                                                                    | GLTGPIG <b>p</b> GPAGANG <b>E</b> <b>k</b> <b>G</b><br>EVGP <b>p</b> GPAGTAGAR          | 1079.5249                                                                 | -1.06     | 34.71 | 1025.5063    | -0.14     | 35.48 | 971.4889     | -0.22     | 36.08 |              |          |       |       |
|                                                                                    | GLTGPIG <b>p</b> GPAGAI <b>D</b> <b>G</b> <b>E</b> <b>k</b><br>GEVGP <b>p</b> GPAGTAGAR | 1079.8521                                                                 | -0.18     | 36.85 | 1025.8345    | -0.20     | 37.52 | 971.8164     | 0.30      | 38.28 |              |          |       |       |
|                                                                                    | GLTGPIG <b>p</b> GPAGAD <b>G</b> <b>E</b> <b>k</b> <b>G</b><br>EVGP <b>p</b> GPAGTAGAR  | 1079.8518                                                                 | 0.09      | 38.36 |              |           |       | 971.8162     | 0.50      | 39.97 |              |          |       |       |
|                                                                                    | GLTGPIG <b>p</b> GPAGAI <b>D</b> <b>G</b> <b>E</b> <b>k</b><br>GEVGP <b>p</b> GPAGTAGAR | 1085.1860                                                                 | -2.27     | 34.03 |              |           |       |              |           |       |              |          |       |       |
|                                                                                    | GLTGPIG <b>p</b> GPAGAD <b>G</b> <b>E</b> <b>k</b> <b>G</b><br>EVGP <b>p</b> GPAGTAGAR  | 1085.1848                                                                 | -1.16     | 35.39 | 1031.1624    | 3.42      | 36.25 |              |           |       |              |          |       |       |
|                                                                                    | GLTGPIG <b>p</b> GPAGANG <b>E</b> <b>k</b>                                              |                                                                           |           |       |              |           |       | 811.4140     | -1.04     | 27.41 |              | 803.4161 | -0.50 | 27.67 |
|                                                                                    | GLTGPIG <b>p</b> GPAGAI <b>D</b> <b>G</b> <b>E</b> <b>k</b>                             | N/D                                                                       |           |       |              |           |       | 811.9060     | -1.03     | 30.11 |              | 803.9083 | -0.74 | 31.98 |
|                                                                                    | GLTGPIG <b>p</b> GPAGAD <b>G</b> <b>E</b> <b>k</b>                                      |                                                                           |           |       |              |           |       | 811.9064     | -1.53     | 31.47 |              |          |       |       |
|                                                                                    | K848                                                                                    | GETGP <b>p</b> GPAGFAG <b>p</b> GPAD<br>GQPGAI <b>k</b> GEQGEAGQ <b>k</b> | 1116.1705 | -3.61 | 31.22        | 1062.1523 | -3.24 | 32.23        | 1008.1351 | -3.82 |              | 33.03    | N/D   |       |
| GETGP <b>p</b> GPAGFAG <b>p</b> GPAD<br>GQ <b>p</b> GAI <b>k</b> GEQGEAGQ <b>k</b> |                                                                                         | 1121.5005                                                                 | -2.14     | 29.42 | 1067.4832    | -2.53     | 30.01 | 1013.4656    | -2.68     | 30.32 |              |          |       |       |
| GETGP <b>p</b> GPAGFAG <b>p</b> GPAD<br>GQPGAI <b>k</b> GEQGEAGQ <b>k</b>          |                                                                                         | 1121.5024                                                                 | -3.83     | 31.03 | 1067.4834    | -2.72     | 31.22 | 1013.4659    | -2.97     | 32.63 |              |          |       |       |
| GETGP <b>p</b> GPAGFAG <b>p</b> GPAD<br>GQ <b>p</b> GAI <b>k</b> GEQGEAGQ <b>k</b> |                                                                                         | 1126.8326                                                                 | -2.54     | 29.01 | 1072.8142    | -1.92     | 29.60 | 1018.7975    | -2.92     | 30.01 |              |          |       |       |
| GAPGERGETGP <b>p</b> GPAGFA<br>GP <b>p</b> GADGQPGAI <b>k</b>                      |                                                                                         | N/D                                                                       |           |       |              |           |       | 907.7529     | 2.78      | 25.02 | 902.4232     | 0.65     |       | 25.37 |

| Glycosylation Site | Sequence                                     | Glc-Gal-HyK                          |       |       | Gal-HyK      |       |       | HyK          |           |       | Unmodified K |           |       |       |
|--------------------|----------------------------------------------|--------------------------------------|-------|-------|--------------|-------|-------|--------------|-----------|-------|--------------|-----------|-------|-------|
|                    |                                              | Observed m/z                         | ppm   | RT    | Observed m/z | ppm   | RT    | Observed m/z | ppm       | RT    | Observed m/z | ppm       | RT    |       |
|                    | GApGERGETGPpGPAGFAGPpGADGQpGAK               |                                      |       |       |              |       |       | 913.0870     | 0.07      | 22.62 | 907.7544     | 1.13      | 22.87 |       |
|                    | GETGPpGPAGFAGPpGADGQpGAK                     |                                      |       |       |              |       |       | 713.3334     | -3.39     | 38.50 | 707.9988     | 1.62      | 38.23 |       |
|                    | GETGPpGPAGFAGPpGADGQpGAK                     |                                      |       |       |              |       |       | 718.6655     | -3.17     | 35.16 | 713.3340     | -2.55     | 35.57 |       |
| K857               | GEQGEAGQkGDAGApGPQGPSGApGPQGPTGVTGPK         | 1190.2136                            | -2.39 | 26.08 | 1136.1960    | -2.50 | 26.69 | 1082.1779    | -2.17     | 27.10 | N/D          |           |       |       |
|                    | GEQGEAGQkGDAGApGPQGPSGApGPQGPTGVTGPK         | 1195.5427                            | -0.25 | 25.04 | 1141.5268    | -1.75 | 25.46 | 1087.5093    | -1.94     | 26.08 |              |           |       |       |
|                    | GEQGEAGQkGDAGApGPQGPSGApGPQGPTGVTGPK(kGG)GAR | 1048.9772                            | -2.01 | 19.71 | 1008.4650    | -3.08 | 19.91 | N/D          |           |       |              |           |       |       |
|                    |                                              | GETGPpGPAGFAGPpGADGQpGAKGEQGEAGQk    |       |       |              |       |       |              | 1013.4659 | -2.97 | 32.63        | 1008.1351 | -3.82 | 33.03 |
|                    |                                              | GETGPpGPAGFAGPpGADGQpGAKGEQGEAGQk    |       |       |              |       |       |              | 1018.7975 | -2.92 | 30.01        | 1013.4656 | -2.68 | 30.32 |
|                    |                                              | GETGPpGPAGFAGPpGADGQPGA(kG)GEQGEAGQk |       |       |              |       |       |              | 1067.4834 | -2.72 | 31.22        | 1062.1523 | -3.24 | 32.23 |
|                    |                                              | GETGPpGPAGFAGPpGADGQpGA(kG)GEQGEAGQk |       | N/D   |              |       | N/D   |              | 1072.8142 | -1.92 | 29.60        | 1067.4832 | -2.53 | 30.01 |
|                    | GETGPpGPAGFAGPpGADGQPGA(kGG)GEQGEAGQk        |                                      |       |       |              |       |       | 1121.5024    | -3.83     | 31.03 | 1116.1705    | -3.61     | 31.22 |       |
|                    | GETGPpGPAGFAGPpGADGQpGA(kGG)GEQGEAGQk        |                                      |       |       |              |       |       | 1126.8326    | -2.54     | 29.01 | 1121.5005    | -2.14     | 29.42 |       |
| K884               | GEQGEAGQkGDAGApGPQGPSGApGPQGPTGVTGPKGAR      | 963.9534                             | -3.57 | 16.39 | 923.4373     | -0.59 | 16.72 | N/D          |           |       | N/D          |           |       |       |

| Glycosylation Site | Sequence                                                                 | Glc-Gal-HyK  |       |       | Gal-HyK      |       |       | HyK          |       |       | Unmodified K |      |       |          |           |       |       |  |  |
|--------------------|--------------------------------------------------------------------------|--------------|-------|-------|--------------|-------|-------|--------------|-------|-------|--------------|------|-------|----------|-----------|-------|-------|--|--|
|                    |                                                                          | Observed m/z | ppm   | RT    | Observed m/z | ppm   | RT    | Observed m/z | ppm   | RT    | Observed m/z | ppm  | RT    |          |           |       |       |  |  |
|                    | GEQGEAGQ <b>k</b> GDAGApGP<br>QGPSGApGPPQGPTGVTGP<br><b>k</b> GAR        | 967.9489     | -0.22 | 16.14 | 927.4380     | -2.72 | 16.47 |              |       |       |              |      |       |          |           |       |       |  |  |
|                    | GEQGEAGQ( <b>kGG</b> )GDAGAp<br>pGPPQGPSGApGPPQGPTGV<br>TGP <b>k</b> GAR | 1048.9772    | -2.01 | 19.71 | N/D          |       |       |              |       |       |              |      |       |          |           |       |       |  |  |
|                    | GEQGEAGQ( <b>kG</b> )GDAGAp<br>GPQGPSGApGPPQGPTGVT<br>GP <b>k</b> GAR    | 1008.4650    | -3.08 | 19.91 |              |       |       |              |       |       |              |      |       |          |           |       |       |  |  |
|                    | GDAGApGPPQGPSGApGP<br>QGPTGVTGP <b>k</b> GAR                             | 990.1309     | 0.10  | 18.23 | 936.1132     | 0.21  | 18.66 | 787.3779     | -2.56 | 30.84 |              |      |       |          |           |       |       |  |  |
|                    | GEQGEAGQ <b>k</b> GDAGApGP<br>QGPSGApGPPQGPTGVTGP<br><b>k</b>            | N/D          |       |       | N/D          |       |       | 1087.5093    | -1.94 | 26.08 |              |      |       |          | 1082.1779 | -2.17 | 27.10 |  |  |
|                    | GEQGEAGQ( <b>kG</b> )GDAGAp<br>GPQGPSGApGPPQGPTGVT<br>GP <b>k</b>        |              |       |       |              |       |       | 1141.5268    | -1.75 | 25.46 |              |      |       |          | 1136.1960 | -2.50 | 26.69 |  |  |
|                    | GEQGEAGQ( <b>kGG</b> )GDAGAp<br>pGPPQGPSGApGPPQGPTGV<br>TGP <b>k</b>     |              |       |       |              |       |       | 1195.5427    | -0.25 | 25.04 |              |      |       |          | 1190.2136 | -2.39 | 26.08 |  |  |
| K929               | VGPpGSDGNpGppGPPGP<br>SGKDGP <b>k</b> GAR                                | 970.7800     | -0.06 | 21.82 | 916.7634     | -1.15 | 22.10 | 857.4141     | -1.17 | 22.66 | N/D          |      |       |          |           |       |       |  |  |
|                    | VGPpGSI <b>D</b> GNpGppGPPG<br>PSGKDGP <b>k</b>                          | N/D          |       |       | 911.0986     | 4.51  | 21.71 | 768.0280     | -4.12 | 25.02 |              |      |       |          |           |       |       |  |  |
|                    | VGPpGSDGNpGppGPPGP<br>SGKDGP <b>k</b>                                    |              |       |       | 911.4334     | -2.95 | 21.71 |              |       |       |              |      |       |          |           |       |       |  |  |
| K956               | AGDpGLQGPAGPPGE <b>k</b> GE<br>PGDDGSPGDGPpGPQGL<br>AGQR                 | N/D          |       |       | 964.1921     | -1.39 | 40.91 | 923.6767     | 0.53  | 40.10 | 919.6786     | 0.24 | 41.25 |          |           |       |       |  |  |
|                    | AGDpGLQGPAGPpGE <b>k</b> GE<br>PGDDGSPGDGPpGPQGL<br>AGQR                 |              |       |       | 1008.7021    | 0.34  | 38.66 | 968.1893     | -0.06 | 39.08 | 927.6749     | 1.23 | 39.76 | 923.6775 | 0.05      | 39.17 |       |  |  |

| Glycosylation Site | Sequence                                                                                            | Glc-Gal-HyK  |       |       | Gal-HyK      |       |       | HyK          |       |       | Unmodified K |       |       |
|--------------------|-----------------------------------------------------------------------------------------------------|--------------|-------|-------|--------------|-------|-------|--------------|-------|-------|--------------|-------|-------|
|                    |                                                                                                     | Observed m/z | ppm   | RT    |
|                    | AGD <b>p</b> GLQGPAG <b>p</b> GE <b>k</b> GE<br><b>p</b> GDDG <b>p</b> SGPDG <b>p</b> GPQGL<br>AGQR | 1012.7044    | -3.07 | 36.55 | 972.1844     | 3.80  | 36.89 | 931.6742     | 0.75  | 37.32 | 927.6756     | 0.47  | 37.65 |
|                    | AGD <b>p</b> GLQGPAG <b>p</b> GE <b>k</b> GE<br><b>p</b> GDDG <b>p</b> SGPDG <b>p</b> GPQGL<br>AGQR | N/D          |       |       | 976.1900     | -3.14 | 34.37 | N/D          |       |       | N/D          |       |       |
|                    | AGD <b>p</b> GLQGPAG <b>p</b> GE <b>k</b>                                                           | N/D          |       |       | N/D          |       |       | 740.3579     | -0.06 | 16.34 | 732.3578     | 3.54  | 17.84 |
|                    | AGD <b>p</b> GLQGPAG <b>p</b> GE <b>k</b>                                                           | N/D          |       |       | N/D          |       |       | 748.3542     | 1.48  | 16.26 | N/D          |       |       |
| K1055              | EGS <b>p</b> GADG <b>p</b> GRDGAAGV<br><b>k</b> GDR                                                 | 599.5180     | 0.14  | 17.00 | 559.0040     | 1.58  | 17.27 | 518.4912     | 0.94  | 17.54 | 514.4920     | 1.61  | 17.82 |
|                    | DGAAGV <b>k</b> GDRGETGAVGA<br>PGAPG <b>p</b> GS <b>p</b> GPAGPIGK                                  | N/D          |       |       | N/D          |       |       | 782.6407     | 0.57  | 25.02 | N/D          |       |       |
|                    | DGAAGV <b>k</b> GDRGETGAVGA<br><b>p</b> GAPG <b>p</b> GS <b>p</b> GPAGPIGK                          | N/D          |       |       | 827.1528     | 0.34  | 24.18 | 786.6400     | -0.16 | 24.60 | N/D          |       |       |
|                    | DGAAGV <b>k</b> GDRGETGAVGA<br><b>p</b> GAPG <b>p</b> GS <b>p</b> GPAGPIGK                          | 871.6643     | 0.77  | 21.01 | 831.1508     | 1.17  | 21.67 | 790.6381     | 0.59  | 22.25 | 786.6398     | -0.11 | 22.76 |
|                    | EGS <b>p</b> GADG <b>p</b> GRDGAAGV<br><b>k</b>                                                     | N/D          |       |       | N/D          |       |       | N/D          |       |       | 432.4545     | 2.87  | 17.82 |
| K1118              | GM <b>p</b> GPQGPRGD <b>k</b> GETGE<br>AGER                                                         | 610.5205     | -0.69 | 19.29 | 570.0060     | 1.54  | 19.40 | 529.4940     | -0.60 | 19.59 | N/D          |       |       |
|                    | GD <b>k</b> GETGEAGER                                                                               | N/D          |       |       | N/D          |       |       | 407.8509     | -2.11 | 15.59 | N/D          |       |       |

\*All modified amino acid residues are written as lowercase. Glycosylation sites are in bold red while hydroxyproline, hydroxylysine, and oxidized methionine are in bold black. Bold G is Gal moiety while bold GG is Glc-Gal moiety attached to hydroxy lysine residue.

\*\* Every modified peptide sequences were supported by MS/MS.
