# Supplementary material
Source: PubMed Central journal article supplement (PMC4866811)
Supplement: NIHMS509233-supplement-3_si_001.pdf [file NIHMS509233-supplement-3_si_001.pdf]

LC-MS/MS Identification of the O-Glycosylation  
and Hydroxylation of Amino Acid Residues  
of Collagen  $\alpha$ -1 (II) chain from  
Bovine Cartilage

*Ehwang Song, and Yehia Mechref\**

Department of Chemistry and Biochemistry, Texas Tech University,  
Lubbock, TX

\*Corresponding author

Email: [yehia.mechref@ttu.edu](mailto:yehia.mechref@ttu.edu)

Tel: 806-742-3059

Fax: 806-742-1289

**Keywords:** type II collagen, CO2A1, hydroxylation,  
glycosylation, glycopeptides, LC-MS/MS, quantitation

|        |                                                                                                                                                                                                                                                      |     |
|--------|------------------------------------------------------------------------------------------------------------------------------------------------------------------------------------------------------------------------------------------------------|-----|
| Bovine | QMAGGFDEK AGGAQMGVMQ GPMGPMGPRG PPG <sup>P</sup> PAGA <sup>P</sup> PGP QGFOGN <sup>P</sup> PGEP <sup>P</sup> GEP <sup>P</sup> PGVSGPMG                                                                                                               | 240 |
| Human  | QMAGGFDEK AGGAQLGVMQ GPMGPMGPRG PPGPAGAPGP QGFOGNPGEP GEPGVSGPMG                                                                                                                                                                                     |     |
| Bovine | PRG <sup>PP</sup> PPG <sup>PP</sup> PGK <sup>P</sup> PGDDGEAGK <sup>P</sup> PK <sup>P</sup> GKSGERG <sup>P</sup> PPG <sup>P</sup> PQGARGF <sup>P</sup> PGT <sup>P</sup> PGL <sup>P</sup> PGV <sup>K</sup> KGHR <sup>K</sup> GYPGLDGAK <sup>K</sup> G | 300 |
| Human  | PRGPPGPPGK PGDDGEAGKP GKAGERGPPG PQGARGFPGT PGLPGVKGHR GYPGLDGAKG                                                                                                                                                                                    |     |
| Bovine | EAGAPGV <sup>K</sup> KGE <sup>K</sup> SGS <sup>P</sup> PGEDGS <sup>P</sup> PK <sup>N</sup> GPMGPRGL <sup>P</sup> PG <sup>P</sup> ERGRTGPAGA AGARG <sup>N</sup> DDGQ <sup>P</sup> GPAGP <sup>P</sup> PG <sup>P</sup> PVG                              | 360 |
| Human  | EAGAPGVKGE SGSPGENGSP GPMGPRGLPG ERGRTGPAGA AGARGNDGQP GPAGPPGPVVG                                                                                                                                                                                   |     |
| Bovine | PAGG <sup>P</sup> PGF <sup>P</sup> PGA <sup>P</sup> PGAK <sup>K</sup> GEAGPT GARGPEGAQ <sup>K</sup> PRGE <sup>P</sup> PGT <sup>P</sup> PGS <sup>P</sup> PGPAGAAGNP <sup>K</sup> GTDGI <sup>K</sup> PGAK <sup>K</sup> G                               | 420 |
| Human  | PAGGPGFPGA PGAKGEAGPT GARGPEGAQ PRGEPGT PGS PGPAGASNP GTDGI PGAKG                                                                                                                                                                                    |     |
| Bovine | SAGAPGIAGA PGF <sup>PP</sup> PGPRG <sup>PP</sup> GPQGATGPLG PK <sup>K</sup> QOTGE <sup>P</sup> PGI <sup>P</sup> AGF <sup>K</sup> KGE <sup>K</sup> QGP <sup>K</sup> GEP <sup>K</sup> PGPAGPQG                                                         | 480 |
| Human  | SAGAPGIAGA PGFPGPRGPP GPQGATGPLG PKQOTGEPGI AGFKGEQGP GEPGPAGPQG                                                                                                                                                                                     |     |
| Bovine | APGPAGEEGK RGARGE <sup>P</sup> PGGA <sup>P</sup> GPAG <sup>P</sup> PPGERG <sup>N</sup> APGDRGF <sup>P</sup> PGQ <sup>K</sup> DGLAGP <sup>K</sup> KGAP <sup>P</sup> GERG <sup>P</sup> PSGLAG                                                          | 540 |
| Human  | APGPAGEEGK RGARGEPPGV GPIGPPGERG APGNRGFPGQ DGLAGPKGAP GERGPSGLAG                                                                                                                                                                                    |     |
| Bovine | PK <sup>K</sup> GADGD <sup>P</sup> PR <sup>N</sup> PGE <sup>P</sup> PGL <sup>P</sup> PGAR <sup>P</sup> GLTGR <sup>P</sup> PGDAG <sup>K</sup> PQKVGPSGA <sup>P</sup> PGEDGR <sup>P</sup> PG <sup>P</sup> PP <sup>P</sup> GPQGARGQ <sup>P</sup> PG     | 600 |
| Human  | PKGANGDPPR PGEPPGPPGAR GLTGRPPDAG PQKVGPSGA PGEDGRPPPG GPQGARGQPG                                                                                                                                                                                    |     |
| Bovine | VMGF <sup>K</sup> PG <sup>K</sup> PKGA <sup>K</sup> DGE <sup>N</sup> PGKAGE <sup>P</sup> K <sup>K</sup> GLPGAP <sup>P</sup> GLRG <sup>P</sup> LPGKDGETGA AGP <sup>P</sup> PG <sup>P</sup> PAG <sup>P</sup> PA GERGEQ <sup>P</sup> GAPG               | 660 |
| Human  | VMGFPPGPKGA NGEPPKAGEK GLPPGAPGLRG LPGKDGETGA AGPPGPAGPA GERGEQGAPG                                                                                                                                                                                  |     |
| Bovine | PSGFQGLPGP <sup>P</sup> PG <sup>P</sup> PPGEGGK <sup>P</sup> GDQGV <sup>P</sup> PGEAG <sup>P</sup> APGLVGPRGE <sup>P</sup> RGFP <sup>P</sup> GERGSP <sup>P</sup> GSQGLQ <sup>P</sup> GARG                                                            | 720 |
| Human  | PSGFQGLPPG PGPPEGGGKP GDQGVPPGEAG APGLVGPRGE RGFPGERGSP GAQGLQGPRG                                                                                                                                                                                   |     |

|        |                                                                                                                                                                                                                                                                                                                                                                                                        |      |
|--------|--------------------------------------------------------------------------------------------------------------------------------------------------------------------------------------------------------------------------------------------------------------------------------------------------------------------------------------------------------------------------------------------------------|------|
| Bovine | <u>LPGT</u> <sup>P</sup> <u>PGTDGP</u> <u>KGAAGPAG</u> <sup>P</sup> <u>PP</u> <u>GAQG</u> <sup>P</sup> <u>PPGLQG</u> <u>MPGERGAAGI</u> <u>AGP</u> <sup>P</sup> <u>KGDRGDV</u> <u>GEKGPEGA</u> <sup>P</sup> <u>PG</u>                                                                                                                                                                                   | 780  |
| Human  | <u>LPGT</u> <u>PGTDGP</u> <u>KGASGPAGPP</u> <u>GAQGPPGLQG</u> <u>MPGERGAAGI</u> <u>AGPKGDRGDV</u> <u>GEKGPEGA</u> <sup>P</sup> <u>PG</u>                                                                                                                                                                                                                                                               |      |
| Bovine | <u>KDGG</u> <u>RGLTGP</u> <u>IGP</u> <sup>P</sup> <u>PPAGAD</u> <u>GE</u> <sup>P</sup> <u>KGEVGP</u> <sup>P</sup> <u>PG</u> <u>PAGTAGARGA</u> <u>PPERGETG</u> <sup>P</sup> <u>PP</u> <u>GPAGFAG</u> <sup>P</sup> <u>PPG</u>                                                                                                                                                                            | 840  |
| Human  | <u>KDGG</u> <u>RGLTGP</u> <u>IGPPGPAGAN</u> <u>GE</u> <sup>K</sup> <u>KGEVGP</u> <sup>P</sup> <u>PG</u> <u>PAGSAGARGA</u> <u>PPERGETG</u> <sup>P</sup> <u>PP</u> <u>GPAGFAG</u> <sup>P</sup> <u>PPG</u>                                                                                                                                                                                                |      |
| Bovine | <u>ADGQ</u> <sup>P</sup> <u>PGA</u> <sup>P</sup> <u>KGE</u> <u>QGEAGQ</u> <sup>P</sup> <u>KGDA</u> <u>GAP</u> <sup>P</sup> <u>GPQG</u> <sup>P</sup> <u>PSG</u> <u>AP</u> <sup>P</sup> <u>GPQG</u> <sup>P</sup> <u>P</u> <u>TGV</u> <u>TGP</u> <sup>P</sup> <u>KGARGAQ</u> <u>GP</u> <sup>P</sup> <u>PGATGF</u> <sup>P</sup> <u>PPG</u>                                                                 | 900  |
| Human  | <u>ADGQ</u> <sup>P</sup> <u>PGA</u> <sup>P</sup> <u>KGE</u> <u>QGEAGQ</u> <sup>P</sup> <u>KGDA</u> <u>GAP</u> <sup>P</sup> <u>GPQG</u> <sup>P</sup> <u>PSG</u> <u>AP</u> <sup>P</sup> <u>GPQG</u> <sup>P</sup> <u>P</u> <u>TGV</u> <u>TGP</u> <sup>P</sup> <u>KGARGAQ</u> <u>GP</u> <sup>P</sup> <u>PGATGF</u> <sup>P</sup> <u>PPG</u>                                                                 |      |
| Bovine | <u>AAGR</u> <u>VGP</u> <sup>P</sup> <u>PPGS</u> <u>DGD</u> <sup>N</sup> <u>PP</u> <sup>N</sup> <u>PPGPP</u> <u>GPSG</u> <u>KDGP</u> <sup>P</sup> <u>KG</u> <u>ARGDSG</u> <sup>P</sup> <u>PPGR</u> <u>AGD</u> <sup>P</sup> <u>PG</u> <sup>P</sup> <u>LQ</u> <sup>P</sup> <u>GPA</u> <u>GP</u> <sup>P</sup> <u>PGE</u> <sup>P</sup> <u>KG</u> <sup>P</sup> <u>EP</u> <sup>P</sup> <u>PG</u>              | 960  |
| Human  | <u>AAGR</u> <u>VGP</u> <sup>P</sup> <u>PPGS</u> <u>NGN</u> <sup>P</sup> <u>PP</u> <sup>P</sup> <u>PPGPP</u> <u>GPSG</u> <u>KDGP</u> <sup>P</sup> <u>KG</u> <u>ARGDSG</u> <sup>P</sup> <u>PPGR</u> <u>AGE</u> <sup>P</sup> <u>PG</u> <sup>P</sup> <u>LQ</u> <sup>P</sup> <u>GPA</u> <u>GP</u> <sup>P</sup> <u>PGE</u> <sup>P</sup> <u>KG</u> <sup>P</sup> <u>EP</u> <sup>P</sup> <u>PG</u>              |      |
| Bovine | <u>DDG</u> <u>PSG</u> <u>PDGP</u> <u>PG</u> <sup>P</sup> <u>POGLAGQR</u> <u>GIVGL</u> <sup>P</sup> <u>PG</u> <sup>P</sup> <u>QRG</u> <u>ERGF</u> <sup>P</sup> <u>PGL</u> <sup>P</sup> <u>P</u> <u>G</u> <u>SGE</u> <sup>P</sup> <u>PG</u> <sup>P</sup> <u>KQ</u> <sup>P</sup> <u>GAP</u> <u>GASGDRG</u> <sup>P</sup> <u>PPG</u>                                                                        | 1020 |
| Human  | <u>DDG</u> <u>PSGA</u> <u>EGP</u> <u>PG</u> <sup>P</sup> <u>POGLAGQR</u> <u>GIVGL</u> <sup>P</sup> <u>PG</u> <sup>P</sup> <u>QRG</u> <u>ERGF</u> <sup>P</sup> <u>PGL</u> <sup>P</sup> <u>P</u> <u>G</u> <u>SGE</u> <sup>P</sup> <u>PG</u> <sup>P</sup> <u>KQ</u> <sup>P</sup> <u>GAP</u> <u>GASGDRG</u> <sup>P</sup> <u>PPG</u>                                                                        |      |
| Bovine | <u>PV</u> <u>GP</u> <sup>P</sup> <u>PGLTGP</u> <u>AGE</u> <sup>P</sup> <u>PG</u> <sup>P</sup> <u>REGSP</u> <u>GAD</u> <u>GP</u> <sup>P</sup> <u>PRDG</u> <u>AAGV</u> <sup>P</sup> <u>KG</u> <sup>P</sup> <u>DRGE</u> <u>TGAVGAP</u> <sup>P</sup> <u>GP</u> <sup>P</sup> <u>AP</u> <u>G</u> <sup>P</sup> <u>PP</u> <sup>P</sup> <u>GS</u> <sup>P</sup> <u>PP</u> <u>PAG</u>                             | 1080 |
| Human  | <u>PV</u> <u>GP</u> <sup>P</sup> <u>PGLTGP</u> <u>AGE</u> <sup>P</sup> <u>PG</u> <sup>P</sup> <u>REGSP</u> <u>GAD</u> <u>GP</u> <sup>P</sup> <u>PRDG</u> <u>AAGV</u> <sup>P</sup> <u>KG</u> <sup>P</sup> <u>DRGE</u> <u>TGAVGAP</u> <sup>P</sup> <u>GP</u> <sup>P</sup> <u>AP</u> <u>G</u> <sup>P</sup> <u>PP</u> <sup>P</sup> <u>GS</u> <sup>P</sup> <u>PP</u> <u>PAG</u>                             |      |
| Bovine | <u>PIG</u> <u>KQ</u> <u>DRGE</u> <u>AGA</u> <u>Q</u> <sup>P</sup> <u>PM</u> <sup>P</sup> <u>GPA</u> <u>GP</u> <sup>P</sup> <u>PAGARGMPG</u> <u>POG</u> <sup>P</sup> <u>PRGD</u> <sup>P</sup> <u>KGE</u> <u>TGEAGERGLK</u> <u>GHR</u> <u>G</u> <sup>P</sup> <u>FTGLQ</u>                                                                                                                                | 1140 |
| Human  | <u>PTG</u> <u>KQ</u> <u>DRGE</u> <u>AGA</u> <u>Q</u> <sup>P</sup> <u>PM</u> <sup>P</sup> <u>GPS</u> <u>GP</u> <sup>P</sup> <u>PAGARGIQG</u> <u>POG</u> <sup>P</sup> <u>PRGD</u> <sup>P</sup> <u>KGE</u> <u>AGE</u> <sup>P</sup> <u>PERGLK</u> <u>GHR</u> <u>G</u> <sup>P</sup> <u>FTGLQ</u>                                                                                                            |      |
| Bovine | <u>LP</u> <u>GP</u> <sup>P</sup> <u>PP</u> <sup>P</sup> <u>GPSGD</u> <u>QGASGPAGPS</u> <u>GPR</u> <u>GP</u> <sup>P</sup> <u>PP</u> <sup>P</sup> <u>VG</u> <u>PSG</u> <u>KD</u> <sup>P</sup> <u>GANGI</u> <u>PG</u> <sup>P</sup> <u>PIG</u> <sup>P</sup> <u>PP</u> <sup>P</sup> <u>GPR</u> <u>GRS</u> <u>ET</u> <sup>P</sup> <u>GPAG</u>                                                                | 1200 |
| Human  | <u>LP</u> <u>GP</u> <sup>P</sup> <u>PP</u> <sup>P</sup> <u>GPSGD</u> <u>QGASGPAGPS</u> <u>GPR</u> <u>GP</u> <sup>P</sup> <u>PP</u> <sup>P</sup> <u>VG</u> <u>PSG</u> <u>KD</u> <sup>P</sup> <u>GANGI</u> <u>PG</u> <sup>P</sup> <u>PIG</u> <sup>P</sup> <u>PP</u> <sup>P</sup> <u>GPR</u> <u>GRS</u> <u>ET</u> <sup>P</sup> <u>GPAG</u>                                                                |      |
| Bovine | <u>PPGN</u> <u>PG</u> <sup>P</sup> <u>PP</u> <sup>P</sup> <u>GP</u> <u>PG</u> <sup>P</sup> <u>PP</u> <sup>P</sup> <u>GP</u> <u>IDM</u> <u>SAFAG</u> <u>L</u> <sup>P</sup> <u>Q</u> <sup>P</sup> <u>RE</u> <u>KGP</u> <u>D</u> <sup>P</sup> <u>PL</u> <sup>P</sup> <u>Q</u> <sup>P</sup> <u>YMR</u> <u>ADEA</u> <u>A</u> <sup>P</sup> <u>GN</u> <sup>P</sup> <u>L</u> <sup>P</sup> <u>RQ</u> <u>HD</u>  | 1260 |
| Human  | <u>PPGN</u> <u>PG</u> <sup>P</sup> <u>PP</u> <sup>P</sup> <u>GP</u> <u>PG</u> <sup>P</sup> <u>PP</u> <sup>P</sup> <u>GP</u> <u>IDM</u> <u>SAFAG</u> <u>L</u> <sup>P</sup> <u>G</u> <sup>P</sup> <u>PRE</u> <u>KGP</u> <u>D</u> <sup>P</sup> <u>PL</u> <sup>P</sup> <u>Q</u> <sup>P</sup> <u>YMR</u> <u>ADQA</u> <u>A</u> <sup>P</sup> <u>G</u> <sup>P</sup> <u>GL</u> <sup>P</sup> <u>RQ</u> <u>HD</u> |      |

- Identified amino acids are underlined. Hydroxylated proline or lysine residues are bold while unmodified forms are not. If modified and unmodified were detected, additional letters P or K would be added in the upper line of the sequence. Glc-Gal or Gal modified lysines are represented.
- Reference: Van den Steen, P. E.; Proost, P.; Brand, D. D.; Kang, A. H.; Van Damme, J.; Opdenakker, G., Generation of glycosylated remnant epitopes from human collagen type II by gelatinase B. *Biochemistry*. **2004**, 43, (33), 10809-16
